# Supplementary material for: The cyanobacterium Prochlorococcus has divergent light-harvesting antennae and may have evolved in a low-oxygen ocean
Source: PubMed Central journal article supplement — Proc Natl Acad Sci U S A. 2021 Mar 11;118(11):e2025638118. doi: 10.1073/pnas.2025638118 (PMC7980375; doi:10.1073/pnas.2025638118), 2021-03-11
Supplement: pnas.2025638118.sapp.pdf [file pnas.2025638118.sapp.pdf]

# PNAS

[www.pnas.org](http://www.pnas.org)

## **Supplementary Information for:**

**The cyanobacterium *Prochlorococcus* has divergent light-harvesting antennae and may have evolved in a low-oxygen ocean**

Oswaldo Ulloa, Carlos Henríquez-Castillo, Salvador Ramírez-Flandes, Alvaro M. Plominsky, Alejandro A. Murillo, Connor Morgan-Lang, Steven J. Hallam, Ramunas Stepanauskas

### **Corresponding author:**

Oswaldo Ulloa  
Email: [oulloa@udec.cl](mailto:oulloa@udec.cl)

### **This PDF file includes:**

Supplementary Information Text  
SI References  
Figures S1 to S8  
Tables S1 to S5

## Supplementary Information Text

**Metagenomic and metatranscriptomic sequence analysis:** The metagenomic and metatranscriptomic sequence datasets associated with AMZ ecosystems (**Table S5**) were downloaded from the National Center for Biotechnology Information Sequence Read Archive (NCBI SRA) and the European Nucleotide Archive (ENA). For metagenomic recruitment, SAG assemblies (contigs FASTA files) were combined by using “minimus2” (1) to collapse and extend contigs with an overlap of  $\geq 200$  bp at 95% identity. Raw metagenomic sequences (**Table S5**) were quality filtered using Trimmomatic (2) v0.35 with the settings ILLUMINACLIP:adapters/TruSeq3-PE.fa:2:3:10 LEADING:3 TRAILING:3 SLIDINGWINDOW:4:15 MINLEN:36. Illumina paired-end reads were united using FLASH with default settings (3). The metagenomic quality-filtered reads were recruited (**Fig. S7**) using FR-HIT (4) with the following parameters: report recruitments with  $>95\%$  identity to SAG (-c 95), coverage of  $>70\%$  of the read (-m 70), ignore  $<70$  bp reads (-l 70), maximum E-value of  $1E-5$  (-e 0.00001), and reporting only the top 10 hits for each read (-r 10). Considering the comparatively low completeness of the *Prochlorococcus* SAGs, the AMZ I, AMZ II and AMZ III co-assemblies were used as references instead. A python script available on GitHub at [https://github.com/cmorganl/MeatLoaf/blob/master/fr\\_hit\\_filter\\_recruitment\\_summary.py](https://github.com/cmorganl/MeatLoaf/blob/master/fr_hit_filter_recruitment_summary.py) was used to calculate normalized abundance metrics from the FR-HIT outputs, including fragments per million mappable reads per kilobase (FPKM) (**Fig. S7**). As an additional quality control measure, if less than 50% of a genome's

bases recruited reads from a metagenome, the script would set the genome's abundance to zero.

For the metatranscriptomic analysis, the raw paired-end sequences from each dataset were assembled with the VSEARCH software (5) and converted to the FASTA format using stringent quality filter parameters (maxee=0.5). The resulting FASTA files were then aligned with the AMZ SAG contig sequences (> 1000 bp) and the complete genome sequences associated with *Prochlorococcus* and *Synechococcus* in the NCBI Genbank database using NCBI BLAST software (algorithm blastn), with a cutoff nucleotide identity of 95% over a minimum alignment length of 50 nucleotides and a bitscore cutoff of 50. The plot in **Fig. S8** expresses the presence (color) and absence (white) of key transcriptomic sequences related to chlorophyll biosynthesis and photosynthesis in the AMZ-associated metatranscriptomes, grouped by geographic region.

## SI References

1. D. D. Sommer, A. L. Delcher, S. L. Salzberg, M. Pop, Minimus: A fast, lightweight genome assembler. *BMC Bioinformatics* **8**, 64 (2007).
2. A. M. Bolger, M. Lohse, B. Usadel, Trimmomatic: A flexible trimmer for Illumina sequence data. *Bioinformatics* **30**, 2114–2120 (2014).
3. T. Magoč, S. L. Salzberg, FLASH: Fast length adjustment of short reads to improve genome assemblies. *Bioinformatics* **27**, 2957–2963 (2011).
4. B. Niu, Z. Zhu, L. Fu, S. Wu, W. Li, FR-HIT, a very fast program to recruit metagenomic reads to homologous reference genomes. *Bioinformatics* **27**, 1704–1705 (2011).
5. T. Rognes, T. Flouri, B. Nichols, C. Quince, F. Mahé, VSEARCH: a versatile open source tool for metagenomics. *PeerJ* **4**, e2584 (2016).

## Supplementary Figures

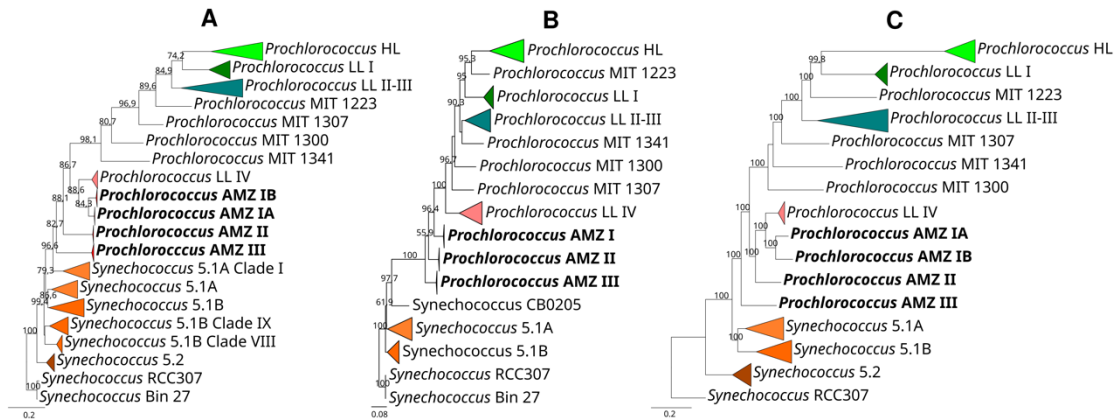

**Fig. S1. Maximum-likelihood phylogenies of *Prochlorococcus* and marine *Synechococcus* based on single marker genes and multiple concatenated marker genes.** ML topology shown with SH-like approximate likelihood ratio support values ( $n=1000$  iterations) given at each node (values  $>50\%$  are shown). Best-fit models were GTR+F+I+G4, SYM+R4, and LG+I+G4, respectively. Each collapsed clade/ecotype is denoted in colored triangles. **(A)** Phylogenetic tree based on the *petB* gene, encoding a component of the cytochrome  $b_6f$  complex; **(B)** Phylogenetic tree based on the *rbcL* gene, encoding the RuBisCO large subunit; **(C)** Phylogenomic tree based on 137 concatenated amino-acid sequences of single-copy genes. Trees were rooted in *Synechococcus* sub-cluster 5.3 representatives.

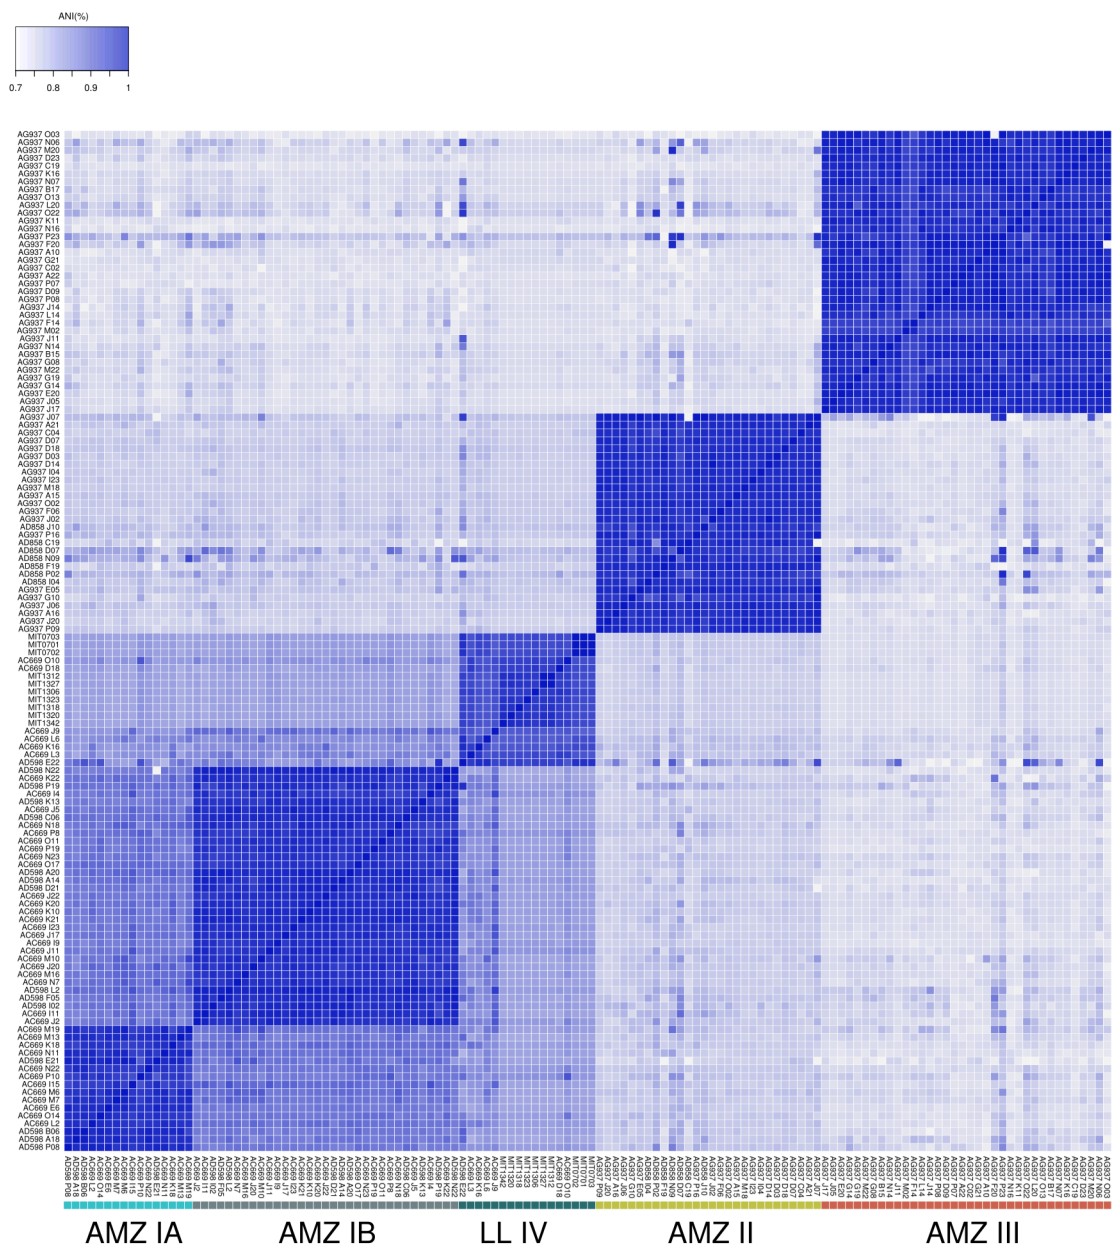

**Fig. S2. Average Nucleotide Identity (ANI) of AMZ SAGs and complete genomes of *Prochlorococcus* LL IV. FastANI values between 0.7 and 1 are shown in the heatmap.**

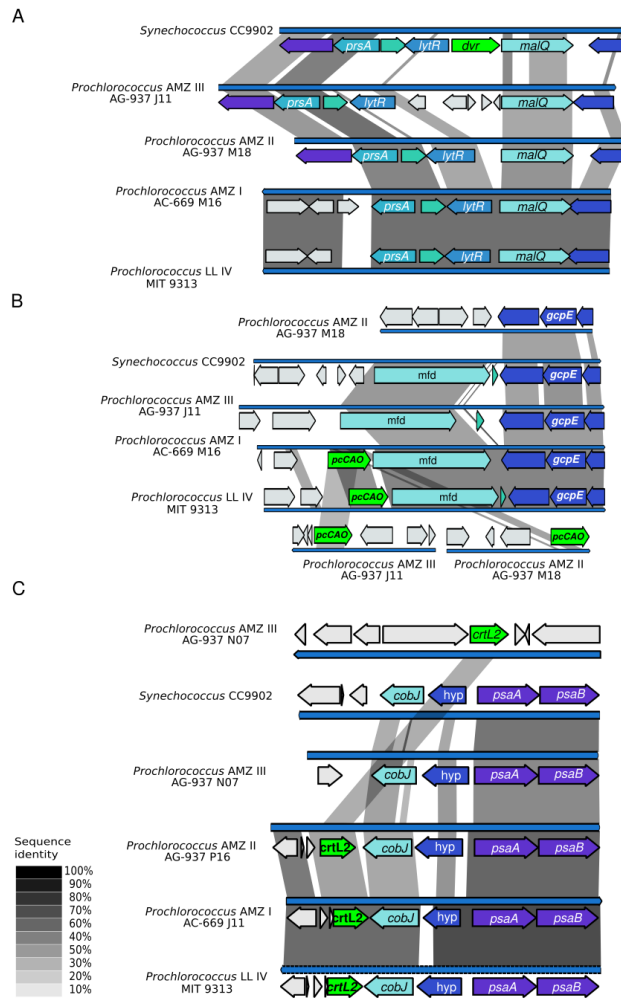

**Fig. S3. Genome synteny between AMZ *Prochlorococcus* lineages and a marine *Synechococcus* reference genome showing the presence–absence of the *dvr*, *pcCAO* and *crtL2* genes.** Grey lines between strains correspond to the sequence identity percentage according to blastn (bitscore >50). Only genes encoding functional proteins are denoted. **(A)** *dvr* gene context: *prsA*: ribose-phosphate pyrophosphokinase. *lytR*: Transcriptional attenuator LytR family; *dvr*: divinylchlorophyllide 8-vinylreductase; *malQ*: 4-alpha-glucanotransferase. **(B)** *pcCAO* gene context: *pcCAO*: *Prochlorococcus* chlorophyllide *a* oxygenase; *mtf*: Transcription repair coupling factor; *gcpE*: 1-hydroxy-2-methyl-2-(E)-butenyl 4-diphosphate synthase. **(C)** *crtL2* gene context: *crtL2*: lycopene epsilon cyclase; *cobJ*: Precorrin-3B C17-methyltransferase; *psaA*: Photosystem I P700 chlorophyll *a* apoprotein A1; *psaB*: Photosystem I P700 chlorophyll *a* apoprotein A2; *hyp*: hypothetical protein.

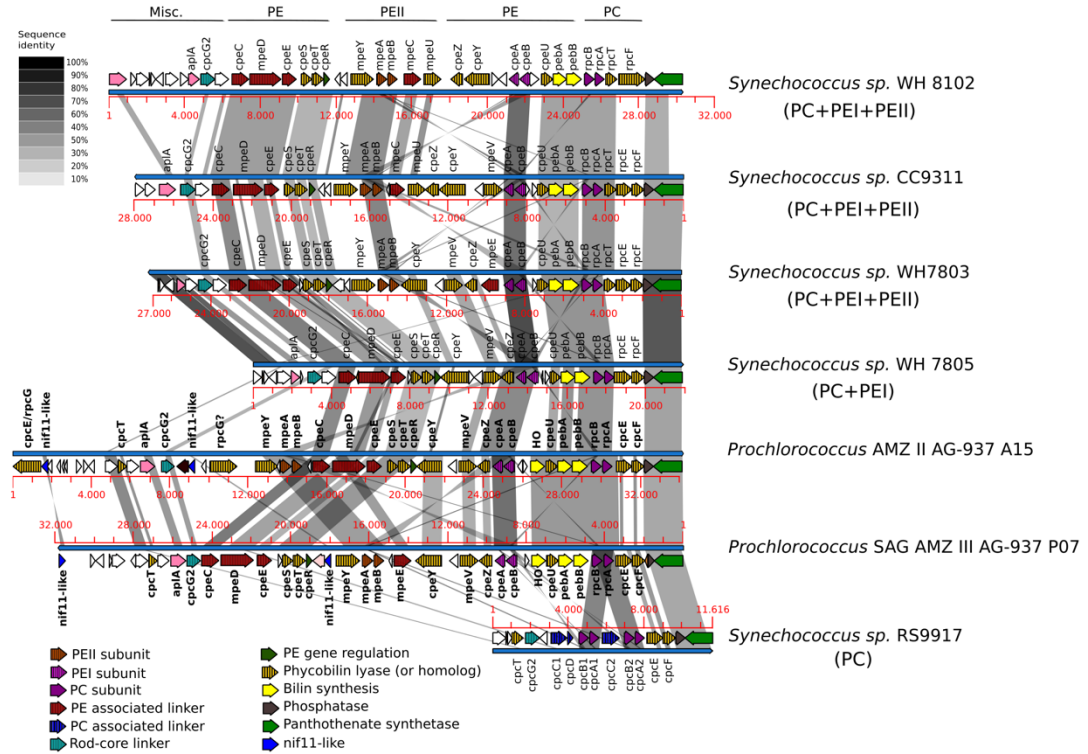

**Fig. S4. Genome synteny of the phycobilisome rod gene region between *Prochlorococcus* AMZ II and AMZ III SAGs and selected marine *Synechococcus* reference genomes.** Genes encoding the different subunits are marked in the upper part of the figure. Misc: Miscellaneous; PE-I: Phycoerythrin I; PE-II: Phycoerythrin II; PC: Phycocyanin.

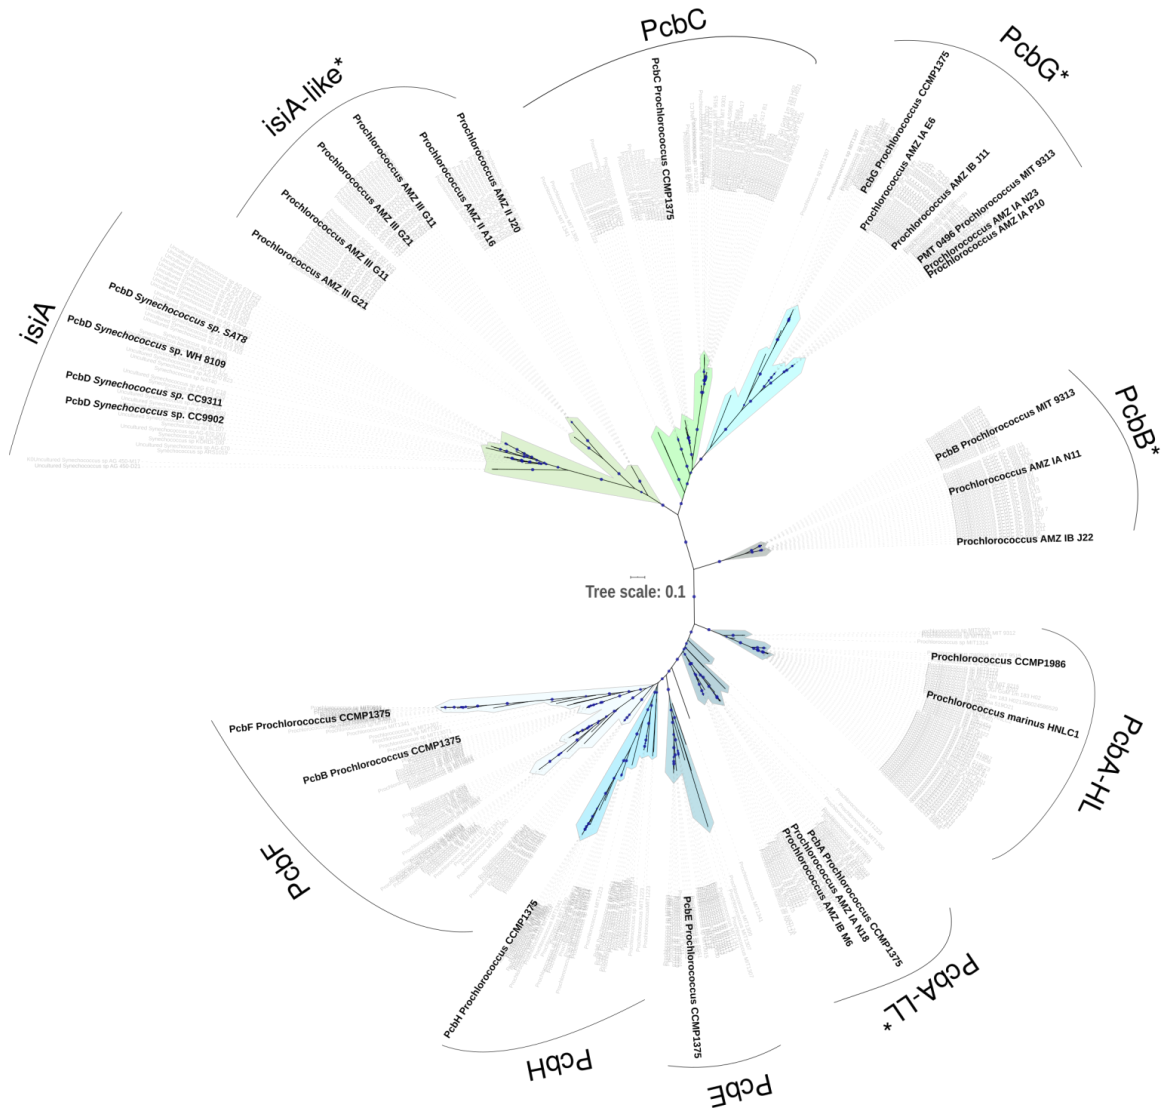

**Fig. S5. Unrooted maximum-likelihood phylogenetic tree of chlorophyll *a/b* binding light-harvesting proteins (Pcbs) in *Prochlorococcus* and marine *Synechococcus*.** Circles show branch support values >50% (n=1000 iterations) at each node. Best-fit model was LG+I+G4. Each *pcb* variant is denoted in colored branches. KEGG orthology for each *pcb* variant of *Prochlorococcus* CCMP1375 and MIT9313 (highlighted in bold) were used for the detection of the variants in all the genomes analyzed. *Prochlorococcus* AMZ SAGs *pcb* variants are marked with asterisks.



# A - AcsF<sub>2</sub>

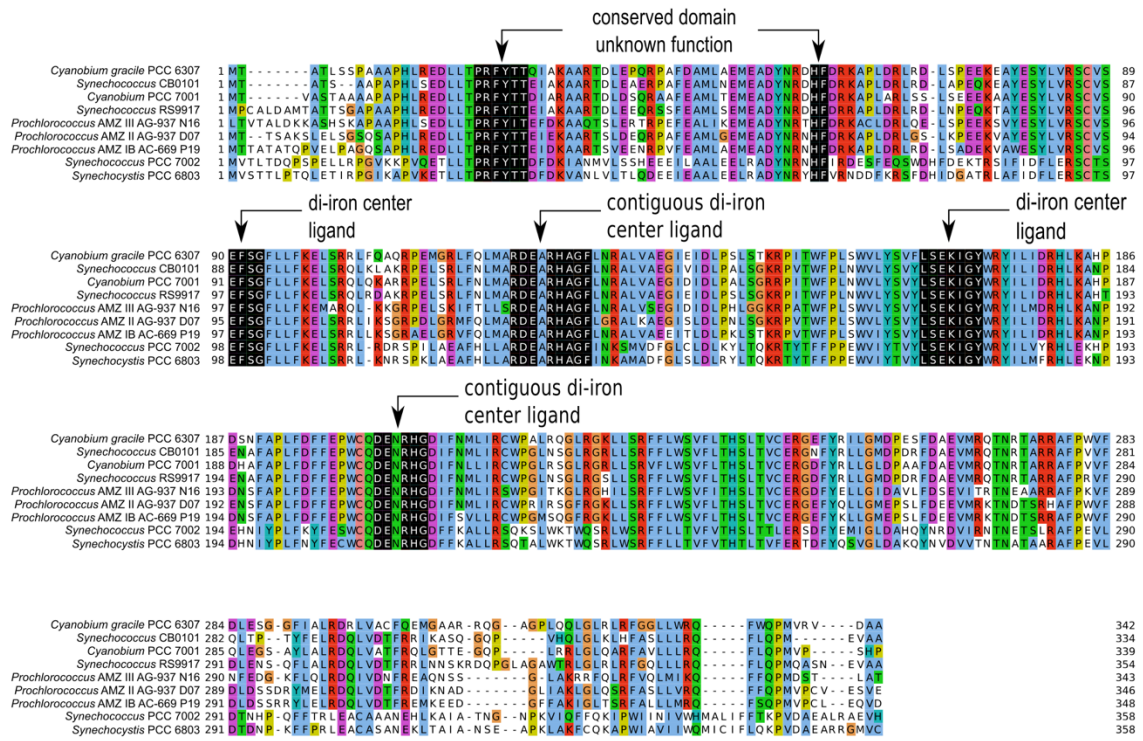



### C - HemN<sub>2</sub>

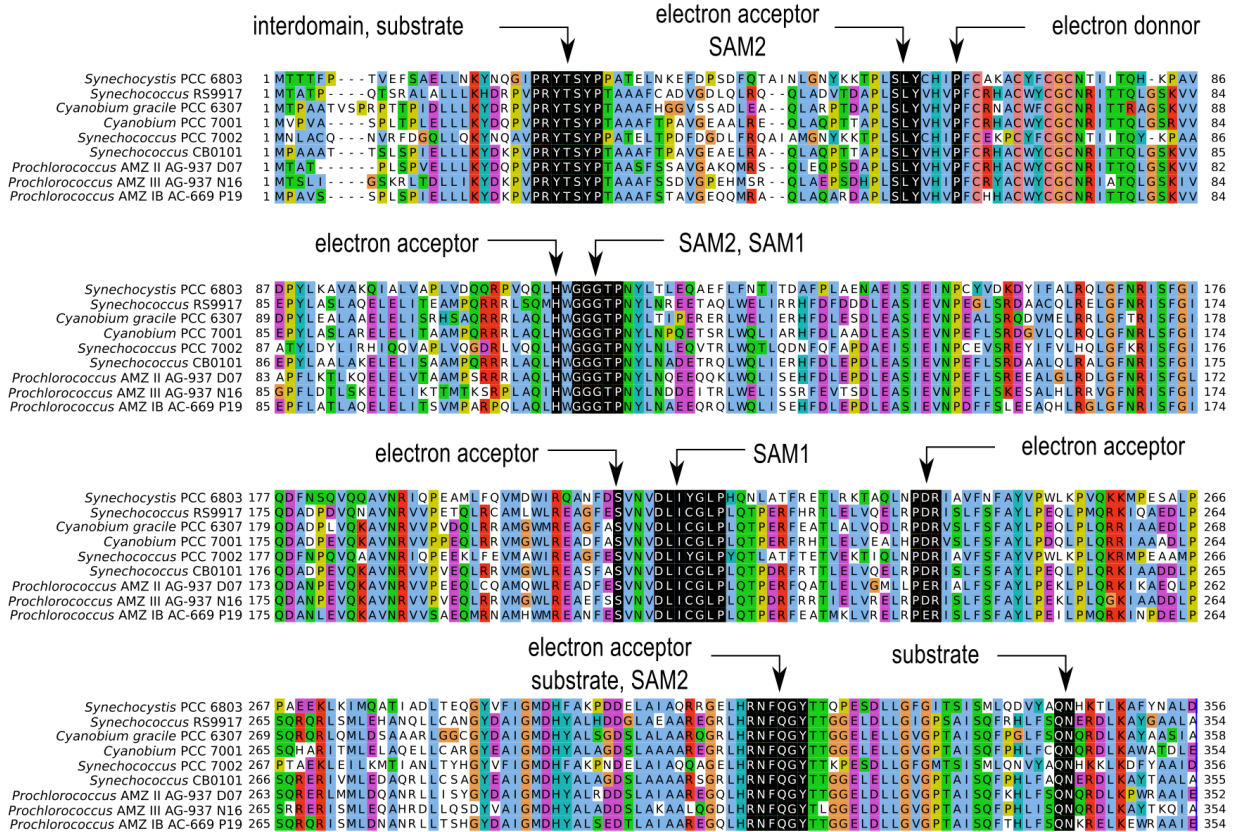

**Fig. S6. Conserved residues in AcsF<sub>2</sub>, HO<sub>2</sub>, and HemN<sub>2</sub>.** Amino acid sequences of (A) AcsF<sub>2</sub>, (B) HO<sub>2</sub>, and (C) HemN<sub>2</sub> in AMZ SAGs and cyanobacteria appearing in Fig. 3.

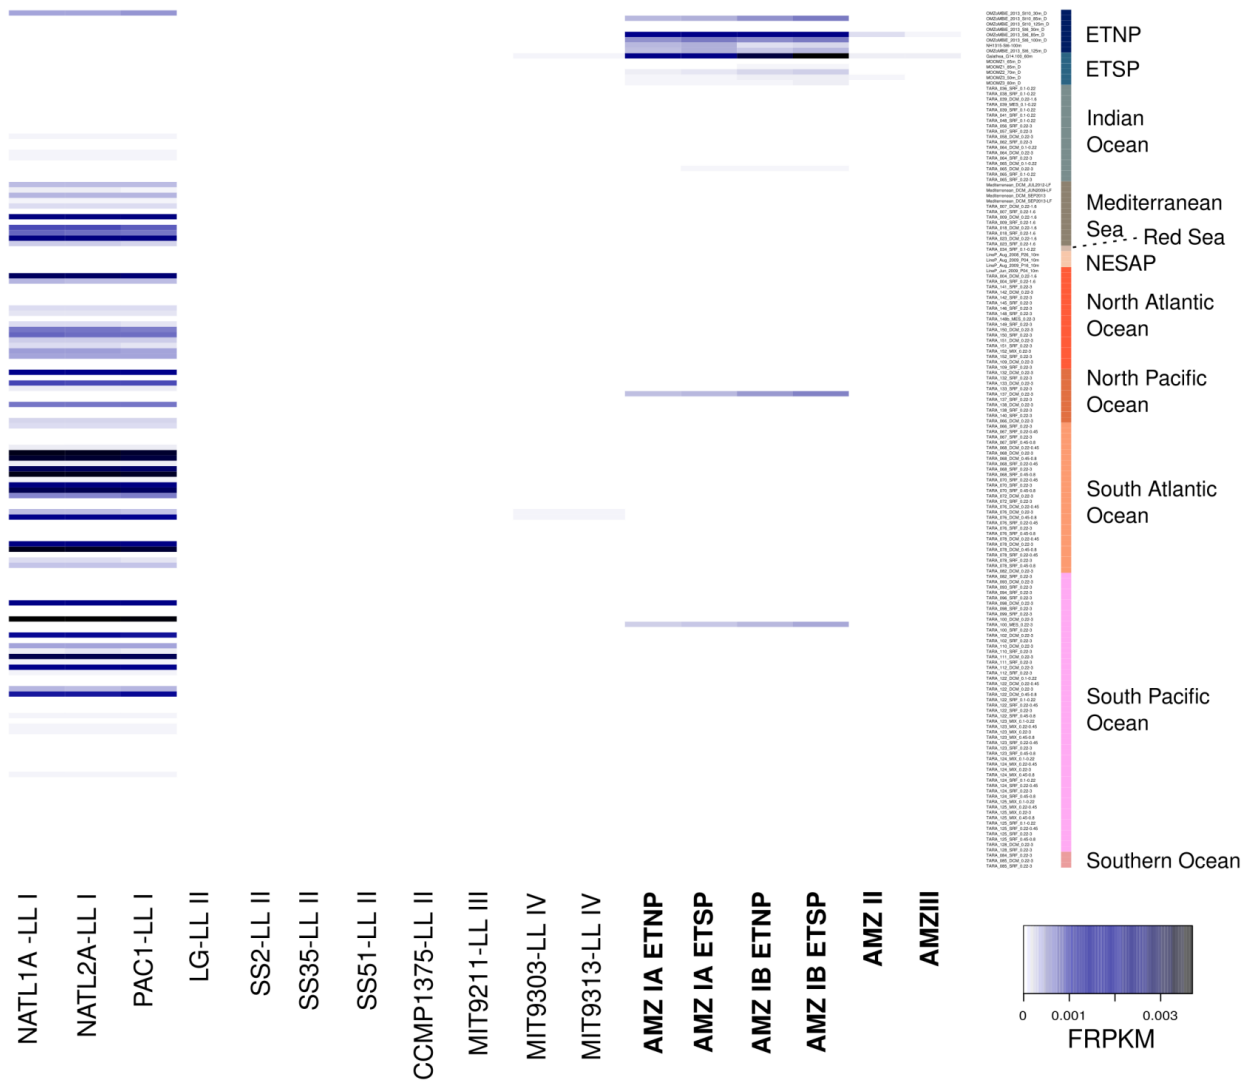

**Fig. S7. Fragment recruitment of publicly available pelagic, upper ocean, microbial metagenomes onto AMZ SAG co-assemblies and *Prochlorococcus* LL genomes.** AMZ *Prochlorococcus* ecotypes were only recruited by metagenomic fragments from oxygen-depleted waters. Co-assemblies of AMZ I SAGs dominated such recruitments. Values correspond to the fragments per kilobase per million (FRPKM) mappable reads. This is similar to reads per kilobase per million (RPKM), but each forward-reverse mate-pair is counted only once.

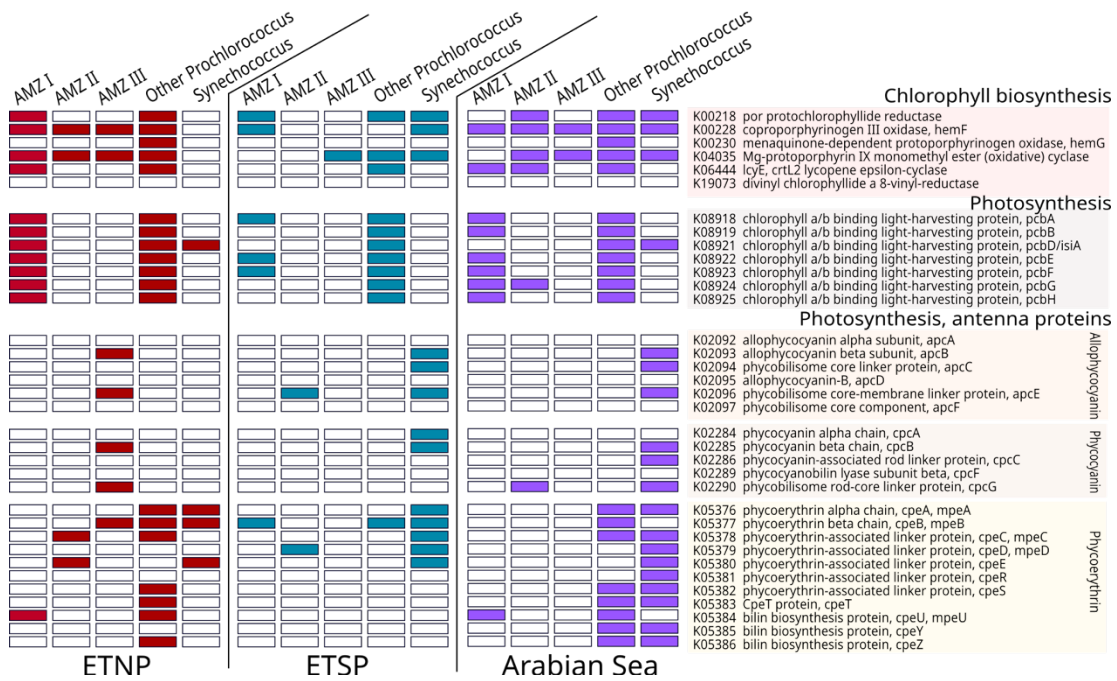

**Fig. S8. Recruitment of transcripts encoding pigment biosynthesis and photosynthetic proteins from AMZ public metatranscriptomes.** The plot shows the presence (color) - absence (white) of transcripts with assigned KEGG orthology related to chlorophyll biosynthesis and photosynthesis, grouped by geographic region (ETNP = eastern tropical North Pacific; ETSP = eastern tropical South Pacific).

## Supplementary Tables

**Table S1.** Statistics and general information for individual AMZ SAGs, combined assemblies, and genomes used in this study.

| <i>Prochlorococcus</i><br>AMZ SAGs        | Clade /<br>Ecotype | Sub-<br>clade* | Accession number / GI | Isolation Site                             | Assembled<br>Sequence Size (bp) | GC<br>Content<br>(%) | Num Genes | Genome<br>Status | NCBI<br>Taxonomy<br>ID | CheckM<br>completeness<br>(%) | CheckM<br>contamination<br>(%) | Included in Co-assembly (name) |
|-------------------------------------------|--------------------|----------------|-----------------------|--------------------------------------------|---------------------------------|----------------------|-----------|------------------|------------------------|-------------------------------|--------------------------------|--------------------------------|
| <i>Prochlorococcus</i><br>SCGC AC-669_E6  | AMZ I              | A              | 2626541501            | Eastern Tropical South<br>Pacific AMZ, 53m | 1317901                         | 48                   | 1709      | SAG              | 159733                 | 39.26                         | 0.00                           |                                |
| <i>Prochlorococcus</i><br>SCGC AC-669_I11 | AMZ I              | B              | 2626541503            | Eastern Tropical South<br>Pacific AMZ, 53m | 919561                          | 48                   | 1261      | SAG              | 159733                 | 18.97                         | 1.72                           |                                |
| <i>Prochlorococcus</i><br>SCGC AC-669_I15 | AMZ I              | A              | 2626541504            | Eastern Tropical South<br>Pacific AMZ, 53m | 1485336                         | 47                   | 1852      | SAG              | 159733                 | 48.07                         | 1.72                           | AMZ I-A-ETSP                   |
| <i>Prochlorococcus</i><br>SCGC AC-669_I23 | AMZ I              | B              | 2626541505            | Eastern Tropical South<br>Pacific AMZ, 53m | 1656299                         | 49                   | 2427      | SAG              | 159733                 | 33.62                         | 3.45                           |                                |
| <i>Prochlorococcus</i><br>SCGC AC-669_I4  | AMZ I              | B              | 2626541506            | Eastern Tropical South<br>Pacific AMZ, 53m | 840753                          | 49                   | 1425      | SAG              | 159733                 | 20.69                         | 1.72                           |                                |
| <i>Prochlorococcus</i><br>SCGC AC-669_I9  | AMZ I              | B              | 2626541507            | Eastern Tropical South<br>Pacific AMZ, 53m | 1964467                         | 49                   | 2686      | SAG              | 159733                 | 57.07                         | 4.60                           |                                |
| <i>Prochlorococcus</i><br>SCGC AC-669_J11 | AMZ I              | B              | 2626541509            | Eastern Tropical South<br>Pacific AMZ, 53m | 1447579                         | 50                   | 2228      | SAG              | 159733                 | 31.84                         | 2.58                           |                                |
| <i>Prochlorococcus</i><br>SCGC AC-669_J17 | AMZ I              | B              | 2626541510            | Eastern Tropical South<br>Pacific AMZ, 53m | 1027724                         | 49                   | 1446      | SAG              | 159733                 | 31.03                         | 1.72                           |                                |
| <i>Prochlorococcus</i><br>SCGC AC-669_J2  | AMZ I              | B              | 2626541513            | Eastern Tropical South<br>Pacific AMZ, 53m | 748417                          | 49                   | 1351      | SAG              | 159733                 | 28.10                         | 1.72                           |                                |
| <i>Prochlorococcus</i><br>SCGC AC-669_J20 | AMZ I              | B              | 2626541511            | Eastern Tropical South<br>Pacific AMZ, 53m | 1233135                         | 49                   | 1985      | SAG              | 159733                 | 32.76                         | 0.00                           |                                |
| <i>Prochlorococcus</i><br>SCGC AC-669_J22 | AMZ I              | B              | 2626541512            | Eastern Tropical South<br>Pacific AMZ, 53m | 1826776                         | 49                   | 2523      | SAG              | 159733                 | 58.79                         | 4.89                           | AMZ I-B-ETSP                   |
| <i>Prochlorococcus</i><br>SCGC AC-669_J5  | AMZ I              | B              | 2626541514            | Eastern Tropical South<br>Pacific AMZ, 53m | 1359317                         | 49                   | 1796      | SAG              | 159733                 | 27.59                         | 5.17                           |                                |
| <i>Prochlorococcus</i><br>SCGC AC-669_K10 | AMZ I              | B              | 2626541515            | Eastern Tropical South<br>Pacific AMZ, 53m | 1175560                         | 48                   | 1723      | SAG              | 159733                 | 39.66                         | 3.45                           |                                |
| <i>Prochlorococcus</i><br>SCGC AC-669_K18 | AMZ I              | A              | 2626541516            | Eastern Tropical South<br>Pacific AMZ, 53m | 1028957                         | 48                   | 1464      | SAG              | 159733                 | 26.18                         | 2.85                           |                                |
| <i>Prochlorococcus</i><br>SCGC AC-669_K20 | AMZ I              | B              | 2626541517            | Eastern Tropical South<br>Pacific AMZ, 53m | 1706781                         | 49                   | 2490      | SAG              | 159733                 | 51.09                         | 2.17                           | AMZ I-B-ETSP                   |
| <i>Prochlorococcus</i><br>SCGC AC-669_K21 | AMZ I              | B              | 2626541518            | Eastern Tropical South<br>Pacific AMZ, 53m | 1597402                         | 48                   | 1953      | SAG              | 159733                 | 44.83                         | 3.45                           |                                |
| <i>Prochlorococcus</i><br>SCGC AC-669_K22 | AMZ I              | B              | 2626541519            | Eastern Tropical South<br>Pacific AMZ, 53m | 560625                          | 48                   | 891       | SAG              | 159733                 | 0.00                          | 0.00                           |                                |
| <i>Prochlorococcus</i><br>SCGC AC-669_L2  | AMZ I              | A              | 2626541520            | Eastern Tropical South<br>Pacific AMZ, 53m | 1111251                         | 49                   | 1669      | SAG              | 159733                 | 33.97                         | 2.17                           |                                |
| <i>Prochlorococcus</i><br>SCGC AC-669_M10 | AMZ I              | B              | 2626541521            | Eastern Tropical South<br>Pacific AMZ, 53m | 677609                          | 47                   | 889       | SAG              | 159733                 | 19.86                         | 0.68                           |                                |
| <i>Prochlorococcus</i><br>SCGC AC-669_M13 | AMZ I              | A              | 2626541522            | Eastern Tropical South<br>Pacific AMZ, 53m | 1019308                         | 48                   | 1382      | SAG              | 159733                 | 37.93                         | 2.59                           |                                |
| <i>Prochlorococcus</i><br>SCGC AC-669_M16 | AMZ I              | B              | 2626541523            | Eastern Tropical South<br>Pacific AMZ, 53m | 1336608                         | 49                   | 2014      | SAG              | 159733                 | 40.28                         | 6.90                           |                                |
| <i>Prochlorococcus</i><br>SCGC AC-669_M19 | AMZ I              | A              | 2626541524            | Eastern Tropical South<br>Pacific AMZ, 53m | 440044                          | 48                   | 744       | SAG              | 159733                 | 13.79                         | 1.72                           |                                |

|                                    |       |   |            |                                             |         |    |      |     |        |       |      |              |
|------------------------------------|-------|---|------------|---------------------------------------------|---------|----|------|-----|--------|-------|------|--------------|
| Prochlorococcus<br>SCGC AC-669_M6  | AMZ I | A | 2626541525 | Eastern Tropical South<br>Pacific AMZ, 53m  | 1179216 | 48 | 1481 | SAG | 159733 | 33.62 | 2.87 |              |
| Prochlorococcus<br>SCGC AC-669_M7  | AMZ I | A | 2626541526 | Eastern Tropical South<br>Pacific AMZ, 53m  | 1512787 | 49 | 2280 | SAG | 159733 | 43.59 | 4.21 | AMZ I-A-ETSP |
| Prochlorococcus<br>SCGC AC-669_N11 | AMZ I | A | 2626541527 | Eastern Tropical South<br>Pacific AMZ, 53m  | 884928  | 49 | 1259 | SAG | 159733 | 32.84 | 2.67 |              |
| Prochlorococcus<br>SCGC AC-669_N18 | AMZ I | B | 2626541528 | Eastern Tropical South<br>Pacific AMZ, 53m  | 1055396 | 48 | 1364 | SAG | 159733 | 34.14 | 1.37 |              |
| Prochlorococcus<br>SCGC AC-669_N22 | AMZ I | A | 2626541529 | Eastern Tropical South<br>Pacific AMZ, 53m  | 1531124 | 49 | 2569 | SAG | 159733 | 29.17 | 4.21 |              |
| Prochlorococcus<br>SCGC AC-669_N23 | AMZ I | B | 2626541530 | Eastern Tropical South<br>Pacific AMZ, 53m  | 1458221 | 49 | 2492 | SAG | 159733 | 36.54 | 4.44 |              |
| Prochlorococcus<br>SCGC AC-669_N7  | AMZ I | B | 2626541531 | Eastern Tropical South<br>Pacific AMZ, 53m  | 1227375 | 49 | 1908 | SAG | 159733 | 35.24 | 4.81 |              |
| Prochlorococcus<br>SCGC AC-669_O11 | AMZ I | B | 2626541532 | Eastern Tropical South<br>Pacific AMZ, 53m  | 1671148 | 49 | 2032 | SAG | 159733 | 65.62 | 2.72 |              |
| Prochlorococcus<br>SCGC AC-669_O14 | AMZ I | A | 2626541533 | Eastern Tropical South<br>Pacific AMZ, 53m  | 1338060 | 49 | 2192 | SAG | 159733 | 36.21 | 1.72 |              |
| Prochlorococcus<br>SCGC AC-669_O17 | AMZ I | B | 2626541534 | Eastern Tropical South<br>Pacific AMZ, 53m  | 1202301 | 49 | 1947 | SAG | 159733 | 25.00 | 0.00 |              |
| Prochlorococcus<br>SCGC AC-669_P10 | AMZ I | A | 2626541535 | Eastern Tropical South<br>Pacific AMZ, 53m  | 875427  | 47 | 1282 | SAG | 159733 | 18.97 | 1.72 |              |
| Prochlorococcus<br>SCGC AC-669_P19 | AMZ I | B | 2626541536 | Eastern Tropical South<br>Pacific AMZ, 53m  | 1352791 | 50 | 2028 | SAG | 159733 | 43.81 | 2.17 | AMZ I-B-ETSP |
| Prochlorococcus<br>SCGC AC-669_P8  | AMZ I | B | 2626541537 | Eastern Tropical South<br>Pacific AMZ, 53m  | 1536824 | 49 | 2773 | SAG | 159733 | 43.25 | 4.57 |              |
| Prochlorococcus<br>SCGC AD-598_A14 | AMZ I | B | 2716884926 | Eastern Tropical North<br>Pacific AMZ, 100m | 839052  | 49 | 942  | SAG | 159733 | 35.34 | 0.00 | AMZ I-ETNP   |
| Prochlorococcus<br>SCGC AD-598_A20 | AMZ I | B | 2716884927 | Eastern Tropical North<br>Pacific AMZ, 100m | 768501  | 49 | 869  | SAG | 159733 | 26.72 | 0.00 |              |
| Prochlorococcus<br>SCGC AD-598_B06 | AMZ I | A | 2718217658 | Eastern Tropical North<br>Pacific AMZ, 100m | 673389  | 49 | 760  | SAG | 159733 | 22.41 | 0.00 | AMZ I-A-ETNP |
| Prochlorococcus<br>SCGC AD-598_C06 | AMZ I | B | 2718217657 | Eastern Tropical North<br>Pacific AMZ, 100m | 859394  | 49 | 976  | SAG | 159733 | 35.19 | 0.00 | AMZ I-ETNP   |
| Prochlorococcus<br>SCGC AD-598_D04 | AMZ I | B | 2724679665 | Eastern Tropical North<br>Pacific AMZ, 100m | 250459  | 47 | 268  | SAG | 159733 | 0.00  | 0.00 |              |
| Prochlorococcus<br>SCGC AD-598_D21 | AMZ I | B | 2724679666 | Eastern Tropical North<br>Pacific AMZ, 100m | 610806  | 49 | 687  | SAG | 159733 | 31.38 | 0.00 |              |
| Prochlorococcus<br>SCGC AD-598_D22 | AMZ I | B | 2724679668 | Eastern Tropical North<br>Pacific AMZ, 100m | 307044  | 39 | 343  | SAG | 159733 | 31.58 |      | AMZ I-B-ETNP |
| Prochlorococcus<br>SCGC AD-598_E21 | AMZ I | A | 2724679669 | Eastern Tropical North<br>Pacific AMZ, 100m | 279858  | 49 | 331  | SAG | 159733 | 13.79 | 0.00 | AMZ I-A-ETNP |
| Prochlorococcus<br>SCGC AD-598_F05 | AMZ I | B | 2724679671 | Eastern Tropical North<br>Pacific AMZ, 100m | 525619  | 48 | 624  | SAG | 159733 | 20.69 | 0.00 |              |
| Prochlorococcus<br>SCGC AD-598_I02 | AMZ I | B | 2724679674 | Eastern Tropical North<br>Pacific AMZ, 100m | 614205  | 50 | 670  | SAG | 159733 | 22.41 | 0.00 |              |
| Prochlorococcus<br>SCGC AD-598_I13 | AMZ I | A | 2724679675 | Eastern Tropical North<br>Pacific AMZ, 100m | 106694  | 49 | 123  | SAG | 159733 | 0.00  | 0.00 |              |
| Prochlorococcus<br>SCGC AD-598_K13 | AMZ I | B | 2724679676 | Eastern Tropical North<br>Pacific AMZ, 100m | 499931  | 47 | 596  | SAG | 159733 | 18.97 | 3.45 |              |
| Prochlorococcus<br>SCGC AD-598_L02 | AMZ I | B | 2724679678 | Eastern Tropical North<br>Pacific AMZ, 100m | 423074  | 48 | 460  | SAG | 159733 | 12.07 | 0.00 |              |
| Prochlorococcus<br>SCGC AD-598_N22 | AMZ I | B | 2724679679 | Eastern Tropical North<br>Pacific AMZ, 100m | 445781  | 48 | 515  | SAG | 159733 | 12.07 | 1.72 |              |

|                                    |         |   |            |                                             |         |    |      |     |        |       |      |              |
|------------------------------------|---------|---|------------|---------------------------------------------|---------|----|------|-----|--------|-------|------|--------------|
| Prochlorococcus<br>SCGC AD-598_P08 | AMZ I   | A | 2724679680 | Eastern Tropical North<br>Pacific AMZ, 100m | 409223  | 48 | 460  | SAG | 159733 | 18.97 | 0.00 | AMZ I-A-ETNP |
| Prochlorococcus<br>SCGC AD-598_P19 | AMZ I   | B | 2724679681 | Eastern Tropical North<br>Pacific AMZ, 100m | 367900  | 48 | 436  | SAG | 159733 | 13.79 | 1.72 |              |
| Prochlorococcus<br>SCGC AG-937_M18 | AMZ II  |   | 2818991511 | Eastern Tropical North<br>Pacific AMZ, 100m | 1670567 | 51 | 1766 | SAG | 159733 | 74.64 | 0.27 | AMZ II       |
| Prochlorococcus<br>SCGC AG-937_P09 | AMZ II  |   | 2818991486 | Eastern Tropical North<br>Pacific AMZ, 100m | 1354439 | 50 | 1450 | SAG | 159733 | 52.99 | 0.68 | AMZ II       |
| Prochlorococcus<br>SCGC AG-937_D07 | AMZ II  |   | 2818991561 | Eastern Tropical North<br>Pacific AMZ, 100m | 1252161 | 51 | 1343 | SAG | 159733 | 52.36 | 0.27 |              |
| Prochlorococcus<br>SCGC AG-937_A15 | AMZ II  |   | 2818991573 | Eastern Tropical North<br>Pacific AMZ, 100m | 1261487 | 51 | 1340 | SAG | 159733 | 50.00 | 0.00 |              |
| Prochlorococcus<br>SCGC AG-937_I23 | AMZ II  |   | 2818991530 | Eastern Tropical North<br>Pacific AMZ, 100m | 1373764 | 51 | 1486 | SAG | 159733 | 49.68 | 0.00 |              |
| Prochlorococcus<br>SCGC AG-937_D14 | AMZ II  |   | 2818991557 | Eastern Tropical North<br>Pacific AMZ, 100m | 1247700 | 50 | 1353 | SAG | 159733 | 49.46 | 0.54 |              |
| Prochlorococcus<br>SCGC AG-937_J17 | AMZ III |   | 2818991522 | Eastern Tropical North<br>Pacific AMZ, 100m | 1622811 | 53 | 1686 | SAG | 159733 | 47.57 | 0.00 |              |
| Prochlorococcus<br>SCGC AG-937_I04 | AMZ II  |   | 2818991533 | Eastern Tropical North<br>Pacific AMZ, 100m | 1100862 | 51 | 1196 | SAG | 159733 | 45.62 | 0.27 |              |
| Prochlorococcus<br>SCGC AG-937_N19 | AMZ III |   | 2818991500 | Eastern Tropical North<br>Pacific AMZ, 100m | 1552091 | 52 | 1524 | SAG | 159733 | 44.14 | 0.00 |              |
| Prochlorococcus<br>SCGC AG-937_J11 | AMZ III |   | 2818991524 | Eastern Tropical North<br>Pacific AMZ, 100m | 1579362 | 53 | 1641 | SAG | 159733 | 43.21 | 0.00 |              |
| Prochlorococcus<br>SCGC AG-937_J20 | AMZ II  |   | 2818991521 | Eastern Tropical North<br>Pacific AMZ, 100m | 1007228 | 49 | 1062 | SAG | 159733 | 35.51 | 0.54 |              |
| Prochlorococcus<br>SCGC AG-937_F06 | AMZ II  |   | 2818991547 | Eastern Tropical North<br>Pacific AMZ, 100m | 911784  | 51 | 1009 | SAG | 159733 | 34.01 | 0.00 |              |
| Prochlorococcus<br>SCGC AG-937_A16 | AMZ II  |   | 2818991572 | Eastern Tropical North<br>Pacific AMZ, 100m | 1080894 | 50 | 1168 | SAG | 159733 | 31.79 | 0.00 |              |
| Prochlorococcus<br>SCGC AG-937_P19 | AMZ III |   | 2818991482 | Eastern Tropical North<br>Pacific AMZ, 100m | 1612441 | 53 | 1716 | SAG | 159733 | 31.03 | 0.00 |              |
| Prochlorococcus<br>SCGC AG-937_J05 | AMZ III |   | 2818991528 | Eastern Tropical North<br>Pacific AMZ, 100m | 1713651 | 52 | 1743 | SAG | 159733 | 30.14 | 0.00 |              |
| Prochlorococcus<br>SCGC AG-937_N07 | AMZ III |   | 2818991506 | Eastern Tropical North<br>Pacific AMZ, 100m | 1382933 | 53 | 1419 | SAG | 159733 | 29.30 | 0.00 |              |
| Prochlorococcus<br>SCGC AG-937_O13 | AMZ III |   | 2818991493 | Eastern Tropical North<br>Pacific AMZ, 100m | 1213875 | 52 | 1285 | SAG | 159733 | 28.45 | 0.00 |              |
| Prochlorococcus<br>SCGC AG-937_O02 | AMZ II  |   | 2818991498 | Eastern Tropical North<br>Pacific AMZ, 100m | 834822  | 50 | 930  | SAG | 159733 | 27.59 | 0.00 |              |
| Prochlorococcus<br>SCGC AG-937_K16 | AMZ III |   | 2818991519 | Eastern Tropical North<br>Pacific AMZ, 100m | 1769820 | 52 | 1811 | SAG | 159733 | 26.72 | 0.00 |              |
| Prochlorococcus<br>SCGC AG-937_A21 | AMZ II  |   | 2818991571 | Eastern Tropical North<br>Pacific AMZ, 100m | 947998  | 50 | 1027 | SAG | 159733 | 24.39 | 0.00 |              |
| Prochlorococcus<br>SCGC AG-937_O08 | AMZ II  |   | 2818991494 | Eastern Tropical North<br>Pacific AMZ, 100m | 619850  | 50 | 680  | SAG | 159733 | 17.24 | 0.00 |              |
| Prochlorococcus<br>SCGC AG-937_C04 | AMZ II  |   | 2818991565 | Eastern Tropical North<br>Pacific AMZ, 100m | 839306  | 50 | 916  | SAG | 159733 | 15.52 | 0.00 |              |
| Prochlorococcus<br>SCGC AG-937_J02 | AMZ II  |   | 2818991529 | Eastern Tropical North<br>Pacific AMZ, 100m | 855174  | 51 | 921  | SAG | 159733 | 5.33  | 0.00 |              |
| Prochlorococcus<br>SCGC AG-937_P08 | AMZ III |   | 2818991487 | Eastern Tropical North<br>Pacific AMZ, 100m | 1234590 | 52 | 1300 | SAG | 159733 | 5.17  | 0.00 |              |
| Prochlorococcus<br>SCGC AG-937_N23 | AMZ II  |   | 2818991499 | Eastern Tropical North<br>Pacific AMZ, 100m | 579707  | 52 | 611  | SAG | 159733 | 5.17  | 0.00 |              |



|                                    |         |            |                                             |         |    |      |     |        |       |      |         |
|------------------------------------|---------|------------|---------------------------------------------|---------|----|------|-----|--------|-------|------|---------|
| Prochlorococcus<br>SCGC AG-937_D18 | AMZ II  | 2818991555 | Eastern Tropical North<br>Pacific AMZ, 100m | 1075781 | 50 | 1105 | SAG | 159733 | 4.17  | 0.00 |         |
| Prochlorococcus<br>SCGC AG-937_M02 | AMZ III | 2818991513 | Eastern Tropical North<br>Pacific AMZ, 100m | 978403  | 51 | 1022 | SAG | 159733 | 4.17  | 0.00 |         |
| Prochlorococcus<br>SCGC AG-937_D23 | AMZ III | 2818991553 | Eastern Tropical North<br>Pacific AMZ, 100m | 926146  | 53 | 944  | SAG | 159733 | 0.00  | 0.00 |         |
| Prochlorococcus<br>SCGC AG-937_D03 | AMZ II  | 2818991563 | Eastern Tropical North<br>Pacific AMZ, 100m | 805161  | 51 | 886  | SAG | 159733 | 0.00  | 0.00 |         |
| Prochlorococcus<br>SCGC AG-937_P16 | AMZ II  | 2818991485 | Eastern Tropical North<br>Pacific AMZ, 100m | 712242  | 51 | 786  | SAG | 159733 | 0.00  | 0.00 |         |
| Prochlorococcus<br>SCGC AG-937_E20 | AMZ III | 2818991549 | Eastern Tropical North<br>Pacific AMZ, 100m | 1102164 | 52 | 1175 | SAG | 159733 | 47.83 | 0.00 | AMZ III |
| Prochlorococcus<br>SCGC AG-937_P07 | AMZ III | 2818991488 | Eastern Tropical North<br>Pacific AMZ, 100m | 935011  | 52 | 996  | SAG | 159733 | 47.01 | 0.54 | AMZ III |
| Prochlorococcus<br>SCGC AG-937_G14 | AMZ III | 2818991539 | Eastern Tropical North<br>Pacific AMZ, 100m | 1093110 | 52 | 1129 | SAG | 159733 | 46.88 | 0.00 | AMZ III |
| Prochlorococcus<br>SCGC AG-937_G21 | AMZ III | 2818991535 | Eastern Tropical North<br>Pacific AMZ, 100m | 852506  | 53 | 846  | SAG | 159733 | 41.21 | 0.27 |         |
| Prochlorococcus<br>SCGC AG-937_E05 | AMZ II  | 2818991551 | Eastern Tropical North<br>Pacific AMZ, 100m | 578566  | 51 | 612  | SAG | 159733 | 37.93 | 1.72 |         |
| Prochlorococcus<br>SCGC AG-937_M20 | AMZ III | 2818991510 | Eastern Tropical North<br>Pacific AMZ, 100m | 989117  | 52 | 1089 | SAG | 159733 | 36.90 | 0.00 |         |
| Prochlorococcus<br>SCGC AG-937_L14 | AMZ III | 2818991515 | Eastern Tropical North<br>Pacific AMZ, 100m | 1156407 | 51 | 1174 | SAG | 159733 | 35.52 | 0.00 |         |
| Prochlorococcus<br>SCGC AG-937_B17 | AMZ III | 2818991567 | Eastern Tropical North<br>Pacific AMZ, 100m | 1102965 | 51 | 1165 | SAG | 159733 | 34.48 | 0.00 |         |
| Prochlorococcus<br>SCGC AG-937_C02 | AMZ III | 2818991566 | Eastern Tropical North<br>Pacific AMZ, 100m | 773291  | 53 | 813  | SAG | 159733 | 29.35 | 0.27 |         |
| Prochlorococcus<br>SCGC AG-937_C19 | AMZ III | 2818991564 | Eastern Tropical North<br>Pacific AMZ, 100m | 919758  | 52 | 947  | SAG | 159733 | 28.44 | 0.00 |         |
| Prochlorococcus<br>SCGC AG-937_D09 | AMZ III | 2818991559 | Eastern Tropical North<br>Pacific AMZ, 100m | 617600  | 54 | 646  | SAG | 159733 | 27.93 | 0.00 |         |
| Prochlorococcus<br>SCGC AG-937_K23 | AMZ III | 2818991516 | Eastern Tropical North<br>Pacific AMZ, 100m | 1247789 | 53 | 1250 | SAG | 159733 | 25.86 | 0.00 |         |
| Prochlorococcus<br>SCGC AG-937_N14 | AMZ III | 2818991503 | Eastern Tropical North<br>Pacific AMZ, 100m | 630178  | 53 | 597  | SAG | 159733 | 25.05 | 0.00 |         |
| Prochlorococcus<br>SCGC AG-937_N16 | AMZ III | 2818991501 | Eastern Tropical North<br>Pacific AMZ, 100m | 906323  | 52 | 960  | SAG | 159733 | 24.73 | 0.00 |         |
| Prochlorococcus<br>SCGC AG-937_K11 | AMZ III | 2818991520 | Eastern Tropical North<br>Pacific AMZ, 100m | 1087940 | 52 | 1100 | SAG | 159733 | 24.41 | 0.00 |         |
| Prochlorococcus<br>SCGC AG-937_D11 | AMZ III | 2818991558 | Eastern Tropical North<br>Pacific AMZ, 100m | 858034  | 50 | 861  | SAG | 159733 | 24.14 | 0.00 |         |
| Prochlorococcus<br>SCGC AG-937_F14 | AMZ III | 2818991546 | Eastern Tropical North<br>Pacific AMZ, 100m | 722449  | 52 | 775  | SAG | 159733 | 23.31 | 0.00 |         |
| Prochlorococcus<br>SCGC AG-937_F20 | AMZ III | 2818991545 | Eastern Tropical North<br>Pacific AMZ, 100m | 509342  | 54 | 558  | SAG | 159733 | 22.41 | 0.00 |         |
| Prochlorococcus<br>SCGC AG-937_F21 | AMZ III | 2818991544 | Eastern Tropical North<br>Pacific AMZ, 100m | 1442092 | 52 | 1453 | SAG | 159733 | 20.69 | 0.00 |         |
| Prochlorococcus<br>SCGC AG-937_J06 | AMZ II  | 2818991527 | Eastern Tropical North<br>Pacific AMZ, 100m | 621910  | 50 | 662  | SAG | 159733 | 20.69 | 0.00 |         |
| Prochlorococcus<br>SCGC AG-937_A04 | AMZ III | 2818991575 | Eastern Tropical North<br>Pacific AMZ, 100m | 1306984 | 51 | 1420 | SAG | 159733 | 20.69 | 0.00 |         |
| Prochlorococcus<br>SCGC AG-937_G19 | AMZ III | 2818991536 | Eastern Tropical North<br>Pacific AMZ, 100m | 653852  | 54 | 632  | SAG | 159733 | 20.69 | 0.00 |         |

|                                    |         |            |                                             |         |    |      |     |        |       |      |
|------------------------------------|---------|------------|---------------------------------------------|---------|----|------|-----|--------|-------|------|
| Prochlorococcus<br>SCGC AG-937_N15 | AMZ III | 2818991502 | Eastern Tropical North<br>Pacific AMZ, 100m | 863565  | 53 | 920  | SAG | 159733 | 20.69 | 0.00 |
| Prochlorococcus<br>SCGC AG-937_P18 | AMZ III | 2818991483 | Eastern Tropical North<br>Pacific AMZ, 100m | 909842  | 52 | 925  | SAG | 159733 | 19.43 | 0.00 |
| Prochlorococcus<br>SCGC AD-858-I04 | AMZ II  | 2724679758 | Eastern Tropical North<br>Pacific AMZ, 100m | 487413  | 49 | 514  | SAG | 159733 | 18.97 | 0.00 |
| Prochlorococcus<br>SCGC AG-937_M22 | AMZ III | 2818991509 | Eastern Tropical North<br>Pacific AMZ, 100m | 939699  | 52 | 1020 | SAG | 159733 | 18.97 | 0.00 |
| Prochlorococcus<br>SCGC AG-937_J08 | AMZ III | 2818991525 | Eastern Tropical North<br>Pacific AMZ, 100m | 461235  | 52 | 477  | SAG | 159733 | 18.97 | 0.00 |
| Prochlorococcus<br>SCGC AG-937_J14 | AMZ III | 2818991523 | Eastern Tropical North<br>Pacific AMZ, 100m | 450359  | 53 | 506  | SAG | 159733 | 18.97 | 0.00 |
| Prochlorococcus<br>SCGC AG-937_G08 | AMZ III | 2818991542 | Eastern Tropical North<br>Pacific AMZ, 100m | 803526  | 53 | 816  | SAG | 159733 | 18.97 | 0.00 |
| Prochlorococcus<br>SCGC AG-937_A22 | AMZ III | 2818991570 | Eastern Tropical North<br>Pacific AMZ, 100m | 1052010 | 51 | 1133 | SAG | 159733 | 17.24 | 0.00 |
| Prochlorococcus<br>SCGC AG-937_B15 | AMZ III | 2818991568 | Eastern Tropical North<br>Pacific AMZ, 100m | 897180  | 51 | 935  | SAG | 159733 | 17.24 | 0.00 |
| Prochlorococcus<br>SCGC AG-937_G11 | AMZ III | 2818991540 | Eastern Tropical North<br>Pacific AMZ, 100m | 470938  | 51 | 432  | SAG | 159733 | 17.24 | 0.00 |
| Prochlorococcus<br>SCGC AD-858-N09 | AMZ II  | 2724679773 | Eastern Tropical North<br>Pacific AMZ, 100m | 197705  | 46 | 191  | SAG | 159733 | 17.24 | 0.00 |
| Prochlorococcus<br>SCGC AD-858-F19 | AMZ II  | 2724679753 | Eastern Tropical North<br>Pacific AMZ, 100m | 203942  | 48 | 222  | SAG | 159733 | 13.79 | 0.00 |
| Prochlorococcus<br>SCGC AG-937_G10 | AMZ II  | 2818991541 | Eastern Tropical North<br>Pacific AMZ, 100m | 251199  | 50 | 301  | SAG | 159733 | 13.36 | 0.00 |
| Prochlorococcus<br>SCGC AG-937_N06 | AMZ III | 2818991507 | Eastern Tropical North<br>Pacific AMZ, 100m | 430794  | 51 | 496  | SAG | 159733 | 13.32 | 0.00 |
| Prochlorococcus<br>SCGC AG-937_O22 | AMZ III | 2818991490 | Eastern Tropical North<br>Pacific AMZ, 100m | 221325  | 53 | 223  | SAG | 159733 | 12.07 | 0.00 |
| Prochlorococcus<br>SCGC AG-937_P23 | AMZ III | 2818991481 | Eastern Tropical North<br>Pacific AMZ, 100m | 172363  | 53 | 207  | SAG | 159733 | 10.34 | 0.00 |
| Prochlorococcus<br>SCGC AD-858-D07 | AMZ II  | 2724679692 | Eastern Tropical North<br>Pacific AMZ, 100m | 240816  | 48 | 263  | SAG | 159733 | 10.34 | 0.00 |
| Prochlorococcus<br>SCGC AD-858-J10 | AMZ II  | 2724679760 | Eastern Tropical North<br>Pacific AMZ, 100m | 486624  | 47 | 519  | SAG | 159733 | 8.33  | 0.00 |
| Prochlorococcus<br>SCGC AG-937_P17 | AMZ III | 2818991484 | Eastern Tropical North<br>Pacific AMZ, 100m | 823764  | 51 | 825  | SAG | 159733 | 5.17  | 0.00 |
| Prochlorococcus<br>SCGC AD-858-C19 | AMZ II  | 2724679684 | Eastern Tropical North<br>Pacific AMZ, 100m | 267436  | 44 | 299  | SAG | 159733 | 5.17  | 1.72 |
| Prochlorococcus<br>SCGC AD-858-P02 | AMZ II  | 2724679775 | Eastern Tropical North<br>Pacific AMZ, 100m | 338758  | 51 | 369  | SAG | 159733 | 4.48  | 0.00 |
| Prochlorococcus<br>SCGC AG-937_J07 | AMZ II  | 2818991526 | Eastern Tropical North<br>Pacific AMZ, 100m | 121156  | 51 | 140  | SAG | 159733 | 4.17  | 0.00 |
| Prochlorococcus<br>SCGC AG-937_L20 | AMZ III | 2818991514 | Eastern Tropical North<br>Pacific AMZ, 100m | 426395  | 51 | 482  | SAG | 159733 | 0.00  | 0.00 |
| Prochlorococcus<br>SCGC AG-937_N04 | AMZ III | 2818991508 | Eastern Tropical North<br>Pacific AMZ, 100m | 490658  | 53 | 536  | SAG | 159733 | 0.00  | 0.00 |
| Prochlorococcus<br>SCGC AG-937_O03 | AMZ III | 2818991497 | Eastern Tropical North<br>Pacific AMZ, 100m | 171319  | 50 | 214  | SAG | 159733 | 0.00  | 0.00 |

| <i>Prochlorococcus</i> AMZ SAG combined assemblies | Clade / Ecotype | Sub-clade* | Accession number / GI | Isolation Site                           | Assembled Sequence Size (bp) | GC Content (%) | Num Genes | Genome Status             | NCBI Taxonomy ID | CheckM completeness (%) | CheckM contamination (%) | Comments                                                                                                                                                                   |
|----------------------------------------------------|-----------------|------------|-----------------------|------------------------------------------|------------------------------|----------------|-----------|---------------------------|------------------|-------------------------|--------------------------|----------------------------------------------------------------------------------------------------------------------------------------------------------------------------|
| <i>Prochlorococcus</i> co-assembly_AMZ I-A-ETNP    | AMZ I           | A          |                       | Eastern Tropical North Pacific AMZ, 100m | 1272309                      |                |           | Combined Assembly of SAGs | 159733           | 36.21                   |                          | Combined assembly of <i>Prochlorococcus</i> SAGs SCGC AD-598_B06, SCGC AD-598_P08, SCGC AD-598_E21                                                                         |
| <i>Prochlorococcus</i> co-assembly_AMZ I-A-ETSP    | AMZ I           | A          |                       | Eastern Tropical South Pacific AMZ, 53m  | 3778549                      |                |           | Combined Assembly of SAGs | 159733           | 90.72                   |                          | Combined assembly of <i>Prochlorococcus</i> SAGs SCGC AC-669_E6, SCGC AC-669_L2, SCGC AC-669_M7, and SCGC AC-669_N22                                                       |
| <i>Prochlorococcus</i> co-assembly_AMZ I-B-ETNP    | AMZ I           | B          |                       | Eastern Tropical North Pacific AMZ, 100m | 3683744                      |                |           | Combined Assembly of SAGs | 159733           | 81.9                    |                          | Combined assembly of <i>Prochlorococcus</i> SAGs SCGC AD-598_D22, SCGC AD-598_A14, SCGC AD-598_N22, SCGC AD-598_C06, SCGC AD-598_D21, SCGC AD-598_A20, and SCGC AD-598_I02 |
| <i>Prochlorococcus</i> co-assembly_AMZ I-B-ETSP    | AMZ I           | B          |                       | Eastern Tropical South Pacific AMZ, 53m  | 5060980                      |                |           | Combined Assembly of SAGs | 159733           | 98.28                   |                          | Combined assembly of <i>Prochlorococcus</i> SAGs SCGC AC-669_I9, SCGC AC-669_P19, SCGC AC-669_J22, and SCGC AC-669_K20                                                     |
| <i>Prochlorococcus</i> co-assembly_AMZ II          | AMZ II          |            |                       | Eastern Tropical North Pacific AMZ, 100m | 4333338                      |                |           | Combined Assembly of SAGs | 159733           | 100                     |                          | Combined assembly of <i>Prochlorococcus</i> SAGs SCGC AG937_M18, SCGC AG937_P09, SCGC AG937_D14, and SCGC AG937_C04                                                        |
| <i>Prochlorococcus</i> co-assembly_AMZ III         | AMZ III         |            |                       | Eastern Tropical North Pacific AMZ, 100m | 6365660                      |                |           | Combined Assembly of SAGs | 159733           | 96.55                   |                          | Combined assembly of <i>Prochlorococcus</i> SAGs SCGC AG937_J11, SCGC AG937_J05, SCGC AG937_N07, SCGC AG937_K16, and SCGC AG937_G21                                        |

| Other <i>Prochlorococcus</i>                      | Clade / Ecotype | Sub-clade | Accession number / GI                          | Isolation Site                                      | Assembled Sequence Size (bp) | GC Content (%) | Num Genes | Genome Status | NCBI Taxonomy ID | CheckM completeness (%) | CheckM contamination (%) | Comments |
|---------------------------------------------------|-----------------|-----------|------------------------------------------------|-----------------------------------------------------|------------------------------|----------------|-----------|---------------|------------------|-------------------------|--------------------------|----------|
| <i>Prochlorococcus</i> bacterium JGI 01_M5        |                 |           | 2724679602 / (Biosample Acc. No.) SAMN07626394 | North Pacific Subtropical Gyre, Station ALOHA, 25m  | 504819                       | 32             | 614       | WGS           | 2035230          |                         |                          |          |
| <i>Prochlorococcus</i> bacterium JGI 01_N12       |                 |           | 2747842495 / (Biosample Acc. No.) SAMN07626393 | North Pacific Subtropical Gyre, Station ALOHA, 25m  | 431211                       | 32             | 517       | WGS           | 2035231          |                         |                          |          |
| <i>Prochlorococcus</i> bacterium JGI 02_M7        |                 |           | 2739367794                                     | North Pacific Subtropical Gyre, Station ALOHA, 125m | 754061                       | 32             | 896       | WGS           | 1218             |                         |                          |          |
| <i>Prochlorococcus</i> bacterium JGI 02_N20       |                 |           | 2724679624                                     | North Pacific Subtropical Gyre, Station ALOHA, 125m | 753236                       | 50             | 789       | WGS           | 1218             |                         |                          |          |
| <i>Prochlorococcus</i> marinus JGI GoM_1m_183_B01 |                 |           | (Biosample Acc. No.) SAMN02787045              | Gulf of Mexico 1m                                   | 397407                       | 31.12          | 525       | SAG           |                  |                         |                          |          |
| <i>Prochlorococcus</i> marinus JGI GoM_1m_183_H02 |                 |           | (Biosample Acc. No.) SAMN02787031              | Gulf of Mexico 1m                                   | 1131810                      | 31.42          | 1337      | SAG           |                  |                         |                          |          |
| <i>Prochlorococcus</i> marinus JGI GoM_1m_183_H07 |                 |           | (Biosample Acc. No.) SAMN02787032              | Gulf of Mexico 1m                                   | 523192                       | 31.8           | 646       | SAG           |                  |                         |                          |          |
| <i>Prochlorococcus</i> SCGC AAA795-F05            |                 |           | (Biosample Acc. No.) SAMEA3368573              | Red Sea, Saudi Arabia                               | 1418370                      | 31.4           | 1564      | SAG           | 1945637          |                         |                          |          |
| <i>Prochlorococcus</i> SCGC AAA795-I06            |                 |           | (Biosample Acc. No.) SAMEA3368574              | Red Sea, Saudi Arabia                               | 1388770                      | 31.1           | 1525      | SAG           | 1219             |                         |                          |          |
| <i>Prochlorococcus</i> SCGC AAA795-I15            |                 |           | (Biosample Acc. No.) SAMEA3368575              | Red Sea, Saudi Arabia                               | 1282940                      | 31.3           | 1393      | SAG           | 1219             |                         |                          |          |
| <i>Prochlorococcus</i> SCGC AAA795-J16            |                 |           | (Biosample Acc. No.) SAMEA3368576              | Red Sea, Saudi Arabia                               | 1463720                      | 31             | 1625      | SAG           | 1219             |                         |                          |          |
| <i>Prochlorococcus</i> SCGC AAA795-M23            |                 |           | (Biosample Acc. No.) SAMEA3368577              | Red Sea, Saudi Arabia                               | 1443990                      | 31.2           | 1626      | SAG           | 1219             |                         |                          |          |
| <i>Prochlorococcus</i> sp. AS9601                 | HL II           |           | CP000551 / 123197646                           | Arabian Sea, 50m                                    | 1669886                      | 31.32          | 1988      | complete      | 146891           |                         |                          |          |
| <i>Prochlorococcus</i> sp. EQPAC1                 | HL I            |           | JNAG00000000 / 691664703                       | Equatorial Pacific, 30m                             | 1654739                      | 30.8           | 1954      | complete      | 190047           |                         |                          |          |

|                                         |             |                                          |                                                    |         |      |      |          |         |
|-----------------------------------------|-------------|------------------------------------------|----------------------------------------------------|---------|------|------|----------|---------|
| Prochlorococcus sp. GP2                 | HL II       | NZ_JNAH00000000 / 695327059              | Western Pacific, 150m                              | 1624310 | 31.2 | 1863 | complete | 59925   |
| Prochlorococcus sp. HNLC1               | HL III / IV | NZ_GL947594; NZ_ADHP01000000 / 482790805 | Pacific and Indian Oceans                          | 1569623 | -    | 1867 | complete | 1041938 |
| Prochlorococcus sp. HNLC2               | HL III / IV | NZ_GL947595; NZ_ADHP01000000 / 482790806 | Pacific and Indian Oceans                          | 1484494 | -    | 1737 | complete | 1041939 |
| Prochlorococcus sp. HOT_208_60          | HL II       | (Biosample Acc. No.) SAMN06290256        | North Pacific Subtropical Gyre, Station ALOHA, 60m | 886656  | 31.2 | 1162 | SAG      | 1219    |
| Prochlorococcus sp. HOT208_60m_805A16   | HL II       | (Biosample Acc. No.) SAMN06345441        | North Pacific Subtropical Gyre, Station ALOHA, 60m | 999350  | 31.2 | 1121 | SAG      | 1219    |
| Prochlorococcus sp. HOT208_60m_808A10   | HL II       | (Biosample Acc. No.) SAMN06345443        | North Pacific Subtropical Gyre, Station ALOHA, 60m | 1164130 | 31.2 |      | SAG      | 1219    |
| Prochlorococcus sp. HOT208_60m_808G21   | HL II       | (Biosample Acc. No.) SAMN06345444        | North Pacific Subtropical Gyre, Station ALOHA, 60m | 1270810 | 31.4 | 1382 | SAG      | 1219    |
| Prochlorococcus sp. HOT208_60m_808M21   | HL II       | (Biosample Acc. No.) SAMN06345445        | North Pacific Subtropical Gyre, Station ALOHA, 60m | 1489920 | 31.2 | 1658 | SAG      | 1219    |
| Prochlorococcus sp. HOT208_60m_810B23   | HL II       | (Biosample Acc. No.) SAMN06345446        | North Pacific Subtropical Gyre, Station ALOHA, 60m | 1577010 | 31.1 | 1743 | SAG      | 1219    |
| Prochlorococcus sp. HOT208_60m_810P02   | HL II       | (Biosample Acc. No.) SAMN06345447        | North Pacific Subtropical Gyre, Station ALOHA, 60m | 1290000 | 31.3 | 1429 | SAG      | 1219    |
| Prochlorococcus sp. HOT208_60m_813B04   | HL II       | (Biosample Acc. No.) SAMN06345448        | North Pacific Subtropical Gyre, Station ALOHA, 60m | 1210360 | 31.3 | 1309 | SAG      | 1219    |
| Prochlorococcus sp. HOT208_60m_813E23   | HL II       | (Biosample Acc. No.) SAMN06345449        | North Pacific Subtropical Gyre, Station ALOHA, 60m | 525465  | 31.5 | 571  | SAG      | 1219    |
| Prochlorococcus sp. HOT208_60m_813G15   | HL II       | (Biosample Acc. No.) SAMN06345450        | North Pacific Subtropical Gyre, Station ALOHA, 60m | 1405140 | 31.2 | 1556 | SAG      | 1219    |
| Prochlorococcus sp. HOT208_60m_813I02   | HL II       | (Biosample Acc. No.) SAMN06345451        | North Pacific Subtropical Gyre, Station ALOHA, 60m | 1498340 | 31.4 | 1634 | SAG      | 1219    |
| Prochlorococcus sp. HOT208_60m_813L03   | HL II       | (Biosample Acc. No.) SAMN06345452        | North Pacific Subtropical Gyre, Station ALOHA, 60m | 1180540 | 31.3 | 1314 | SAG      | 1219    |
| Prochlorococcus sp. HOT208_60m_813O04   | HL II       | (Biosample Acc. No.) SAMN06345453        | North Pacific Subtropical Gyre, Station ALOHA, 60m | 1147140 | 31.3 | 0    | SAG      | 1219    |
| Prochlorococcus sp. HOT208_60m_813O14   | HL II       | (Biosample Acc. No.) SAMN06345454        | North Pacific Subtropical Gyre, Station ALOHA, 60m | 1353740 | 31.3 | 1509 | SAG      | 1219    |
| Prochlorococcus sp. HOT212_60m_823D04   | HL II       | (Biosample Acc. No.) SAMN06345455        | North Pacific Subtropical Gyre, Station ALOHA, 60m | 390622  | 31.3 | 0    | SAG      | 1219    |
| Prochlorococcus sp. HOT212_60m_824C06   | HL II       | (Biosample Acc. No.) SAMN06345456        | North Pacific Subtropical Gyre, Station ALOHA, 60m | 1021540 | 31.2 | 1145 | SAG      | 1219    |
| Prochlorococcus sp. HOT212_60m_824E10   | HL II       | (Biosample Acc. No.) SAMN06345457        | North Pacific Subtropical Gyre, Station ALOHA, 60m | 1173340 | 31.3 | 1311 | SAG      | 1219    |
| Prochlorococcus sp. HOT212_60m_824O11   | HL II       | (Biosample Acc. No.) SAMN06345458        | North Pacific Subtropical Gyre, Station ALOHA, 60m | 999839  | 31.7 | 0    | SAG      | 1219    |
| Prochlorococcus sp. HOT212_60m_826P21   | HL II       | (Biosample Acc. No.) SAMN06345459        | North Pacific Subtropical Gyre, Station ALOHA, 60m | 1263730 | 31.3 | 1422 | SAG      | 1219    |
| Prochlorococcus sp. LG                  | LL II       | NZ_JNAT00000000 / 739029033              | Sargasso Sea, 120m                                 | 1754063 | 36.4 | 1956 | complete | 167556  |
| Prochlorococcus sp. MED4 (also CMP1986) | HL I        | BX548174 / 33772317                      | Mediterranean Sea, 5m                              | 1657990 | 30.8 | 1999 | complete | 59919   |
| Prochlorococcus sp. MIT 0601            | LL III      | JNAU00000000 / 691690737                 | North Pacific, Station ALOHA 125m                  | 1707342 | 37   | 1934 | WGS      | 1499498 |

|                                              |              |                          |                                                     |         |      |      |          |         |
|----------------------------------------------|--------------|--------------------------|-----------------------------------------------------|---------|------|------|----------|---------|
| Prochlorococcus sp. MIT 0602                 | LL II / III  | JNAV00000000 / 691694844 | North Pacific, Station ALOHA 125m                   | 1750918 | 36.3 | 1998 | WGS      | 1499499 |
| Prochlorococcus sp. MIT 0603                 | LL II / III  | JNAW00000000 / 691694851 | North Pacific, Station ALOHA 125m                   | 1752482 | 36.3 | 2015 | WGS      | 1499500 |
| Prochlorococcus sp. MIT 0604                 | HL II        | CP007753 / 689266968     | North Pacific, Station ALOHA 175m                   | 1780061 | 31.2 | 2085 | complete | 1501268 |
| Prochlorococcus sp. MIT 0701                 | LL IV        | JNBA00000000 / 691706675 | South Atlantic, 150m                                | 2592571 | 53   | 3079 | WGS      | 1499502 |
| Prochlorococcus sp. MIT 0702                 | LL IV        | JNBB00000000 / 691708265 | South Atlantic, 150m                                | 2583057 | 61   | 3066 | WGS      | 1499503 |
| Prochlorococcus sp. MIT 0703                 | LL IV        | JNBC00000000 / 691714664 | South Atlantic, 150m                                | 2575057 | 61   | 3054 | WGS      | 1499504 |
| Prochlorococcus sp. MIT 0801 (also HTCC1603) | LL I         | CP007754 / 689269199     | Sargasso Sea, 40m                                   | 1929203 | 34.9 | 2287 | complete | 1501269 |
| Prochlorococcus sp. MIT0912                  | LLI          | 2681812899               | North Pacific Subtropical Gyre, Station ALOHA, 175m | 1898947 | 35   | 2206 | WGS      |         |
| Prochlorococcus sp. MIT0913                  | LLI          | 2681812900               | North Pacific Subtropical Gyre, Station ALOHA, 175m | 1877877 | 35   | 2203 | WGS      |         |
| Prochlorococcus sp. MIT0915                  | LLI          | 2681812901               | North Pacific Subtropical Gyre, Station ALOHA, 175m | 1988105 | 35   | 2252 | WGS      |         |
| Prochlorococcus sp. MIT0917                  | LLI          | 2681812859               | North Pacific Subtropical Gyre, Station ALOHA, 200m | 1924674 | 35   | 2224 | WGS      |         |
| Prochlorococcus sp. MIT0918                  | LLII/III     | 2681812902               | North Pacific Subtropical Gyre, Station ALOHA, 175m | 1789313 | 35   | 1997 | WGS      |         |
| Prochlorococcus sp. MIT0919                  | LLII/III     | 2681812903               | North Pacific Subtropical Gyre, Station ALOHA, 175m | 1716770 | 37   | 1927 | WGS      |         |
| Prochlorococcus sp. MIT1013                  | LLI          | 2681812904               | North Pacific Subtropical Gyre, Station ALOHA, 150m | 2046712 | 35   | 2428 | WGS      |         |
| Prochlorococcus sp. MIT1205                  | LLIV         | 2681813566               | North Pacific Subtropical Gyre, Station ALOHA, 175m | 2527266 | 50   | 2674 | WGS      |         |
| Prochlorococcus sp. MIT1214                  | LLI          | 2681813567               | North Pacific Subtropical Gyre, Station ALOHA, 175m | 1934849 | 35   | 2206 | WGS      |         |
| Prochlorococcus sp. MIT1223                  | Not Assigned | 2681813568               | North Pacific Subtropical Gyre, Station ALOHA, 175m | 1795922 | 36   | 1991 | WGS      |         |
| Prochlorococcus sp. MIT1227                  | LLIV         | 2681813569               | North Pacific Subtropical Gyre, Station ALOHA, 124m | 2530891 | 51   | 2760 | WGS      |         |
| Prochlorococcus sp. MIT1300                  | Not Assigned | 2681813570               | North Pacific Subtropical Gyre, Station ALOHA, 150m | 1855146 | 41   | 2020 | WGS      |         |
| Prochlorococcus sp. MIT1303                  | LLIV         | 2681812923               | North Pacific Subtropical Gyre, Station ALOHA, 150m | 2554803 | 50   | 2705 | WGS      |         |
| Prochlorococcus sp. MIT1304                  | LLII/III     | 2681813571               | North Pacific Subtropical Gyre, Station ALOHA, 150m | 1762159 | 35   | 1952 | WGS      |         |
| Prochlorococcus sp. MIT1306                  | LL IV        | LVHL01000000             | North Pacific Subtropical Gyre, Station ALOHA, 150m | 2498944 | 50.5 |      | WGS      |         |
| Prochlorococcus sp. MIT1307                  | Not Assigned | 2681813572               | North Pacific Subtropical Gyre, Station ALOHA, 150m | 2032419 | 40   | 2198 | WGS      |         |
| Prochlorococcus sp. MIT1312                  | LL IV        | LVHM01000000             | North Pacific Subtropical Gyre, Station ALOHA, 150m | 2561499 | 50.5 |      | WGS      |         |
| Prochlorococcus sp. MIT1313                  | LL IV        | LVHN01000000             | North Pacific Subtropical Gyre, Station ALOHA, 150m | 2590341 | 50   |      | WGS      |         |
| Prochlorococcus sp. MIT1314                  | HLII         | 2681813573               | North Pacific Subtropical Gyre, Station ALOHA, 150m | 1704447 | 31   | 1982 | WGS      |         |

|                              |              |                             |                                                     |         |       |      |          |        |
|------------------------------|--------------|-----------------------------|-----------------------------------------------------|---------|-------|------|----------|--------|
| Prochlorococcus sp. MIT1320  | LL IV        | LVHP01000000                | North Pacific Subtropical Gyre, Station ALOHA, 150m | 2500454 | 50.3  |      | WGS      |        |
| Prochlorococcus sp. MIT1323  | LL IV        | LVHQ01000000                | North Pacific Subtropical Gyre, Station ALOHA, 150m | 2440679 | 50.6  |      | WGS      |        |
| Prochlorococcus sp. MIT1341  | Not Assigned | 2681813574                  | North Pacific Subtropical Gyre, Station ALOHA, 150m | 1937096 | 40    | 2090 | WGS      |        |
| Prochlorococcus sp. MIT1418  | LLIV         | 2681813575                  | North Pacific Subtropical Gyre, Station ALOHA, 150m | 2598653 | 50    | 2764 | WGS      |        |
| Prochlorococcus sp. MIT1342  | LL IV        | LVHS01000000                | North Pacific Subtropical Gyre, Station ALOHA, 150m | 2548000 | 50.3  |      | WGS      |        |
| Prochlorococcus sp. MIT 9107 | HL II        | NZ_JNAI00000000 / 695325385 | Tropical Pacific, 25m                               | 1699937 | 31    | 1966 | complete | 59921  |
| Prochlorococcus sp. MIT 9116 | HL II        | NZ_JNAJ00000000 / 695315231 | Tropical Pacific, 25m                               | 1685398 | 31    | 1947 | complete | 167544 |
| Prochlorococcus sp. MIT 9123 | HL II        | NZ_JNAK00000000 / 695325219 | Tropical Pacific, 25                                | 1697748 | 31    | 1981 | complete | 167545 |
| Prochlorococcus sp. MIT 9201 | HL II        | NZ_JNAL00000000 / 695324810 | Tropical Pacific, Surface                           | 1672416 | 31.3  | 1963 | complete | 93057  |
| Prochlorococcus sp. MIT 9202 | HL II        | ACDW00000000 / 219152118    | South Pacific, 79m                                  | 1691453 | 31.14 | 2039 | WGS      | 93058  |
| Prochlorococcus sp. MIT 9211 | LL III       | CP000878 / 159887716        | Equatorial Pacific, 83m                             | 1688963 | 38.01 | 1986 | complete | 93059  |
| Prochlorococcus sp. MIT 9215 | HL II        | CP000825 / 157386913        | Equatorial Pacific, surface                         | 1738790 | 31.15 | 2076 | complete | 93060  |
| Prochlorococcus sp. MIT 9301 | HL II        | CP000576 / 126542380        | Sargasso Sea, 90m                                   | 1641879 | 31.34 | 1964 | complete | 167546 |
| Prochlorococcus sp. MIT 9302 | HL II        | NZ_JNAM00000000 / 695329408 | Sargasso Sea, 100m                                  | 1725456 | 31.1  | 1998 | complete | 74545  |
| Prochlorococcus sp. MIT 9303 | LL IV        | CP000554 / 123962000        | Sargasso Sea, 100m                                  | 2682807 | 50.01 | 3303 | complete | 59922  |
| Prochlorococcus sp. MIT 9311 | HL II        | NZ_JNAN00000000 / 739046599 | Gulf stream, 135m                                   | 1711064 | 31.2  | 1969 | complete | 167547 |
| Prochlorococcus sp. MIT 9312 | HL II        | NC_007577 / 78778385        | Gulf Stream, 135m                                   | 1709204 | 31.21 | 1857 | complete | 74546  |
| Prochlorococcus sp. MIT 9313 | LL IV        | BX548175 / 33772318         | Gulf Stream, 135m                                   | 2410873 | 50.74 | 3044 | complete | 74547  |
| Prochlorococcus sp. MIT 9314 | HL II        | NZ_JNAO00000000 / 695317421 | Gulf stream, 180m                                   | 1690556 | 31.2  | 1973 | complete | 167548 |
| Prochlorococcus sp. MIT 9321 | HL II        | NZ_JNAP00000000 / 695319270 | Equatorial Pacific, 50m                             | 1658664 | 31.2  | 1936 | complete | 167549 |
| Prochlorococcus sp. MIT 9322 | HL II        | NZ_JNAQ00000000 / 695319424 | Equatorial Pacific, Surface                         | 1657550 | 31.1  | 1939 | complete | 167550 |
| Prochlorococcus sp. MIT 9401 | HL II        | NZ_JNAR00000000 / 695325035 | Sargasso Sea, Surface                               | 1666808 | 31.2  | 1954 | complete | 167551 |
| Prochlorococcus sp. MIT 9515 | HL I         | CP000552 / 123199600        | Equatorial Pacific, 15m                             | 1704176 | 30.79 | 1991 | complete | 167542 |
| Prochlorococcus sp. NATL1A   | LL I         | CP000553 / 123959780        | Northern Atlantic, 30m                              | 1864731 | 34.98 | 2283 | complete | 167555 |
| Prochlorococcus sp. NATL2A   | LL I         | CP000095 / 154949252        | Northern Atlantic, 10m                              | 1842899 | 35.12 | 2235 | complete | 59920  |
| Prochlorococcus sp. PAC1     | LL I         | NZ_JNAX00000000 / 739026823 | North Pacific, Station ALOHA 100m                   | 1841163 | 35.2  | 2234 | complete | 59924  |

This entry is the master record for a whole genome shotgun sequencing project and contains no sequence data

|                                      |       |                                       |                                                             |         |      |      |                                    |       |  |      |
|--------------------------------------|-------|---------------------------------------|-------------------------------------------------------------|---------|------|------|------------------------------------|-------|--|------|
| Prochlorococcus sp.<br>REDSEA-S17_B1 |       | 2651870162                            | Red Sea, Saudi Arabia,<br>25m                               | 1070099 | 31   | 1471 | Metagenome-<br>assembled<br>Genome | 1218  |  |      |
| Prochlorococcus sp.<br>REDSEA-S22_B1 |       | 2651870163                            | Red Sea, Saudi Arabia,<br>10m                               | 1010391 | 31   | 1338 | Metagenome-<br>assembled<br>Genome | 1218  |  |      |
| Prochlorococcus sp.<br>REDSEA-S23_B1 |       | 2651870164                            | Red Sea, Saudi Arabia,<br>25m                               | 1058971 | 31   | 1381 | Metagenome-<br>assembled<br>Genome | 1218  |  |      |
| Prochlorococcus sp.<br>REDSEA-S28_B1 |       | 2651870165                            | Red Sea, Saudi Arabia,<br>10m                               | 926852  | 31   | 1181 | Metagenome-<br>assembled<br>Genome | 1218  |  |      |
| Prochlorococcus sp.<br>RS01          |       | (Biosample Acc. No.)<br>NZ_CP018345.1 | Red Sea, Saudi Arabia,<br>surface water                     | 1657700 | 31.4 | 1842 | SAG                                | 1219  |  |      |
| Prochlorococcus sp.<br>RS04          |       | (Biosample Acc. No.)<br>NZ_CP018346.1 | Red Sea, Saudi Arabia,<br>surface water                     | 1656320 | 31.4 | 1840 | SAG                                | 1219  |  |      |
| Prochlorococcus sp.<br>RS50          |       | (Biosample Acc. No.)<br>NZ_CP018344.1 | Red Sea, Saudi Arabia,<br>surface water                     | 1656130 | 31.4 | 1842 | SAG                                | 1219  |  |      |
| Prochlorococcus sp.<br>SB            | HL II | NZ_JNAS00000000 /<br>695322273        | Western Pacific, 40m                                        | 1669823 | 31.5 | 1911 | complete                           | 59926 |  |      |
| Prochlorococcus sp.<br>scB241_526B17 | HL II | (Biosample Acc. No.)<br>SAMN02647043  | Bermuda Atlantic Time<br>Series (BATS) station<br>site, 60m | 1107740 | 31.3 |      | SAG                                | 65.72 |  | 0.77 |
| Prochlorococcus sp.<br>scB241_526B19 | HL II | (Biosample Acc. No.)<br>SAMN02647111  | Bermuda Atlantic Time<br>Series (BATS) station<br>site, 60m | 469441  | 31.6 |      | SAG                                | 32.41 |  | 0.81 |
| Prochlorococcus sp.<br>scB241_526B22 | HL II | (Biosample Acc. No.)<br>SAMN02647112  | Bermuda Atlantic Time<br>Series (BATS) station<br>site, 60m | 934681  | 31.6 |      | SAG                                | 59.59 |  | 0.91 |
| Prochlorococcus sp.<br>scB241_526D20 | HL II | (Biosample Acc. No.)<br>SAMN02671311  | Bermuda Atlantic Time<br>Series (BATS) station<br>site, 60m | 1318930 | 31.4 |      | SAG                                | 77.63 |  | 0.54 |
| Prochlorococcus sp.<br>scB241_526K3  | HL II | (Biosample Acc. No.)<br>SAMN02671312  | Bermuda Atlantic Time<br>Series (BATS) station<br>site, 60m | 1133450 | 31.2 |      | SAG                                | 66.6  |  | 1.18 |
| Prochlorococcus sp.<br>scB241_526N5  | HL II | (Biosample Acc. No.)<br>SAMN02671313  | Bermuda Atlantic Time<br>Series (BATS) station<br>site, 60m | 489145  | 31.1 |      | SAG                                | 31.9  |  | 0    |
| Prochlorococcus sp.<br>scB241_526N9  | HL II | (Biosample Acc. No.)<br>SAMN02671314  | Bermuda Atlantic Time<br>Series (BATS) station<br>site, 60m | 1271230 | 31.2 |      | SAG                                | 72.13 |  | 0.54 |
| Prochlorococcus sp.<br>scB241_527E14 | HL II | (Biosample Acc. No.)<br>SAMN02671315  | Bermuda Atlantic Time<br>Series (BATS) station<br>site, 60m | 1108550 | 31.3 |      | SAG                                | 68.76 |  | 0.28 |
| Prochlorococcus sp.<br>scB241_527E15 | HL II | (Biosample Acc. No.)<br>SAMN02671316  | Bermuda Atlantic Time<br>Series (BATS) station<br>site, 60m | 579043  | 31.5 |      | SAG                                | 34.48 |  | 0    |
| Prochlorococcus sp.<br>scB241_527G5  | HL II | (Biosample Acc. No.)<br>SAMN02671317  | Bermuda Atlantic Time<br>Series (BATS) station<br>site, 60m | 1170830 | 31.1 |      | SAG                                | 69.31 |  | 0.41 |
| Prochlorococcus sp.<br>scB241_527I9  | HL II | (Biosample Acc. No.)<br>SAMN02671318  | Bermuda Atlantic Time<br>Series (BATS) station<br>site, 60m | 1148290 | 31.6 |      | SAG                                | 75.52 |  | 0.27 |
| Prochlorococcus sp.<br>scB241_527L15 | HL II | (Biosample Acc. No.)<br>SAMN02671319  | Bermuda Atlantic Time<br>Series (BATS) station<br>site, 60m | 1190530 | 31.5 |      | SAG                                | 70.55 |  | 1.59 |
| Prochlorococcus sp.<br>scB241_527L16 | HL II | (Biosample Acc. No.)<br>SAMN02671320  | Bermuda Atlantic Time<br>Series (BATS) station<br>site, 60m | 977191  | 31.1 |      | SAG                                | 47.41 |  | 0    |
| Prochlorococcus sp.<br>scB241_527L22 | HL II | (Biosample Acc. No.)<br>SAMN02671321  | Bermuda Atlantic Time<br>Series (BATS) station<br>site, 60m | 1517740 | 31.3 |      | SAG                                | 92.44 |  | 0.63 |

|                                   |       |                                   |                                                       |         |      |     |       |      |
|-----------------------------------|-------|-----------------------------------|-------------------------------------------------------|---------|------|-----|-------|------|
| Prochlorococcus sp. scB241_527N11 | HL II | (Biosample Acc. No.) SAMN02671322 | Bermuda Atlantic Time Series (BATS) station site, 60m | 1476940 | 31.3 | SAG | 84.56 | 1.12 |
| Prochlorococcus sp. scB241_527P5  | HL II | (Biosample Acc. No.) SAMN02671323 | Bermuda Atlantic Time Series (BATS) station site, 60m | 1464890 | 31.3 | SAG | 87.76 | 1    |
| Prochlorococcus sp. scB241_528J14 | HL II | (Biosample Acc. No.) SAMN02671324 | Bermuda Atlantic Time Series (BATS) station site, 60m | 1183090 | 31.1 | SAG | 64.86 | 1.22 |
| Prochlorococcus sp. scB241_528J8  | HL II | (Biosample Acc. No.) SAMN02671325 | Bermuda Atlantic Time Series (BATS) station site, 60m | 1577550 | 31.3 | SAG | 92.62 | 1.39 |
| Prochlorococcus sp. scB241_528K19 | HL II | (Biosample Acc. No.) SAMN02671326 | Bermuda Atlantic Time Series (BATS) station site, 60m | 1448090 | 31.3 | SAG | 86.59 | 1.09 |
| Prochlorococcus sp. scB241_528N17 | HL II | (Biosample Acc. No.) SAMN02671327 | Bermuda Atlantic Time Series (BATS) station site, 60m | 1530060 | 31.3 | SAG | 93.43 | 0.41 |
| Prochlorococcus sp. scB241_528N20 | HL II | (Biosample Acc. No.) SAMN02671328 | Bermuda Atlantic Time Series (BATS) station site, 60m | 1144510 | 31.4 | SAG | 72.42 | 1.18 |
| Prochlorococcus sp. scB241_528N8  | HL II | (Biosample Acc. No.) SAMN02671329 | Bermuda Atlantic Time Series (BATS) station site, 60m | 1378440 | 31.3 | SAG | 81.11 | 0.63 |
| Prochlorococcus sp. scB241_528O2  | HL II | (Biosample Acc. No.) SAMN02671330 | Bermuda Atlantic Time Series (BATS) station site, 60m | 1531690 | 31   | SAG | 91.3  | 0.36 |
| Prochlorococcus sp. scB241_528P14 | HL II | (Biosample Acc. No.) SAMN02671331 | Bermuda Atlantic Time Series (BATS) station site, 60m | 1104130 | 31.1 | SAG | 41.38 | 0    |
| Prochlorococcus sp. scB241_528P18 | HL II | (Biosample Acc. No.) SAMN02671332 | Bermuda Atlantic Time Series (BATS) station site, 60m | 1464300 | 31.3 | SAG | 86.6  | 0.56 |
| Prochlorococcus sp. scB241_529B19 | HL II | (Biosample Acc. No.) SAMN02671333 | Bermuda Atlantic Time Series (BATS) station site, 60m | 1480310 | 31.5 | SAG | 88    | 1.18 |
| Prochlorococcus sp. scB241_529C4  | HL II | (Biosample Acc. No.) SAMN02671334 | Bermuda Atlantic Time Series (BATS) station site, 60m | 1606810 | 31.3 | SAG | 96.38 | 0.27 |
| Prochlorococcus sp. scB241_529D18 | HL II | (Biosample Acc. No.) SAMN02671335 | Bermuda Atlantic Time Series (BATS) station site, 60m | 1511450 | 31.4 | SAG | 90.13 | 0.68 |
| Prochlorococcus sp. scB241_529J11 | HL II | (Biosample Acc. No.) SAMN02671336 | Bermuda Atlantic Time Series (BATS) station site, 60m | 1338230 | 31.5 | SAG | 84.01 | 1.04 |
| Prochlorococcus sp. scB241_529J15 | HL II | (Biosample Acc. No.) SAMN02671337 | Bermuda Atlantic Time Series (BATS) station site, 60m | 1601050 | 31.2 | SAG | 94.57 | 0.27 |
| Prochlorococcus sp. scB241_529J16 | HL II | (Biosample Acc. No.) SAMN02671338 | Bermuda Atlantic Time Series (BATS) station site, 60m | 951023  | 31.8 | SAG | 63    | 1.63 |
| Prochlorococcus sp. scB241_529O19 | HL II | (Biosample Acc. No.) SAMN02671339 | Bermuda Atlantic Time Series (BATS) station site, 60m | 1305640 | 31.7 | SAG | 87.14 | 0.54 |
| Prochlorococcus sp. scB243_495D8  | HL II | (Biosample Acc. No.) SAMN02671340 | Bermuda Atlantic Time Series (BATS) station site, 60m | 1227850 | 31.4 | SAG | 79.89 | 0.27 |
| Prochlorococcus sp. scB243_495G23 | HL II | (Biosample Acc. No.) SAMN02671341 | Bermuda Atlantic Time Series (BATS) station site, 60m | 1452950 | 31.3 | SAG | 85.55 | 0.14 |
| Prochlorococcus sp. scB243_495I8  | HL II | (Biosample Acc. No.) SAMN02671342 | Bermuda Atlantic Time Series (BATS) station site, 60m | 370192  | 32.4 | SAG | 22.42 | 0.36 |
| Prochlorococcus sp. scB243_495K23 | HL II | (Biosample Acc. No.) SAMN02671343 | Bermuda Atlantic Time Series (BATS) station site, 60m | 1620140 | 31.3 | SAG | 96.92 | 0    |
| Prochlorococcus sp. scB243_495L20 | HL II | (Biosample Acc. No.) SAMN02671344 | Bermuda Atlantic Time Series (BATS) station site, 60m | 1569360 | 31.3 | SAG | 97.74 | 0.54 |
| Prochlorococcus sp. scB243_495N16 | HL II | (Biosample Acc. No.) SAMN02671345 | Bermuda Atlantic Time Series (BATS) station site, 60m | 1434400 | 31.3 | SAG | 85.6  | 0.86 |
| Prochlorococcus sp. scB243_495N3  | HL II | (Biosample Acc. No.) SAMN02671346 | Bermuda Atlantic Time Series (BATS) station site, 60m | 901033  | 31.3 | SAG | 57.07 | 1.27 |



|                                   |       |                                   |                                                       |         |      |     |       |      |
|-----------------------------------|-------|-----------------------------------|-------------------------------------------------------|---------|------|-----|-------|------|
| Prochlorococcus sp. scB243_495N4  | HL II | (Biosample Acc. No.) SAMN02671347 | Bermuda Atlantic Time Series (BATS) station site, 60m | 1192260 | 31.4 | SAG | 62.77 | 1.27 |
| Prochlorococcus sp. scB243_495P20 | HL II | (Biosample Acc. No.) SAMN02671348 | Bermuda Atlantic Time Series (BATS) station site, 60m | 986037  | 31.3 | SAG | 62.77 | 0.82 |
| Prochlorococcus sp. scB243_496A2  | HL II | (Biosample Acc. No.) SAMN02671349 | Bermuda Atlantic Time Series (BATS) station site, 60m | 1439940 | 31.4 | SAG | 91.58 | 2.17 |
| Prochlorococcus sp. scB243_496E10 | HL II | (Biosample Acc. No.) SAMN02671350 | Bermuda Atlantic Time Series (BATS) station site, 60m | 1097830 | 31.3 | SAG | 65.07 | 0.33 |
| Prochlorococcus sp. scB243_496G15 | HL II | (Biosample Acc. No.) SAMN02671351 | Bermuda Atlantic Time Series (BATS) station site, 60m | 1378310 | 31.2 | SAG | 81.7  | 2.17 |
| Prochlorococcus sp. scB243_496M6  | HL II | (Biosample Acc. No.) SAMN02671352 | Bermuda Atlantic Time Series (BATS) station site, 60m | 977410  | 31.3 | SAG | 58.92 | 1.22 |
| Prochlorococcus sp. scB243_496N4  | HL II | (Biosample Acc. No.) SAMN02671353 | Bermuda Atlantic Time Series (BATS) station site, 60m | 1453960 | 31.4 | SAG | 90.76 | 0.95 |
| Prochlorococcus sp. scB243_497E17 | HL II | (Biosample Acc. No.) SAMN02671354 | Bermuda Atlantic Time Series (BATS) station site, 60m | 552203  | 31.8 | SAG | 35.19 | 0.82 |
| Prochlorococcus sp. scB243_497I20 | HL II | (Biosample Acc. No.) SAMN02671355 | Bermuda Atlantic Time Series (BATS) station site, 60m | 1020800 | 31.6 | SAG | 71.42 | 0.66 |
| Prochlorococcus sp. scB243_497J18 | HL II | (Biosample Acc. No.) SAMN02671356 | Bermuda Atlantic Time Series (BATS) station site, 60m | 1401750 | 31.3 | SAG | 82.97 | 1.14 |
| Prochlorococcus sp. scB243_497N18 | HL II | (Biosample Acc. No.) SAMN02671357 | Bermuda Atlantic Time Series (BATS) station site, 60m | 675744  | 31.8 | SAG | 38.43 | 0    |
| Prochlorococcus sp. scB243_498A3  | HL II | (Biosample Acc. No.) SAMN02671358 | Bermuda Atlantic Time Series (BATS) station site, 60m | 1472540 | 31.3 | SAG | 92.07 | 0.59 |
| Prochlorococcus sp. scB243_498B22 | HL II | (Biosample Acc. No.) SAMN02671359 | Bermuda Atlantic Time Series (BATS) station site, 60m | 1476140 | 31.2 | SAG | 91.98 | 0.63 |
| Prochlorococcus sp. scB243_498B23 | HL II | (Biosample Acc. No.) SAMN02671360 | Bermuda Atlantic Time Series (BATS) station site, 60m | 1236610 | 31.1 | SAG | 76.09 | 1.09 |
| Prochlorococcus sp. scB243_498C16 | HL II | (Biosample Acc. No.) SAMN02671361 | Bermuda Atlantic Time Series (BATS) station site, 60m | 1477230 | 31.2 | SAG | 92.45 | 0.23 |
| Prochlorococcus sp. scB243_498F21 | HL II | (Biosample Acc. No.) SAMN02671362 | Bermuda Atlantic Time Series (BATS) station site, 60m | 1398810 | 31.1 | SAG | 83.79 | 1.31 |
| Prochlorococcus sp. scB243_498G3  | HL II | (Biosample Acc. No.) SAMN02671363 | Bermuda Atlantic Time Series (BATS) station site, 60m | 1054290 | 31.1 | SAG | 63.65 | 0.69 |
| Prochlorococcus sp. scB243_498I20 | HL II | (Biosample Acc. No.) SAMN02671364 | Bermuda Atlantic Time Series (BATS) station site, 60m | 1589860 | 31.3 | SAG | 94.63 | 0    |
| Prochlorococcus sp. scB243_498J20 | HL II | (Biosample Acc. No.) SAMN02671365 | Bermuda Atlantic Time Series (BATS) station site, 60m | 860969  | 31.3 | SAG | 47.99 | 1.22 |
| Prochlorococcus sp. scB243_498L10 | HL II | (Biosample Acc. No.) SAMN02671366 | Bermuda Atlantic Time Series (BATS) station site, 60m | 1348560 | 31.1 | SAG | 78.76 | 0.82 |
| Prochlorococcus sp. scB243_498M14 | HL II | (Biosample Acc. No.) SAMN02671367 | Bermuda Atlantic Time Series (BATS) station site, 60m | 949651  | 30.9 | SAG | 41.38 | 1.72 |
| Prochlorococcus sp. scB243_498N4  | HL II | (Biosample Acc. No.) SAMN02671368 | Bermuda Atlantic Time Series (BATS) station site, 60m | 1412290 | 31.3 | SAG | 85.51 | 0.54 |
| Prochlorococcus sp. scB243_498N8  | HL II | (Biosample Acc. No.) SAMN02671369 | Bermuda Atlantic Time Series (BATS) station site, 60m | 907618  | 31.1 | SAG | 53.86 | 0.69 |
| Prochlorococcus sp. scB243_498P15 | HL II | (Biosample Acc. No.) SAMN02671370 | Bermuda Atlantic Time Series (BATS) station site, 60m | 1460430 | 31.5 | SAG | 93.61 | 0.82 |
| Prochlorococcus sp. scB243_498P3  | HL II | (Biosample Acc. No.) SAMN02671371 | Bermuda Atlantic Time Series (BATS) station site, 60m | 1432250 | 31.1 | SAG | 79.71 | 1.49 |

|                                    |       |                                   |                                                       |         |      |     |       |      |
|------------------------------------|-------|-----------------------------------|-------------------------------------------------------|---------|------|-----|-------|------|
| Prochlorococcus sp. scB245a_518A17 | HL II | (Biosample Acc. No.) SAMN02671372 | Bermuda Atlantic Time Series (BATS) station site, 60m | 1625270 | 31.3 | SAG | 97.39 | 0.77 |
| Prochlorococcus sp. scB245a_518A6  | HL II | (Biosample Acc. No.) SAMN02671373 | Bermuda Atlantic Time Series (BATS) station site, 60m | 1372700 | 31.4 | SAG | 83.11 | 1.36 |
| Prochlorococcus sp. scB245a_518D8  | HL II | (Biosample Acc. No.) SAMN02671374 | Bermuda Atlantic Time Series (BATS) station site, 60m | 1439680 | 32.1 | SAG | 27.59 | 0    |
| Prochlorococcus sp. scB245a_518E10 | HL II | (Biosample Acc. No.) SAMN02671375 | Bermuda Atlantic Time Series (BATS) station site, 60m | 1327380 | 31.5 | SAG | 81.97 | 0.14 |
| Prochlorococcus sp. scB245a_518I6  | HL II | (Biosample Acc. No.) SAMN02671376 | Bermuda Atlantic Time Series (BATS) station site, 60m | 1368540 | 31.5 | SAG | 88.29 | 0.28 |
| Prochlorococcus sp. scB245a_518J7  | HL II | (Biosample Acc. No.) SAMN02671377 | Bermuda Atlantic Time Series (BATS) station site, 60m | 1382480 | 31.5 | SAG | 83.53 | 1.31 |
| Prochlorococcus sp. scB245a_518K17 | HL II | (Biosample Acc. No.) SAMN02671378 | Bermuda Atlantic Time Series (BATS) station site, 60m | 1405160 | 31.3 | SAG | 83.61 | 1.04 |
| Prochlorococcus sp. scB245a_518O7  | HL II | (Biosample Acc. No.) SAMN02671379 | Bermuda Atlantic Time Series (BATS) station site, 60m | 1469990 | 31.2 | SAG | 82.84 | 0.14 |
| Prochlorococcus sp. scB245a_519A13 | HL II | (Biosample Acc. No.) SAMN02671380 | Bermuda Atlantic Time Series (BATS) station site, 60m | 1149560 | 31.1 | SAG | 65.49 | 0.36 |
| Prochlorococcus sp. scB245a_519B7  | HL II | (Biosample Acc. No.) SAMN02671381 | Bermuda Atlantic Time Series (BATS) station site, 60m | 698939  | 31.5 | SAG | 31.03 | 0    |
| Prochlorococcus sp. scB245a_519C7  | HL II | (Biosample Acc. No.) SAMN02671382 | Bermuda Atlantic Time Series (BATS) station site, 60m | 1366170 | 31.4 | SAG | 87.36 | 1.31 |
| Prochlorococcus sp. scB245a_519D13 | HL II | (Biosample Acc. No.) SAMN02671383 | Bermuda Atlantic Time Series (BATS) station site, 60m | 1409850 | 31.4 | SAG | 85.01 | 1.36 |
| Prochlorococcus sp. scB245a_519E23 | HL II | (Biosample Acc. No.) SAMN02671384 | Bermuda Atlantic Time Series (BATS) station site, 60m | 1218090 | 31.5 | SAG | 75.32 | 0.14 |
| Prochlorococcus sp. scB245a_519G16 | HL II | (Biosample Acc. No.) SAMN02671385 | Bermuda Atlantic Time Series (BATS) station site, 60m | 1310230 | 31.3 | SAG | 77.45 | 1.02 |
| Prochlorococcus sp. scB245a_519L21 | HL II | (Biosample Acc. No.) SAMN02671386 | Bermuda Atlantic Time Series (BATS) station site, 60m | 1431710 | 31.2 | SAG | 86.19 | 1.36 |
| Prochlorococcus sp. scB245a_519O11 | HL II | (Biosample Acc. No.) SAMN02671387 | Bermuda Atlantic Time Series (BATS) station site, 60m | 1284450 | 31.2 | SAG | 75.33 | 1.04 |
| Prochlorococcus sp. scB245a_519O21 | HL II | (Biosample Acc. No.) SAMN02671388 | Bermuda Atlantic Time Series (BATS) station site, 60m | 1264470 | 31.6 | SAG | 83.7  | 0.54 |
| Prochlorococcus sp. scB245a_520B18 | HL II | (Biosample Acc. No.) SAMN02671389 | Bermuda Atlantic Time Series (BATS) station site, 60m | 1430670 | 31.3 | SAG | 84.06 | 1.45 |
| Prochlorococcus sp. scB245a_520D2  | HL II | (Biosample Acc. No.) SAMN02671390 | Bermuda Atlantic Time Series (BATS) station site, 60m | 1019840 | 31.4 | SAG | 60.78 | 0.68 |
| Prochlorococcus sp. scB245a_520E22 | HL II | (Biosample Acc. No.) SAMN02671391 | Bermuda Atlantic Time Series (BATS) station site, 60m | 1136820 | 31.2 | SAG | 65.53 | 0.14 |
| Prochlorococcus sp. scB245a_520F22 | HL II | (Biosample Acc. No.) SAMN02671392 | Bermuda Atlantic Time Series (BATS) station site, 60m | 1353700 | 31.5 | SAG | 87.45 | 0.41 |
| Prochlorococcus sp. scB245a_520K10 | HL II | (Biosample Acc. No.) SAMN02671393 | Bermuda Atlantic Time Series (BATS) station site, 60m | 1453630 | 31.5 | SAG | 92.16 | 1.22 |
| Prochlorococcus sp. scB245a_520M11 | HL II | (Biosample Acc. No.) SAMN02671394 | Bermuda Atlantic Time Series (BATS) station site, 60m | 400975  | 31.3 | SAG | 8.62  | 0    |
| Prochlorococcus sp. scB245a_521A19 | HL II | (Biosample Acc. No.) SAMN02671395 | Bermuda Atlantic Time Series (BATS) station site, 60m | 1160540 | 31.1 | SAG | 70.99 | 1.68 |
| Prochlorococcus sp. scB245a_521B10 | HL II | (Biosample Acc. No.) SAMN02671396 | Bermuda Atlantic Time Series (BATS) station site, 60m | 1555090 | 31.2 | SAG | 93.57 | 1.09 |

|                                           |             |                                   |                                                       |         |       |      |                             |         |      |
|-------------------------------------------|-------------|-----------------------------------|-------------------------------------------------------|---------|-------|------|-----------------------------|---------|------|
| Prochlorococcus sp. scB245a_521C8         | HL II       | (Biosample Acc. No.) SAMN02671397 | Bermuda Atlantic Time Series (BATS) station site, 60m | 966833  | 31.3  |      | SAG                         | 59.11   | 2.26 |
| Prochlorococcus sp. scB245a_521K15        | HL II       | (Biosample Acc. No.) SAMN02671398 | Bermuda Atlantic Time Series (BATS) station site, 60m | 1482920 | 31.3  |      | SAG                         | 88.9    | 0.54 |
| Prochlorococcus sp. scB245a_521M10        | HL II       | (Biosample Acc. No.) SAMN02671399 | Bermuda Atlantic Time Series (BATS) station site, 60m | 1142710 | 31    |      | SAG                         | 44.83   | 0    |
| Prochlorococcus sp. scB245a_521N3         | HL II       | (Biosample Acc. No.) SAMN02671400 | Bermuda Atlantic Time Series (BATS) station site, 60m | 621899  | 31.6  |      | SAG                         | 37.41   | 1.49 |
| Prochlorococcus sp. scB245a_521N5         | HL II       | (Biosample Acc. No.) SAMN02671401 | Bermuda Atlantic Time Series (BATS) station site, 60m | 830606  | 31.4  |      | SAG                         | 44.75   | 1.07 |
| Prochlorococcus sp. scB245a_521O20        | HL II       | (Biosample Acc. No.) SAMN02671402 | Bermuda Atlantic Time Series (BATS) station site, 60m | 1516360 | 31.2  |      | SAG                         | 87.68   | 0.68 |
| Prochlorococcus sp. scB245a_521O23        | HL II       | (Biosample Acc. No.) SAMN02671403 | Bermuda Atlantic Time Series (BATS) station site, 60m | 895440  | 31.7  |      | SAG                         | 59.78   | 1.46 |
| Prochlorococcus sp. SS120 (also CCMP1375) | LL II       | AE017126 / 33238865               | Sargasso Sea, 120m                                    | 1751080 | 36.44 | 2016 | complete                    | 167539  |      |
| Prochlorococcus sp. SS2                   | LL II       | NZ_JNAY0000000 / 739015208        | Sargasso Sea, 120                                     | 1752772 | 36.4  | 1972 | complete                    | 167552  |      |
| Prochlorococcus sp. SS35                  | LL II       | NZ_JNAZ00000000 / 739028712       | Sargasso Sea, 120                                     | 1751015 | 36.5  | 1959 | complete                    | 167553  |      |
| Prochlorococcus sp. SS51                  | LL II       | NZ_JNBD00000000 / 739011222       | Sargasso Sea, 120                                     | 1746977 | 36.4  | 1958 | complete                    | 167554  |      |
| Prochlorococcus sp. SS52                  | LL II / III | JNBE00000000 / 691714834          | Sargasso Sea, 120                                     | 1754053 | 36.4  | 1987 | complete                    | 1499501 |      |
| Prochlorococcus sp. TMED223               |             | (Biosample Acc. No.) SAMN06972077 | Mediterranean Sea                                     | 1718360 | 47.6  | 1806 | Metagenome-assembled Genome | 1986612 |      |
| Prochlorococcus sp. W10                   | HL IV       | ALPH00000000                      | Equatorial Pacific Ocean, 15m                         | 561998  | 31    | 1051 | SAG                         | 613201  |      |
| Prochlorococcus sp. W11                   | HL IV       | ALPI00000000                      | Equatorial Pacific Ocean, 15m                         | 766829  | 31    | 968  | SAG                         | 613202  |      |
| Prochlorococcus sp. W12                   | HL IV       | ALPJ00000000                      | Equatorial Pacific Ocean, 15m                         | 423437  | 30    | 754  | SAG                         | 613203  |      |
| Prochlorococcus sp. W2                    | HL IV       | ALPB00000000                      | Equatorial Pacific Ocean, 15m                         | 1266767 | 30    | 1581 | SAG                         | 1203261 |      |
| Prochlorococcus sp. W3                    | HL III      | ALPC00000000                      | Equatorial Pacific Ocean, 15m                         | 339045  | 31    | 592  | SAG                         | 569152  |      |
| Prochlorococcus sp. W4                    | HL IV       | ALPD00000000                      | Equatorial Pacific Ocean, 15m                         | 765485  | 30    | 1046 | SAG                         | 569153  |      |
| Prochlorococcus sp. W5                    | HL III      | ALPL00000000                      | Equatorial Pacific Ocean, 15m                         | 99467   | 30    | 204  | SAG                         | 569154  |      |
| Prochlorococcus sp. W7                    | HL III      | ALPE00000000                      | Equatorial Pacific Ocean, 15m                         | 905221  | 31    | 1135 | SAG                         | 613198  |      |
| Prochlorococcus sp. W8                    | HL III      | ALPF00000000                      | Equatorial Pacific Ocean, 15m                         | 841756  | 31    | 979  | SAG                         | 613199  |      |
| Prochlorococcus sp. W9                    | HL III      | ALPG00000000                      | Equatorial Pacific Ocean, 15m                         | 420150  | 31    | 741  | SAG                         | 613200  |      |

| (Marine) Synechococcus             | Clade | Sub-clade | Accession number / GI             | Isolation Site                                      | Assembled Sequence Size (bp) | GC Content (%) | Num Genes | Genome Status | NCBI Taxonomy ID | Comments |
|------------------------------------|-------|-----------|-----------------------------------|-----------------------------------------------------|------------------------------|----------------|-----------|---------------|------------------|----------|
| Synechococcus bacterium JGI 01_K19 |       |           | (Biosample Acc. No.) SAMN07626391 | North Pacific Subtropical Gyre, Station ALOHA, 25 m | 1140941                      | 59             | 1347      |               | 2035229          |          |

|                                    |      |      |                                   |                                                                                      |         |       |      |          |         |
|------------------------------------|------|------|-----------------------------------|--------------------------------------------------------------------------------------|---------|-------|------|----------|---------|
| Synechococcus bacterium JGI 01_L10 |      |      | (Biosample Acc. No.) SAMN07626390 | North Pacific Subtropical Gyre, Station ALOHA, 25 m                                  | 843611  | 60    | 1057 |          | 2035228 |
| Synechococcus bacterium JGI 01_L14 |      |      | 2739367788                        | North Pacific Subtropical Gyre, Station ALOHA, 25 m                                  | 486181  | 57    | 635  | SAG      | 1129    |
| Synechococcus bacterium JGI 01_L16 |      |      | 2738541244                        | North Pacific Subtropical Gyre, Station ALOHA, 25 m                                  | 608306  | 59    | 727  | SAG      | 1129    |
| Synechococcus bacterium JGI 01_L19 |      |      | 2724679895                        | North Pacific Subtropical Gyre, Station ALOHA, 25 m                                  | 465766  | 60    | 597  | SAG      | 1129    |
| Synechococcus bacterium JGI 01_L22 |      |      | (Biosample Acc. No.) SAMN07626388 | North Pacific Subtropical Gyre, Station ALOHA, 25 m                                  | 750528  | 58    | 880  |          | 2035233 |
| Synechococcus bacterium JGI 01_L7  |      |      | (Biosample Acc. No.) SAMN07626392 | North Pacific Subtropical Gyre, Station ALOHA, 25 m                                  | 1385468 | 58    | 1690 |          | 2035234 |
| Synechococcus bacterium JGI 02_L19 |      |      | (Biosample Acc. No.) SAMN07626395 | North Pacific Subtropical Gyre, Station ALOHA, 125 m                                 | 1780813 | 54    | 2113 |          | 2035227 |
| Synechococcus sp. BL107            | IIId | 5.1  | NZ_AATZ00000000 / 116072915       | Blanes Bay, Mediterranean Sea, 100m                                                  | 2283377 | 54    | 2555 | WGS      | 313625  |
| Synechococcus sp. BS55D            |      |      | NZ_PHQT00000000.1                 | Black Sea                                                                            | 2235220 | 61.6  | 2314 |          |         |
| Synechococcus sp. BS56D            |      |      | NZ_PHQU00000000.1                 | Black Sea                                                                            | 2303820 | 61.2  |      |          |         |
| Synechococcus sp. CB0101           |      | 5.2  | NZ_ADXL00000000 / 317512211       | Chesapeake Bay,                                                                      | 2686395 | 64    | 3049 | WGS      | 232348  |
| Synechococcus sp. CB0205           |      | 5.2  | NZ_ADXM00000000 / 317512116       | Chesapeake Bay,                                                                      | 2427308 | 63    | 2766 | WGS      | 232363  |
| Synechococcus sp. CC9311           | IIId | 5.1  | NC_008319 / 113952711             | California current, Pacific (coastal), 95m                                           | 2606748 | 52.45 | 2761 | complete | 64471   |
| Synechococcus sp. CC9605           | IIIC | 5.1A | NC_007516 / 78211558              | California current, Pacific (oligotrophic), 51m                                      | 2510659 | 59.22 | 2761 | complete | 110662  |
| Synechococcus sp. CC9616           |      |      | (Biosample Acc. No.) SAMN02597268 | California Current                                                                   | 2645910 | 56.5  | 2803 |          |         |
| Synechococcus sp. CC9616           |      | 5.1  | AZXL00000000                      | Eastern Pacific Ocean                                                                | 2645910 | 56.52 | 2958 | WGS      |         |
| Synechococcus sp. CC9902           | IIId | 5.1  | NC_007513 / 78183584              | California current, Pacific (oligotrophic), 5m                                       | 2234828 | 54.16 | 2410 | complete | 316279  |
| Synechococcus sp. KORDI-100        |      |      | CP006269 / 670925746              | Seawater, Pacific Ocean                                                              | 2789000 | 57    | 3058 | complete | 1280380 |
| Synechococcus sp. KORDI-49         |      |      | CP006270 / 670928808              | Seawater, East China Sea                                                             | 2585813 | 61    | 2717 | complete | 585423  |
| Synechococcus sp. KORDI-52         |      |      | CP006271 / 670931543              | Seawater, East China Sea                                                             | 2572069 | 59    | 2823 | complete | 585425  |
| Synechococcus sp. MIT S9504        | 5.1B |      | LVHT00000000                      | North Pacific Subtropical Gyre, Station ALOHA, 150m                                  | 3087290 | 55.4  | 3354 |          |         |
| Synechococcus sp. MIT S9508        | 5.1B |      | LVHU01000000                      | North Pacific Subtropical Gyre, Station ALOHA, 150m                                  | 2502430 | 56    | 2735 |          |         |
| Synechococcus sp. MIT S9509        | 5.1B |      | LVHV01000000                      | North Pacific Subtropical Gyre, Station ALOHA, 150m                                  | 3087930 | 55.4  | 3381 |          |         |
| Synechococcus sp. NKBG042902       |      |      | (Biosample Acc. No.) SAMD00000348 | coastal areas in Nagasaki, Japan                                                     | 3319480 | 49.4  | 3228 |          |         |
| Synechococcus sp. NKBG15041c       |      |      | (Biosample Acc. No.) SAMD00036772 | coastal seawater at Okinawa prefecture in Japan                                      | 3180040 | 49.3  | 3020 |          |         |
| Synechococcus sp. OG1              |      |      | NZ_FXBO00000000                   | Marine cyanobacterial communities from the University of California, Santa Cruz, USA | 3433936 | 49    | 3277 | WGS      | 1938863 |

|                                 |      |     |                                   |                                                                                             |         |       |      |                             |         |                                         |
|---------------------------------|------|-----|-----------------------------------|---------------------------------------------------------------------------------------------|---------|-------|------|-----------------------------|---------|-----------------------------------------|
| Synechococcus sp. OG1           |      |     | (Biosample Acc. No.) SAMN06272755 | Sea water, Santa Cruz, USA                                                                  | 3433940 | 49.2  | 3277 | WGS                         | 1938863 |                                         |
| Synechococcus sp. PCC 7002      |      |     | NC_010475 / 170076636             | Isolated from a mud sample that came from the fish pens from Magueyes Island in Puerto Rico | 3409935 | 49    | 3237 | complete                    | 32049   |                                         |
| Synechococcus sp. PCC 73109     |      |     | GCA_001521855.1                   |                                                                                             | 3298680 | 49.33 | 3029 |                             |         |                                         |
| Synechococcus sp. RCC307        | IIb  | 5.3 | NC_009482 / 148241099             | Mediterranean Sea, 15m                                                                      | 2224914 | 60.84 | 2588 | complete                    | 316278  |                                         |
| Synechococcus sp. REDSEA-S01_B1 |      |     | (Biosample Acc. No.) SAMN04534664 | Red Sea                                                                                     | 1799130 | 62.8  |      |                             |         |                                         |
| Synechococcus sp. REDSEA-S02_B4 |      |     | (Biosample Acc. No.) SAMN04534665 | Red Sea                                                                                     | 1776300 | 62.8  |      |                             |         |                                         |
| Synechococcus sp. RS9916        | IIId | 5.1 | AAUA01000001 / 116068221          | Gulf of Aqaba, Red Sea, in front of Eilat, 10m                                              | 2664465 | 59.81 | 3010 | WGS                         | 221359  |                                         |
| Synechococcus sp. RS9917        | I    | 5.1 | AANP01000001 / 86168751           | Gulf of Aqaba, Red Sea, in front of Eilat, 10m                                              | 2579542 | 64.46 | 2822 | WGS                         | 221360  |                                         |
| Synechococcus sp. SynAce01      |      |     | CP018091                          | Antarctica: Ace Lake, Vestfold Hills                                                        | 2750634 | 64    | 2783 | complete                    | 1916956 | Available in IMG/ER under ID 2718218441 |
| Synechococcus sp. TMED155       |      |     | (Biosample Acc. No.) SAMN06972009 | Mediterranean Sea                                                                           | 1401200 | 62.2  | 1572 | Metagenome-assembled Genome |         |                                         |
| Synechococcus sp. TMED169       |      |     | (Biosample Acc. No.) SAMN06972023 | Mediterranean Sea                                                                           | 1521240 | 57.9  | 1751 | Metagenome-assembled Genome |         |                                         |
| Synechococcus sp. TMED185       |      |     | (Biosample Acc. No.) SAMN06972039 | Mediterranean Sea                                                                           | 1424570 | 61.1  | 1629 | Metagenome-assembled Genome |         |                                         |
| Synechococcus sp. TMED187       |      |     | (Biosample Acc. No.) SAMN06972041 | Mediterranean Sea                                                                           | 1839990 | 59.6  | 1926 | Metagenome-assembled Genome |         |                                         |
| Synechococcus sp. TMED19        |      |     | (Biosample Acc. No.) SAMN06971873 | Mediterranean Sea                                                                           | 2074880 | 60.1  | 2297 | Metagenome-assembled Genome |         |                                         |
| Synechococcus sp. TMED20        |      |     | (Biosample Acc. No.) SAMN06971874 | Mediterranean Sea                                                                           | 3607270 | 53.7  | 3786 | Metagenome-assembled Genome |         |                                         |
| Synechococcus sp. TMED205       |      |     | (Biosample Acc. No.) SAMN06972059 | Mediterranean Sea                                                                           | 1280390 | 63.1  | 1394 | Metagenome-assembled Genome |         |                                         |
| Synechococcus sp. TMED66        |      |     | (Biosample Acc. No.) SAMN06971920 | Mediterranean Sea                                                                           | 2153440 | 53.8  | 2390 | Metagenome-assembled Genome |         |                                         |
| Synechococcus sp. TMED90        |      |     | (Biosample Acc. No.) SAMN06971944 | Mediterranean Sea                                                                           | 1781050 | 59.4  | 1969 | Metagenome-assembled Genome |         |                                         |
| Synechococcus sp. UW105         | XVI  | 5.1 | (Biosample Acc. No.) SAMEA4707922 | Atlantic Ocean, Sargasso Sea                                                                | 2659417 | 57.5  | 2807 | WGS                         | 337067  |                                         |
| Synechococcus sp. UW69          | XV   | 5.1 | (Biosample Acc. No.) SAMEA4707923 | Atlantic Ocean, Sargasso Sea                                                                | 2372121 | 58.7  | 2556 | WGS                         | 368493  |                                         |
| Synechococcus sp. WH5701        | I    | 5.2 | AANO01000001 / 87284397           | Long Island Sound, USA,                                                                     | 3043834 | 65.38 | 3403 | WGS                         | 69042   |                                         |
| Synechococcus sp. WH7803        | IIIA | 5.1 | NC_009481 / 148238336             | Sargasso Sea, 25m                                                                           | 2366980 | 60.24 | 1    | complete                    | 32051   |                                         |
| Synechococcus sp. WH7803        |      |     | (Biosample Acc. No.) SAMEA3138264 | Bermuda Atlantic Time Series (BATS) station site, 60m                                       | 2366980 | 60.2  | 2528 |                             |         |                                         |
| Synechococcus sp. WH7805        | II   | 5.1 | AAOK01000001 / 88788291           | Sargasso Sea, 95m                                                                           | 2620367 | 57.63 | 2937 | WGS                         | 59931   |                                         |
| Synechococcus sp. WH8016        | Ib   | 5.1 | NZ_AGIK00000000 / 352097207       | Woods Hole, USA                                                                             | 2706690 | 54    | 3046 | WGS                         | 166318  |                                         |
| Synechococcus sp. WH8020        |      |     | (Biosample Acc. No.) SAMN03436066 | North Atlantic                                                                              | 2661170 | 53.1  | 2814 |                             |         |                                         |

Has been renamed from Synechococcus (published name) to Prochlorococcus based on 16S tree from Phil Hugenholz

|                                         |              |              |                                   |                                              |         |       |      |                             |          |
|-----------------------------------------|--------------|--------------|-----------------------------------|----------------------------------------------|---------|-------|------|-----------------------------|----------|
| Synechococcus sp. WH8101                |              |              | 2837243552                        | Coastal seawater collected at Woods Hole, MA | 2630292 | 63.34 | 2908 | WGS                         | 59932    |
| Synechococcus sp. WH8102                | IIIc         | 5.1          | NC_005070 / 33864539              | Sargasso Sea                                 | 2434428 | 59.41 | 2588 | complete                    | 80000251 |
| Synechococcus sp. WH8103                |              |              | (Biosample Acc. No.) SAMEA3233744 | Open Ocean                                   | 2429690 | 59.5  | 2602 |                             |          |
| Synechococcus sp. WH8109                | IIa          | 5.1          | CP006882 / 572996165              | Sargasso Sea,                                | 2111515 | 60    | 2713 | complete                    | 166314   |
| Unclassified Synechococcus Bin 27       |              |              | 2651870080                        | Northern Gulf of Mexico, 16m                 | 1701602 | 62    | 2161 | Metagenome-assembled Genome | 1129     |
| Unclassified Synechococcus Bin 28       |              |              | 2651870082                        | Northern Gulf of Mexico, 16m                 | 1175935 | 62    | 1532 | Metagenome-assembled Genome |          |
| Unclassified Synechococcus Bin 28-1     |              |              | 2651870081                        | Northern Gulf of Mexico, 16m                 | 1320301 | 60    | 1624 | Metagenome-assembled Genome |          |
| Uncultured Synechococcus sp. AG-323-A01 | VII          | 5.1B         | 2716884599                        | North Pacific Ocean                          | 186509  | 50    | 242  | SAG                         |          |
| Uncultured Synechococcus sp. AG-323-A11 | VII          | 5.1B         | 2716884600                        | North Pacific Ocean                          | 233099  | 51    | 277  | SAG                         |          |
| Uncultured Synechococcus sp. AG-323-F11 |              |              | 2716884601                        | North Pacific Ocean                          | 226596  | 51    | 223  | SAG                         |          |
| Uncultured Synechococcus sp. AG-323-G20 | I            | 5.1A         | 2716884602                        | North Pacific Ocean                          | 399696  | 44    | 464  | SAG                         |          |
| Uncultured Synechococcus sp. AG-323-Q22 | Not Assigned | Not Assigned | 2716884603                        | North Pacific Ocean                          | 429502  | 46    | 485  | SAG                         |          |
| Uncultured Synechococcus sp. AG-420-M02 | Not Assigned | Not Assigned | 2716884604                        | North Pacific Ocean                          | 890062  | 59    | 1069 | SAG                         |          |
| Uncultured Synechococcus sp. AG-450-D21 |              |              | 2716884605                        | North Pacific Ocean                          | 234750  | 52    | 267  | SAG                         |          |
| Uncultured Synechococcus sp. AG-450-M17 | Not Assigned | Not Assigned | 2716884606                        | North Pacific Ocean                          | 790263  | 56    | 928  | SAG                         |          |
| Uncultured Synechococcus sp. AG-670-A04 | II           | 5.1A         | 2716884607                        | North Pacific Ocean                          | 1188716 | 59    | 1519 | SAG                         |          |
| Uncultured Synechococcus sp. AG-670-A05 | III          | 5.1A         | 2716884608                        | North Pacific Ocean                          | 2005017 | 57    | 2471 | SAG                         |          |
| Uncultured Synechococcus sp. AG-670-A19 | II           | 5.1A         | 2716884609                        | North Pacific Ocean                          | 1348818 | 58    | 1721 | SAG                         |          |
| Uncultured Synechococcus sp. AG-670-B23 | II           | 5.1A         | 2716884610                        | North Pacific Ocean                          | 2266122 | 57    | 2768 | SAG                         |          |
| Uncultured Synechococcus sp. AG-670-D07 | III/XV       | 5.1A         | 2716884611                        | North Pacific Ocean                          | 1514310 | 56    | 1748 | SAG                         |          |
| Uncultured Synechococcus sp. AG-670-F04 | III/XV       | 5.1A         | 2716884612                        | North Pacific Ocean                          | 2247766 | 53    | 2494 | SAG                         |          |
| Uncultured Synechococcus sp. AG-670-F22 | VII          | 5.1B         | 2716884613                        | North Pacific Ocean                          | 1971543 | 56    | 2351 | SAG                         |          |
| Uncultured Synechococcus sp. AG-670-G20 | II           | 5.1A         | 2716884614                        | North Pacific Ocean                          | 970395  | 58    | 1206 | SAG                         |          |
| Uncultured Synechococcus sp. AG-673-A03 | VII          | 5.1B         | 2716884615                        | North Pacific Ocean                          | 1867264 | 56    | 2212 | SAG                         |          |
| Uncultured Synechococcus sp. AG-673-A10 | CDR2         | CDR2         | 2716884616                        | North Pacific Ocean                          | 1605296 | 55    | 1883 | SAG                         |          |

|                                               |                 |                 |            |                     |         |    |      |     |
|-----------------------------------------------|-----------------|-----------------|------------|---------------------|---------|----|------|-----|
| Uncultured<br>Synechococcus sp.<br>AG-673-B04 | CDR2            | CDR2            | 2716884666 | North Pacific Ocean | 1402151 | 56 | 1740 | SAG |
| Uncultured<br>Synechococcus sp.<br>AG-673-B08 | CDR2            | CDR2            | 2716884617 | North Pacific Ocean | 1566036 | 55 | 1840 | SAG |
| Uncultured<br>Synechococcus sp.<br>AG-673-D02 | VII             | 5.1B            | 2716884257 | North Pacific Ocean | 2201799 | 56 | 2597 | SAG |
| Uncultured<br>Synechococcus sp.<br>AG-673-F03 | VII             | 5.1B            | 2716884618 | North Pacific Ocean | 2004490 | 56 | 2332 | SAG |
| Uncultured<br>Synechococcus sp.<br>AG-676-A03 | CDR2            | CDR2            | 2716884619 | North Pacific Ocean | 454271  | 57 | 544  | SAG |
| Uncultured<br>Synechococcus sp.<br>AG-676-A21 | VII             | 5.1B            | 2716884667 | North Pacific Ocean | 1887431 | 56 | 2166 | SAG |
| Uncultured<br>Synechococcus sp.<br>AG-676-C06 | VII             | 5.1B            | 2716884620 | North Pacific Ocean | 2044761 | 56 | 2429 | SAG |
| Uncultured<br>Synechococcus sp.<br>AG-676-E04 | Not<br>Assigned | Not<br>Assigned | 2716884258 | North Pacific Ocean | 579549  | 55 | 643  | SAG |
| Uncultured<br>Synechococcus sp.<br>AG-676-E23 | VII             | 5.1B            | 2716884621 | North Pacific Ocean | 1604488 | 56 | 1908 | SAG |
| Uncultured<br>Synechococcus sp.<br>AG-676-F02 | CDR2            | CDR2            | 2716884622 | North Pacific Ocean | 1527331 | 55 | 1842 | SAG |
| Uncultured<br>Synechococcus sp.<br>AG-679-A02 | VII             | 5.1B            | 2716884668 | North Pacific Ocean | 1747571 | 55 | 2120 | SAG |
| Uncultured<br>Synechococcus sp.<br>AG-679-A04 | VII             | 5.1B            | 2716884669 | North Pacific Ocean | 2278993 | 55 | 2710 | SAG |
| Uncultured<br>Synechococcus sp.<br>AG-679-B05 | CDR2            | CDR2            | 2716884670 | North Pacific Ocean | 1875601 | 56 | 2287 | SAG |
| Uncultured<br>Synechococcus sp.<br>AG-679-B21 | CDR2            | CDR2            | 2716884623 | North Pacific Ocean | 1025533 | 55 | 1237 | SAG |
| Uncultured<br>Synechococcus sp.<br>AG-679-C18 | I               | 5.1A            | 2716884671 | North Pacific Ocean | 2626211 | 49 | 2917 | SAG |
| Uncultured<br>Synechococcus sp.<br>AG-679-D13 | CDR2            | CDR2            | 2716884624 | North Pacific Ocean | 2062147 | 56 | 2382 | SAG |
| Uncultured<br>Synechococcus sp.<br>AG-679-E23 | VII             | 5.1B            | 2716884672 | North Pacific Ocean | 1993060 | 56 | 2289 | SAG |
| Uncultured<br>Synechococcus sp.<br>AG-683-A02 | I               | 5.1A            | 2716884625 | North Pacific Ocean | 696769  | 52 | 849  | SAG |
| Uncultured<br>Synechococcus sp.<br>AG-683-A03 | I               | 5.1A            | 2716884626 | North Pacific Ocean | 1541395 | 53 | 1884 | SAG |
| Uncultured<br>Synechococcus sp.<br>AG-683-A22 | IV              | 5.1A            | 2716884627 | North Pacific Ocean | 1031668 | 52 | 1288 | SAG |
| Uncultured<br>Synechococcus sp.<br>AG-683-B03 | IV              | 5.1A            | 2716884673 | North Pacific Ocean | 1109525 | 52 | 1368 | SAG |
| Uncultured<br>Synechococcus sp.<br>AG-683-B21 | IV              | 5.1A            | 2716884674 | North Pacific Ocean | 1434371 | 53 | 1708 | SAG |
| Uncultured<br>Synechococcus sp.<br>AG-683-C23 | IV              | 5.1A            | 2716884628 | North Pacific Ocean | 1914326 | 53 | 2253 | SAG |
| Uncultured<br>Synechococcus sp.<br>AG-683-F20 | VII             | 5.1B            | 2716884629 | North Pacific Ocean | 972807  | 56 | 1154 | SAG |
| Uncultured<br>Synechococcus sp.<br>AG-683-G11 | VII             | 5.1B            | 2716884675 | North Pacific Ocean | 1287575 | 56 | 1544 | SAG |

|                                               |     |      |            |                     |         |    |      |     |
|-----------------------------------------------|-----|------|------------|---------------------|---------|----|------|-----|
| Uncultured<br>Synechococcus sp.<br>AG-686-A03 | I   | 5.1A | 2716884630 | North Pacific Ocean | 1558360 | 53 | 1848 | SAG |
| Uncultured<br>Synechococcus sp.<br>AG-686-A05 | I   | 5.1A | 2716884676 | North Pacific Ocean | 269552  | 55 | 293  | SAG |
| Uncultured<br>Synechococcus sp.<br>AG-686-B21 | IV  | 5.1A | 2716884631 | North Pacific Ocean | 1849691 | 53 | 2197 | SAG |
| Uncultured<br>Synechococcus sp.<br>AG-686-C21 | IV  | 5.1A | 2716884677 | North Pacific Ocean | 1053969 | 53 | 1280 | SAG |
| Uncultured<br>Synechococcus sp.<br>AG-686-C23 | IV  | 5.1A | 2716884678 | North Pacific Ocean | 569328  | 54 | 703  | SAG |
| Uncultured<br>Synechococcus sp.<br>AG-686-D09 | VII | 5.1B | 2716884679 | North Pacific Ocean | 786300  | 51 | 958  | SAG |
| Uncultured<br>Synechococcus sp.<br>AG-686-F08 | I   | 5.1A | 2716884680 | North Pacific Ocean | 1578770 | 52 | 1854 | SAG |

| Ancestors of the (marine) ProSyn lineage | Clade | Sub-clade | Accession number / GI             | Isolation Site                                                     | Assembled Sequence Size (bp) | GC Content (%) | Num Genes | Genome Status | NCBI Taxonomy ID | Comments                                           |
|------------------------------------------|-------|-----------|-----------------------------------|--------------------------------------------------------------------|------------------------------|----------------|-----------|---------------|------------------|----------------------------------------------------|
| Acaryochloris marina MBIC11017           |       |           | NC_009925.1                       | First isolated from extracts of didemnid ascidians                 | 8361599                      | 47.3           | 8488      | complete      | 329726           |                                                    |
| Acaryochloris sp CCMEE 5410              |       |           | NZ_AFEJ00000000.1                 | Surface                                                            | 7875477                      | 47             | 7587      |               | 310037           |                                                    |
| Cyanobium gracile PCC 6307               | I     | 5.2       | (Biosample Acc. No.) SAMN02261330 | Freshwater                                                         | 3342364                      | 69             | 3439      |               | 292564           |                                                    |
| Cyanobium sp. CACIAM 14                  |       |           | (Biosample Acc. No.) SAMN02767986 | Tucuruí Hydroelectric Dam, State of Pará, Brazil                   | 3212489                      | 69             | 3240      |               | 1496688          |                                                    |
| Cyanobium sp. PCC7001                    | I     | 5.2       | ABSE00000000 / 194270186          | Soil, intertidal zone mud, City Island, New York                   | 2834252                      | 69             | 2826      | WGS           | 180281           |                                                    |
| Gloeobacter kilauensis JS1               |       |           | 2558309063                        | epilithic biofilm in a lava cave in Kīlauea Caldera, Hawai'i, USA. | 4724791                      | 61             | 4562      |               | 1183438          |                                                    |
| Gloeobacter violaceus PCC 7421           |       |           | NC_005125 / 37519569              | Calcareous rock in Switzerland                                     | 4659019                      | 62             | 4490      | complete      | 251221           | Lacks thylakoid membranes                          |
| Leptolyngbya boryana dg5                 |       |           | (Biosample Acc. No.) SAMD00019989 | Freshwater                                                         | 6803470                      | 47.013         | 6375      | complete      |                  |                                                    |
| Leptolyngbya boryana IAM M-101           |       |           | (Biosample Acc. No.) SAMD00019988 |                                                                    | 6803470                      | 47.013         | 6376      | complete      |                  | Previously known as Plectonema boryanum UTEX B 485 |
| Leptolyngbya boryana PCC 6306            |       |           | (Biosample Acc. No.) SAMN02261250 | lake near Madison, Wisconsin, USA                                  | 7262450                      | 47             | 6795      | WGS           |                  |                                                    |
| Leptolyngbya ohadii IS1                  |       |           | (Biosample Acc. No.) SAMN07204499 | Biological soil crust, Nitzana, Israel                             | 7902460                      | 52.1           | 6692      | WGS           |                  |                                                    |
| Leptolyngbya sp. 2LT21S03                |       |           | 2509601021                        | Biological soil crust, Nitzana, Israel                             | 7799549                      | 51.42          | 8798      | WGS           |                  |                                                    |
| Leptolyngbya sp. 'hensonii'              |       |           | (Biosample Acc. No.) SAMN06074267 | pinnacle phototroph mat, Florida USA                               | 5940030                      | 52.3           | 5318      | WGS           |                  |                                                    |
| Leptolyngbya sp. BC1307                  |       |           | (Biosample Acc. No.) SAMN07551813 | Microbial mat on Lake Hoare margin, Antarctica                     | 4916580                      | 52.9           |           | WGS           |                  |                                                    |
| Leptolyngbya sp. Heron Island J          |       |           | (Biosample Acc. No.) SAMN02469314 | Heron Island, Australia                                            | 8064170                      | 48             | 7037      | WGS           |                  |                                                    |
| Leptolyngbya sp. JSC-1                   |       |           | (Biosample Acc. No.) SAMN02743038 | Fresh water                                                        | 7866820                      | 50.7           | 6491      | WGS           |                  |                                                    |
| Leptolyngbya sp. KIOST-1                 |       |           | (Biosample Acc. No.) SAMN02953965 | Spirulina culture pond, Ansan, South Korea                         | 6320120                      | 59.4           | 5717      | WGS           |                  |                                                    |



|                                      |                                      |                                                                                                    |         |         |      |          |                                                                 |
|--------------------------------------|--------------------------------------|----------------------------------------------------------------------------------------------------|---------|---------|------|----------|-----------------------------------------------------------------|
| Leptolyngbya sp. NIES-2104           | (Biosample Acc. No.)<br>SAM00020894  | Terrestrial, isolated from crusts of Nostoc commune HK-02 (NIES-2114) at Himeji, Hyogo, Japan      | 6386310 | 47.4    | 6166 | WGS      |                                                                 |
| Leptolyngbya sp. NIES-3755           | (Biosample Acc. No.)<br>SAM00042786  | Terrestrial, isolated from soil at the Toyohashi University of Technology, Toyohashi, Aichi, Japan | 6761660 | 46.6565 | 6603 | complete |                                                                 |
| Leptolyngbya sp. O-77                | (Biosample Acc. No.)<br>SAM00045841  | hot spring at Aso-Kuju National Park, Kumamoto, Japan                                              | 5480260 | 55.9    | 4644 | complete |                                                                 |
| Leptolyngbya sp. PCC 6406            | (Biosample Acc. No.)<br>SAMN02261357 | Fresh water, California, USA                                                                       | 5776960 | 55.2    | 5134 | WGS      |                                                                 |
| Leptolyngbya sp. PCC 7375            | (Biosample Acc. No.)<br>SAMN02256520 | Plankton, Woods Hole region, Massachusetts, USA                                                    | 9422970 | 47.6    | 8176 | WGS      |                                                                 |
| Leptolyngbya sp. PCC 7376            | (Biosample Acc. No.)<br>SAMN02232033 | Crystal Cave (limestone), Bermuda                                                                  | 5125950 | 43.9    | 4578 | complete |                                                                 |
| Leptolyngbya valderiana BDU 20041    | (Biosample Acc. No.)<br>SAMN04508134 | Epiphyte on wood in sea collected at Point Calimere, Bay of Bengal region, Tamil Nadu, India       | 6991350 | 59.8    | 5922 | WGS      |                                                                 |
| Pseudanabaena biceps PCC 7429        | (Biosample Acc. No.)<br>SAMN02261350 | Sphagnum bog, near Kastanienbaum, Vierwaldstattersee, Switzerland                                  | 5476420 | 43.2    | 4699 | WGS      |                                                                 |
| Pseudanabaena sp. 'Roaring Creek'    | (Biosample Acc. No.)<br>SAMN03854406 | Freshwater from Roaring Creek Reservoir, USA                                                       | 5477810 | 43.3    | 4884 | WGS      |                                                                 |
| Pseudanabaena sp. PCC 6802           | (Biosample Acc. No.)<br>SAMN02261339 |                                                                                                    | 5621880 | 47.8    | 5265 | WGS      | Formerly designated Anacystis nidulans Berkeley strain no. 6301 |
| Pseudanabaena sp. PCC 7367           | NC_019701.1                          |                                                                                                    | 4885680 | 46.2126 | 3976 | complete |                                                                 |
| Pseudanabaena sp. SR411              | (Biosample Acc. No.)<br>SAMN06761459 | Water from Susquehanna River, Union County, USA                                                    | 5780030 | 42.2    | 5287 | WGS      |                                                                 |
| Synechococcus elongatus PCC 6301     | 637000307                            | Waller Creek, Austin, Texas, USA                                                                   | 2696255 | 55      | 2585 |          | 269084                                                          |
| Synechococcus elongatus PCC 7942     | (Biosample Acc. No.)<br>SAMN02598254 | Freshwater lake in California                                                                      | 2742269 | 55      | 2719 |          | 1140                                                            |
| Synechococcus elongatus UTEX 2973    | SAMN03278348                         | Waller Creek, Texas, USA                                                                           | 2744630 | 55.4675 | 2745 | complete | 1350461                                                         |
| Synechococcus leopoliensis UTEX 625a | 2517572104                           | Waller Creek, Texas, USA                                                                           | 2690127 | 55.47   | 2723 | complete | 1237671                                                         |
| Synechococcus sp. 1G10               | (Biosample Acc. No.)<br>SAMN07427896 | Argentina: Nahuel Huapia                                                                           | 3340220 | 64.6    | 3496 |          |                                                                 |
| Synechococcus sp. 8F6                | (Biosample Acc. No.)<br>SAMN07427898 | Mexico: Lake Alchichicha                                                                           | 2510700 | 65.8    | 2692 |          |                                                                 |
| Synechococcus sp. BO 8801            | (Biosample Acc. No.)<br>SAMN07427895 | Switzerland: Lake Constance                                                                        | 3271180 | 69.2    | 3270 |          |                                                                 |
| Synechococcus sp. GFB01              | (Biosample Acc. No.)<br>SAMN03736791 | dos Índios Lagoon, Amapá state, Brazil                                                             | 2339810 | 67.8    | 2513 |          |                                                                 |
| Synechococcus sp. JA-2-3Ba(2-13)     | NC_007776 / 86607503                 | Top 2mm of microbial mat samples from Octopus Spring Yellowstone National Park                     | 3046682 | 58      | 2947 | complete | 321332                                                          |
| Synechococcus sp. JA-3-3Ab           | NC_007775 / 86604733                 | Top 2mm of microbial mat samples from Octopus Spring Yellowstone National Park                     | 2932766 | 60.24   | 2900 | complete | 321327                                                          |

|                                    |                                   |                                                                    |         |         |      |          |         |                                                                                                                                               |
|------------------------------------|-----------------------------------|--------------------------------------------------------------------|---------|---------|------|----------|---------|-----------------------------------------------------------------------------------------------------------------------------------------------|
| Synechococcus sp. Lanier           | (Biosample Acc. No.) SAMN05915837 | Lake Lanier metagenome                                             | 1475740 | 51.4    | 1647 |          |         |                                                                                                                                               |
| Synechococcus sp. LL               | (Biosample Acc. No.) SAMN07427899 | Italy: Lake Albano                                                 | 3548880 | 68.4    | 3564 |          |         |                                                                                                                                               |
| Synechococcus sp. MW101C3          | (Biosample Acc. No.) SAMN07427897 | Austria: Lake Mondsee                                              | 3029140 | 66.1    | 2952 |          |         |                                                                                                                                               |
| Synechococcus sp. PCC 6312         | NC_019680 / 427711179             | Fresh water, California, USA., 1963                                | 3720499 | 49      | 3794 | complete | 195253  | Analyzed in: Shih PM et al., Proc Natl Acad Sci U S A. 2013 Jan 15;110(3):1053-1058)                                                          |
| Synechococcus sp. PCC 7003         | (Biosample Acc. No.) SAMN04422302 | isolated from sand at the edge of a clam bed in Greenwich, CT, USA | 3345090 | 49.3031 | 3177 |          |         |                                                                                                                                               |
| Synechococcus sp. PCC 7117         | (Biosample Acc. No.) SAMN04422303 | low-salinity brine pond in Port Hedland, Western Australia         | 3432100 | 49.1233 | 3273 |          |         |                                                                                                                                               |
| Synechococcus sp. PCC 73109        | (Biosample Acc. No.) SAMN04422304 | sea water taken on City Island, NY, USA                            | 3298680 | 49.3382 | 3139 |          |         |                                                                                                                                               |
| Synechococcus sp. PCC 7335         | NZ_ABRV00000000 / 194018188       | Snail shell, intertidal zone, Puerto Penasco, Mexico               | 5973558 | 48      | 5626 | WGS      | 91464   |                                                                                                                                               |
| Synechococcus sp. PCC 7336         | NZ_CM001776 / 482909597           | Sea water, tank, Berkeley, California, USA, 1971                   | 5140668 | 54      | 4768 | complete | 195250  | Deeply branching cyanobacteria according to 16S; not a Synechococcus (Shih PM et al., Proc Natl Acad Sci U S A. 2013 Jan 15;110(3):1053-1058) |
| Synechococcus sp. PCC 7502         | NC_019702 / 428220140             | Sphagnum bog (species of mosses)                                   | 3583735 | 41      | 3669 | complete | 1173263 | Deeply branching cyanobacteria according to 16S; not a Synechococcus (Shih PM et al., Proc Natl Acad Sci U S A. 2013 Jan 15;110(3):1053-1058) |
| Synechococcus sp. PCC 8807         | (Biosample Acc. No.) SAMN04422305 | lagoon near Port Gentil, Gabon                                     | 3304090 | 49.3702 | 3179 |          |         |                                                                                                                                               |
| Synechococcus sp. SynAce01         | NZ_CP018091.1                     | Ace Lake, Vestfold Hills, Antarctica                               | 2750630 | 63.9    | 2849 |          |         |                                                                                                                                               |
| Synechococcus sp. Tous             | (Biosample Acc. No.) SAMN05915836 | Tous New Dam on river Júcar, Valencia, Spain                       | 1791670 | 52.6    | 1989 |          |         |                                                                                                                                               |
| Thermosynechococcus elongatus BP-1 | NC_004113 / 22297544              | Beppu hot spring in Japan                                          | 2593857 | 54      | 2555 | complete | 197221  |                                                                                                                                               |
| Thermosynechococcus sp. NK55       | NC_023033 / 571026788             | Nakabusa hot spring 1500m altitude                                 | 2520064 | 54      | 2497 | complete | 1394889 |                                                                                                                                               |

N/A = Not Available  
WGS = Whole Genome Shotgun – not closed genome  
SAG = Single-cell Amplified Genome

**Table S2.** Abbreviations of selected genes present and absent in AMZ *Prochlorococcus*.

| Gene             | KEGG Orthology term / gene name                                              | KO/COG/PFAM |
|------------------|------------------------------------------------------------------------------|-------------|
| <i>por</i>       | Light dependent protochlorophyllide oxido-reductase                          | K00218      |
| <i>hemF</i>      | Oxygen-dependent coproporphyrinogen-III oxidase                              | K00228      |
| <i>hemG</i>      | Protoporphyrinogen IX dehydrogenase                                          | K00230      |
| <i>acsF1</i>     | Magnesium-protoporphyrin IX monomethyl ester [oxidative] cyclase 1           | K04035      |
| <i>ho1</i>       | Heme oxygenase 1                                                             | K00510      |
| <i>hemN1</i>     | Coproporphyrinogen-III oxidase                                               | K02495      |
| <i>acsF2</i>     | Magnesium-protoporphyrin IX monomethyl ester [oxidative] cyclase 2           | K04035      |
| <i>ho2</i>       | heme oxygenase 2                                                             | K00510      |
| <i>hemN2</i>     | Oxygen-independent coproporphyrinogen-III oxidase                            | K02495      |
| <i>crtL2</i>     | lycopene epsilon cyclase                                                     | K06444      |
| <i>pcCao</i>     | chlorophyllide a oxygenase                                                   | COG4638     |
| <i>bfr</i>       | Bacterioferritin                                                             | K03594      |
| <i>dvr</i>       | Divinyl chlorophyllide a 8-vinyl-reductase                                   | K19073      |
| <i>apcA</i>      | Allophycocyanin alpha chain                                                  | K02092      |
| <i>apcB</i>      | Allophycocyanin beta chain                                                   | K02093      |
| <i>apcC</i>      | Phycobilisome 7.8 kDa linker polypeptide                                     | K02094      |
| <i>apcD</i>      | Allophycocyanin subunit alpha-B                                              | K02095      |
| <i>apcE</i>      | Anchor polypeptide LCM                                                       | K02096      |
| <i>apcF</i>      | Allophycocyanin beta-18 subunit                                              | K02097      |
| <i>cpcA</i>      | C-phycocyanin subunit alpha                                                  | K02284      |
| <i>cpcB</i>      | C-phycocyanin subunit beta                                                   | K02285      |
| <i>cpcC</i>      | Phycobilisome rod linker polypeptide                                         | K02286      |
| <i>cpcD</i>      | allophycocyanin linker domain protein                                        | K02287      |
| <i>cpcE</i>      | Phycocyanobilin lyase subunit alpha                                          | K02288      |
| <i>cpcF</i>      | Phycocyanobilin lyase subunit beta                                           | K02289      |
| <i>cpcG</i>      | Phycobilisome rod-core linker polypeptide                                    | K02290      |
| <i>cpeA/mpeA</i> | C-phycoerythrin class I subunit alpha/C-phycoerythrin class II subunit alpha | K05376      |
| <i>cpeB/mpeB</i> | C-phycoerythrin class I subunit beta/C-phycoerythrin class II subunit beta   | K05377      |
| <i>cpeC</i>      | Phycobilisome linker polypeptide                                             | K05378      |
| <i>cpeD</i>      | Phycoerythrin-associated linker protein                                      | K05379      |
| <i>cpeE</i>      | Phycocyanin-associated rod linker protein                                    | K05380      |
| <i>cpeR</i>      | C-phycoerythrin operon regulator                                             | K05381      |
| <i>cpeS</i>      | Phycoerythrobilin lyase                                                      | K05382      |
| <i>cpeT</i>      | Phycoerythrin linker                                                         | K05383      |
| <i>cpeU/mpeU</i> | PBS lyase                                                                    | K05384      |
| <i>cpeY</i>      | Bilin biosynthesis protein                                                   | K05385      |
| <i>cpeZ</i>      | Bilin biosynthesis protein                                                   | K05386      |
| <i>pcbA</i>      | Divinyl chlorophyll a/b light-harvesting protein PcbA                        | K08918      |
| <i>pcbB</i>      | Divinyl chlorophyll a/b light-harvesting protein PcbB                        | K08919      |
| <i>pcbC</i>      | Divinyl chlorophyll a/b light-harvesting protein PcbC                        | K08925      |
| <i>pcbD</i>      | Divinyl chlorophyll a/b light-harvesting protein PcbD                        | K08921      |
| <i>pcbE</i>      | Divinyl chlorophyll a/b light-harvesting protein PcbE                        | K08922      |
| <i>pcbF</i>      | Divinyl chlorophyll a/b light-harvesting protein PcbF                        | K08923      |
| <i>pcbG</i>      | Divinyl chlorophyll a/b light-harvesting protein PcbG                        | K08924      |

|                      |                                                                                |           |
|----------------------|--------------------------------------------------------------------------------|-----------|
| <i>pcbH</i>          | Divinyl chlorophyll a/b light-harvesting protein PcbH                          | K08925    |
| <i>isiA</i>          | Iron stress-induced chlorophyll-binding protein                                | K08921    |
| <i>kaiA</i>          | Circadian clock protein KaiA                                                   | K08480    |
| <i>kaiB</i>          | Circadian clock protein KaiB                                                   | K08481    |
| <i>kaiC</i>          | Circadian clock protein KaiC                                                   | K08482    |
| <i>cop23</i>         | Circadian oscillating protein COP23                                            | pfam14218 |
| <i>sasA</i>          | Adaptive-response sensory-kinase SasA                                          | K08479    |
| <i>hcp</i>           | Hydroxylamine reductase                                                        | K05601    |
| <i>fnr</i>           | fnr CRP/FNR family transcriptional regulator, anaerobic regulatory protein     | K01420    |
| <i>ytfE, scdA</i>    | regulator of cell morphogenesis and NO signaling                               | K07322    |
| <i>nirA</i>          | Ferredoxin--nitrite reductase                                                  | K00366    |
| <i>narB</i>          | Nitrate reductase                                                              | K00367    |
| <i>narK</i>          | Nitrate/nitrite transporter                                                    | K02575    |
| <i>cynT</i>          | Carbonic anhydrase                                                             | K01673    |
| <i>cynS</i>          | Cyanate hydratase                                                              | K01725    |
| <i>nitT/ABC.SN.S</i> | ABC-type nitrate/sulfonate/bicarbonate transport system, periplasmic component | K02051    |
| <i>nitT/ABC.SN.P</i> | ABC-type nitrate/sulfonate/bicarbonate transport system, permease component    | K02050    |
| <i>nitT/ABC.SN.A</i> | ABC-type nitrate/sulfonate/bicarbonate transport system, ATPase component      | K02049    |
| <i>moaE</i>          | Molybdopterin synthase catalytic subunit                                       | K03635    |
| <i>moaD</i>          | Molybdopterin synthase sulfur carrier subunit                                  | K03636    |
| <i>moaC</i>          | Molybdenum cofactor biosynthesis protein MoaC                                  | K03637    |
| <i>moaB</i>          | Molybdenum cofactor biosynthesis protein B MoaB                                | K03638    |
| <i>moaA</i>          | Molybdenum cofactor biosynthesis protein MoaA                                  | K03639    |
| <i>moeA</i>          | Molybdopterin molybdenumtransferase                                            | K03750    |
| <i>mobA</i>          | Molybdenum cofactor guanylyltransferase                                        | K03752    |
| <i>urtA</i>          | Urea ABC transporter substrate-binding protein                                 | K11959    |
| <i>urtB</i>          | Urea ABC transporter permease subunit UrtB                                     | K11960    |
| <i>urtC</i>          | Urea ABC transport, permease component UrtC                                    | K11961    |
| <i>urtD</i>          | ABC-type high affinity urea uptake system ATPase component                     | K11962    |
| <i>urtE</i>          | Urea transport system ATP-binding protein                                      | K11963    |
| <i>ureC</i>          | Urease subunit alpha                                                           | K01428    |
| <i>ureB</i>          | Urease subunit beta                                                            | K01429    |
| <i>ureA</i>          | Urease subunit gamma                                                           | K01430    |
| <i>ureE</i>          | Urease accessory protein UreE                                                  | K03187    |
| <i>ureF</i>          | Urease accessory protein UreF                                                  | K03188    |
| <i>ureG</i>          | Urease accessory protein UreG                                                  | K03189    |
| <i>ureD</i>          | Urease accessory protein UreD                                                  | K03190    |
| <i>ugpA</i>          | sn-glycerol-3-phosphate transport system permease protein                      | K05814    |
| <i>ugpB</i>          | sn-glycerol-3-phosphate-binding periplasmic protein                            | K05813    |
| <i>ugpC</i>          | sn-glycerol-3-phosphate import ATP-binding protein Ugp                         | K05816    |
| <i>ugpE</i>          | sn-glycerol-3-phosphate transport system permease protein                      | K05815    |
| <i>glpK</i>          | Glycerol kinase                                                                | K00864    |
| <i>glpD</i>          | Glycerol-3-phosphate dehydrogenase                                             | K00111    |
| <i>dld</i>           | Quinone-dependent D-lactate dehydrogenase                                      | K03777    |
| <i>pfor</i>          | Pyruvate:ferredoxin oxidoreductase                                             | K03737    |
| <i>melB</i>          | Na+/galactoside symporter                                                      | K03292    |

*aldA*  
*adh*

Aldehyde dehydrogenase (NAD+)  
Alcohol dehydrogenase

K00128  
K13953

**Table S3.** Presence (+)—Absence (·) of selected genes in individual AMZ *Prochlorococcus* SAGs.

| SAG                                 | IMG        | Clade / | COG4638      | K00111      | K00128      | K00218     | K00228      | K00366      | K00367      | K00510     | K00510     | K00864      | K01420     | K01428      | K01429      | K01430      | K01673      | K02051               |
|-------------------------------------|------------|---------|--------------|-------------|-------------|------------|-------------|-------------|-------------|------------|------------|-------------|------------|-------------|-------------|-------------|-------------|----------------------|
| Name                                | ID         | Gene    | <i>pcCao</i> | <i>glpD</i> | <i>aldA</i> | <i>por</i> | <i>hemF</i> | <i>nirA</i> | <i>narB</i> | <i>ho1</i> | <i>ho2</i> | <i>glpK</i> | <i>fnr</i> | <i>ureC</i> | <i>ureB</i> | <i>ureA</i> | <i>cynT</i> | <i>nitT/ABC.SN.S</i> |
| Prochlorococcus sp. SCGC AC 669 E6  | 2626541501 | AMZ IA  | +            | ·           | +           | +          | ·           | +           | +           | +          | ·          | ·           | +          | +           | +           | +           | ·           | ·                    |
| Prochlorococcus sp. SCGC AC 669 I11 | 2626541503 | AMZ IB  | ·            | +           | +           | ·          | ·           | +           | ·           | +          | +          | +           | ·          | +           | +           | +           | ·           | ·                    |
| Prochlorococcus sp. SCGC AC 669 I15 | 2626541504 | AMZ IA  | +            | ·           | ·           | ·          | +           | +           | +           | +          | ·          | ·           | ·          | +           | +           | +           | ·           | ·                    |
| Prochlorococcus sp. SCGC AC 669 I23 | 2626541505 | AMZ IB  | ·            | +           | +           | +          | ·           | +           | +           | +          | ·          | +           | +          | ·           | ·           | ·           | ·           | ·                    |
| Prochlorococcus sp. SCGC AC 669 I4  | 2626541506 | AMZ IB  | ·            | ·           | +           | ·          | ·           | ·           | ·           | +          | ·          | ·           | ·          | +           | ·           | ·           | ·           | ·                    |
| Prochlorococcus sp. SCGC AC 669 I9  | 2626541507 | AMZ IB  | ·            | +           | +           | +          | ·           | +           | ·           | +          | +          | +           | +          | +           | +           | +           | ·           | ·                    |
| Prochlorococcus sp. SCGC AC 669 J11 | 2626541509 | AMZ IB  | ·            | +           | +           | +          | +           | ·           | +           | +          | +          | +           | +          | +           | +           | +           | ·           | ·                    |
| Prochlorococcus sp. SCGC AC 669 J17 | 2626541510 | AMZ IB  | ·            | +           | +           | +          | ·           | +           | ·           | +          | ·          | +           | ·          | ·           | ·           | ·           | ·           | ·                    |
| Prochlorococcus sp. SCGC AC 669 J2  | 2626541513 | AMZ IB  | ·            | ·           | ·           | +          | ·           | ·           | ·           | ·          | ·          | ·           | +          | +           | ·           | ·           | ·           | ·                    |
| Prochlorococcus sp. SCGC AC 669 J20 | 2626541511 | AMZ IB  | ·            | +           | +           | ·          | ·           | +           | +           | +          | +          | +           | ·          | +           | +           | ·           | ·           | ·                    |
| Prochlorococcus sp. SCGC AC 669 J22 | 2626541512 | AMZ IB  | ·            | +           | +           | +          | ·           | +           | ·           | +          | ·          | +           | +          | ·           | ·           | ·           | ·           | ·                    |
| Prochlorococcus sp. SCGC AC 669 J5  | 2626541514 | AMZ IB  | ·            | +           | +           | +          | ·           | ·           | ·           | ·          | ·          | +           | +          | ·           | ·           | ·           | ·           | ·                    |
| Prochlorococcus sp. SCGC AC 669 K10 | 2626541515 | AMZ IB  | ·            | ·           | +           | +          | ·           | +           | ·           | +          | +          | ·           | +          | +           | ·           | ·           | ·           | ·                    |
| Prochlorococcus sp. SCGC AC 669 K18 | 2626541516 | AMZ IA  | ·            | ·           | +           | +          | ·           | +           | +           | +          | +          | ·           | +          | +           | +           | +           | ·           | ·                    |
| Prochlorococcus sp. SCGC AC 669 K20 | 2626541517 | AMZ IB  | ·            | ·           | +           | +          | +           | +           | ·           | ·          | ·          | ·           | +          | +           | +           | +           | ·           | ·                    |
| Prochlorococcus sp. SCGC AC 669 K21 | 2626541518 | AMZ IB  | ·            | +           | +           | +          | ·           | +           | +           | +          | +          | +           | +          | +           | +           | +           | ·           | ·                    |
| Prochlorococcus sp. SCGC AC 669 K22 | 2626541519 | AMZ IB  | ·            | ·           | ·           | ·          | ·           | ·           | ·           | ·          | ·          | ·           | ·          | +           | +           | ·           | ·           | ·                    |
| Prochlorococcus sp. SCGC AC 669 L2  | 2626541520 | AMZ IA  | ·            | ·           | +           | +          | ·           | +           | +           | ·          | ·          | ·           | ·          | +           | +           | +           | ·           | ·                    |
| Prochlorococcus sp. SCGC AC 669 M10 | 2626541521 | AMZ IB  | ·            | ·           | ·           | +          | +           | ·           | ·           | +          | ·          | ·           | +          | ·           | ·           | ·           | ·           | ·                    |
| Prochlorococcus sp. SCGC AC 669 M13 | 2626541522 | AMZ IA  | +            | ·           | ·           | +          | ·           | +           | ·           | ·          | ·          | ·           | ·          | +           | ·           | ·           | ·           | ·                    |
| Prochlorococcus sp. SCGC AC 669 M16 | 2626541523 | AMZ IB  | ·            | ·           | ·           | +          | +           | +           | ·           | +          | ·          | ·           | +          | +           | +           | +           | ·           | ·                    |
| Prochlorococcus sp. SCGC AC 669 M19 | 2626541524 | AMZ IA  | ·            | ·           | +           | +          | ·           | +           | ·           | +          | ·          | ·           | ·          | ·           | ·           | ·           | ·           | ·                    |
| Prochlorococcus sp. SCGC AC 669 M6  | 2626541525 | AMZ IA  | ·            | ·           | +           | +          | +           | ·           | ·           | ·          | ·          | ·           | +          | ·           | ·           | ·           | ·           | ·                    |
| Prochlorococcus sp. SCGC AC 669 M7  | 2626541526 | AMZ IA  | ·            | ·           | ·           | +          | ·           | +           | ·           | ·          | ·          | ·           | +          | +           | +           | +           | ·           | ·                    |
| Prochlorococcus sp. SCGC AC 669 N11 | 2626541527 | AMZ IA  | ·            | ·           | +           | ·          | ·           | +           | +           | +          | +          | ·           | ·          | +           | +           | +           | ·           | ·                    |
| Prochlorococcus sp. SCGC AC 669 N18 | 2626541528 | AMZ IB  | ·            | ·           | ·           | +          | +           | +           | +           | +          | ·          | ·           | +          | +           | +           | +           | ·           | ·                    |
| Prochlorococcus sp. SCGC AC 669 N22 | 2626541529 | AMZ IA  | ·            | ·           | ·           | +          | +           | +           | +           | +          | ·          | ·           | +          | +           | +           | +           | ·           | ·                    |
| Prochlorococcus sp. SCGC AC 669 N23 | 2626541530 | AMZ IB  | ·            | +           | +           | +          | +           | ·           | ·           | +          | ·          | +           | +          | +           | ·           | ·           | ·           | ·                    |
| Prochlorococcus sp. SCGC AC 669 N7  | 2626541531 | AMZ IB  | ·            | +           | +           | +          | ·           | +           | ·           | +          | ·          | +           | ·          | +           | ·           | ·           | ·           | ·                    |
| Prochlorococcus sp. SCGC AC 669 O11 | 2626541532 | AMZ IB  | ·            | ·           | ·           | ·          | ·           | +           | ·           | +          | +          | ·           | +          | +           | +           | +           | ·           | ·                    |
| Prochlorococcus sp. SCGC AC 669 O14 | 2626541533 | AMZ IA  | ·            | ·           | +           | +          | +           | ·           | +           | ·          | ·          | ·           | +          | +           | +           | +           | ·           | ·                    |
| Prochlorococcus sp. SCGC AC 669 O17 | 2626541534 | AMZ IB  | ·            | +           | +           | +          | +           | ·           | ·           | +          | ·          | +           | +          | +           | +           | ·           | ·           | ·                    |
| Prochlorococcus sp. SCGC AC 669 P10 | 2626541535 | AMZ IA  | ·            | ·           | +           | ·          | ·           | +           | ·           | +          | ·          | ·           | ·          | ·           | ·           | ·           | ·           | ·                    |
| Prochlorococcus sp. SCGC AC 669 P19 | 2626541536 | AMZ IB  | ·            | ·           | ·           | ·          | +           | +           | ·           | +          | +          | ·           | +          | +           | +           | +           | ·           | ·                    |
| Prochlorococcus sp. SCGC AC 669 P8  | 2626541537 | AMZ IB  | ·            | ·           | +           | +          | ·           | +           | ·           | +          | +          | ·           | +          | +           | +           | +           | ·           | ·                    |
| Prochlorococcus sp. SCGC AD 598 A14 | 2716884926 | AMZ IB  | ·            | ·           | ·           | +          | ·           | +           | +           | ·          | ·          | ·           | ·          | ·           | ·           | ·           | ·           | ·                    |
| Prochlorococcus sp. SCGC AD 598 A20 | 2716884927 | AMZ IB  | ·            | ·           | ·           | ·          | +           | +           | +           | +          | +          | ·           | ·          | +           | +           | +           | ·           | ·                    |



|                                        |            |         |   |   |   |   |   |   |   |   |   |   |   |   |   |   |   |   |   |
|----------------------------------------|------------|---------|---|---|---|---|---|---|---|---|---|---|---|---|---|---|---|---|---|
| Prochlorococcus sp.<br>SCGC AG-937-P16 | 2818991485 | AMZ II  | + | - | - | - | - | - | - | - | - | - | - | - | - | - | - | - | - |
| Prochlorococcus sp.<br>SCGC AG-937-A04 | 2818991575 | AMZ III | + | + | + | + | + | - | - | - | + | + | + | - | - | - | - | - | - |
| Prochlorococcus sp.<br>SCGC AG-937-A22 | 2818991570 | AMZ III | - | - | - | + | - | + | - | + | + | - | + | - | - | - | - | - | - |
| Prochlorococcus sp.<br>SCGC AG-937-B15 | 2818991568 | AMZ III | + | - | - | + | + | + | - | - | - | - | - | - | - | - | - | - | - |
| Prochlorococcus sp.<br>SCGC AG-937-B17 | 2818991567 | AMZ III | + | - | - | + | + | - | - | - | + | + | + | + | + | + | - | - | - |
| Prochlorococcus sp.<br>SCGC AG-937-C02 | 2818991566 | AMZ III | - | - | - | + | - | + | + | - | - | - | - | + | + | + | + | - | - |
| Prochlorococcus sp.<br>SCGC AG-937-C19 | 2818991564 | AMZ III | + | - | - | - | + | - | - | - | - | - | + | - | - | - | - | - | - |
| Prochlorococcus sp.<br>SCGC AG-937-D09 | 2818991559 | AMZ III | + | - | - | + | + | + | + | - | - | - | - | - | - | - | - | + | - |
| Prochlorococcus sp.<br>SCGC AG-937-D11 | 2818991558 | AMZ III | + | - | - | + | + | + | + | - | + | + | + | + | + | + | + | + | - |
| Prochlorococcus sp.<br>SCGC AG-937-D23 | 2818991553 | AMZ III | + | - | - | + | + | + | - | + | - | - | + | - | - | - | - | + | - |
| Prochlorococcus sp.<br>SCGC AG-937-E20 | 2818991549 | AMZ III | + | - | - | - | + | - | + | - | + | + | + | + | + | + | + | - | - |
| Prochlorococcus sp.<br>SCGC AG-937-F14 | 2818991546 | AMZ III | + | - | - | - | + | - | - | + | - | - | - | - | - | - | - | - | - |
| Prochlorococcus sp.<br>SCGC AG-937-F20 | 2818991545 | AMZ III | + | - | - | + | + | - | - | - | - | - | - | - | - | - | - | - | - |
| Prochlorococcus sp.<br>SCGC AG-937-F21 | 2818991544 | AMZ III | + | + | + | + | + | - | - | - | - | + | + | - | - | - | - | - | - |
| Prochlorococcus sp.<br>SCGC AG-937-G08 | 2818991542 | AMZ III | - | - | - | + | - | - | - | + | - | - | - | - | - | - | - | - | - |
| Prochlorococcus sp.<br>SCGC AG-937-G11 | 2818991540 | AMZ III | + | - | - | + | + | - | - | - | + | + | - | - | - | - | - | - | - |
| Prochlorococcus sp.<br>SCGC AG-937-G14 | 2818991539 | AMZ III | + | - | - | - | + | - | + | + | + | + | + | - | - | - | - | - | - |
| Prochlorococcus sp.<br>SCGC AG-937-G19 | 2818991536 | AMZ III | + | - | - | + | - | - | - | - | - | - | - | + | + | + | - | - | - |
| Prochlorococcus sp.<br>SCGC AG-937-G21 | 2818991535 | AMZ III | + | - | - | + | - | - | - | + | - | - | - | - | - | - | - | - | - |
| Prochlorococcus sp.<br>SCGC AG-937-J05 | 2818991528 | AMZ III | + | - | - | + | + | - | - | - | + | + | - | - | - | - | - | - | - |
| Prochlorococcus sp.<br>SCGC AG-937-J08 | 2818991525 | AMZ III | - | - | - | - | - | - | - | + | + | - | - | - | - | - | - | - | - |
| Prochlorococcus sp.<br>SCGC AG-937-J11 | 2818991524 | AMZ III | + | + | + | + | + | - | - | - | + | + | + | - | - | - | - | - | - |
| Prochlorococcus sp.<br>SCGC AG-937-J14 | 2818991523 | AMZ III | - | - | - | - | + | - | - | - | - | - | - | - | - | - | - | - | - |
| Prochlorococcus sp.<br>SCGC AG-937-J17 | 2818991522 | AMZ III | + | + | + | + | + | - | - | + | + | + | + | + | + | + | + | - | - |
| Prochlorococcus sp.<br>SCGC AG-937-K11 | 2818991520 | AMZ III | + | - | - | + | + | - | - | - | + | + | + | - | - | - | - | - | - |
| Prochlorococcus sp.<br>SCGC AG-937-K16 | 2818991519 | AMZ III | + | + | + | + | + | - | - | + | + | + | + | - | - | - | - | - | - |
| Prochlorococcus sp.<br>SCGC AG-937-K23 | 2818991516 | AMZ III | + | - | - | + | + | - | - | + | - | - | + | - | - | - | - | - | - |
| Prochlorococcus sp.<br>SCGC AG-937-L14 | 2818991515 | AMZ III | + | - | - | + | + | - | - | + | + | - | - | + | + | + | - | - | - |
| Prochlorococcus sp.<br>SCGC AG-937-L20 | 2818991514 | AMZ III | + | + | + | - | + | - | - | - | - | + | - | - | - | - | - | - | - |
| Prochlorococcus sp.<br>SCGC AG-937-M02 | 2818991513 | AMZ III | + | - | - | - | + | - | + | - | + | - | + | + | + | + | + | + | - |
| Prochlorococcus sp.<br>SCGC AG-937-M20 | 2818991510 | AMZ III | + | - | - | + | + | - | - | - | + | - | + | - | - | - | - | - | - |
| Prochlorococcus sp.<br>SCGC AG-937-M22 | 2818991509 | AMZ III | - | - | - | - | + | - | - | + | + | - | - | - | - | - | - | - | - |
| Prochlorococcus sp.<br>SCGC AG-937-N04 | 2818991508 | AMZ III | + | + | + | + | - | - | - | + | - | + | + | - | - | - | - | - | - |
| Prochlorococcus sp.<br>SCGC AG-937-N06 | 2818991507 | AMZ III | + | + | + | - | + | - | - | - | + | + | + | - | - | - | - | - | - |
| Prochlorococcus sp.<br>SCGC AG-937-N07 | 2818991506 | AMZ III | + | + | + | + | + | - | - | - | + | + | + | - | - | - | - | - | - |
| Prochlorococcus sp.<br>SCGC AG-937-N14 | 2818991503 | AMZ III | + | - | + | - | + | - | - | + | - | - | - | - | - | - | - | - | - |
| Prochlorococcus sp.<br>SCGC AG-937-N15 | 2818991502 | AMZ III | - | - | - | - | - | + | + | - | - | + | + | + | + | + | + | + | - |
| Prochlorococcus sp.<br>SCGC AG-937-N16 | 2818991501 | AMZ III | + | - | - | + | + | - | - | - | + | - | + | - | - | - | - | - | - |
| Prochlorococcus sp.<br>SCGC AG-937-N19 | 2818991500 | AMZ III | + | - | - | - | + | - | - | + | + | + | + | - | - | - | - | - | - |
| Prochlorococcus sp.<br>SCGC AG-937-O03 | 2818991497 | AMZ III | + | - | - | - | + | - | - | - | + | + | - | - | - | - | - | - | - |
| Prochlorococcus sp.<br>SCGC AG-937-O13 | 2818991493 | AMZ III | + | + | + | - | + | - | - | - | + | + | + | - | - | - | - | - | - |
| Prochlorococcus sp.<br>SCGC AG-937-O22 | 2818991490 | AMZ III | - | + | + | - | - | - | - | + | - | + | - | - | - | - | - | - | - |
| Prochlorococcus sp.<br>SCGC AG-937-P07 | 2818991488 | AMZ III | + | + | + | + | - | - | - | + | + | + | - | - | - | - | - | - | - |



|                                     |            |         |   |   |   |   |   |   |   |   |   |   |   |   |   |   |   |   |
|-------------------------------------|------------|---------|---|---|---|---|---|---|---|---|---|---|---|---|---|---|---|---|
| Prochlorococcus sp. SCGC AG-937-P08 | 2818991487 | AMZ III | + | + | + | + | + | + | + | + | + | + | + | + | + | + | + | + |
| Prochlorococcus sp. SCGC AG-937-P17 | 2818991484 | AMZ III | - | - | - | - | - | - | - | - | - | - | - | - | - | - | - | - |
| Prochlorococcus sp. SCGC AG-937-P18 | 2818991483 | AMZ III | + | + | + | - | + | - | - | - | - | + | - | - | - | - | - | - |
| Prochlorococcus sp. SCGC AG-937-P19 | 2818991482 | AMZ III | + | - | - | + | + | - | - | - | + | - | + | - | - | - | - | - |
| Prochlorococcus sp. SCGC AG-937-P23 | 2818991481 | AMZ III | - | - | - | - | - | - | - | - | - | - | - | - | - | - | - | - |

Table S3. Cont.

| SAG                                 | IMG        | Clade / | K02092      | K02093      | K02094      | K02095      | K02096      | K02097      | K02284      | K02285      | K02288      | K02289      | K02290      | K02495       | K02495       | K02575      | K03187      | K03188      |
|-------------------------------------|------------|---------|-------------|-------------|-------------|-------------|-------------|-------------|-------------|-------------|-------------|-------------|-------------|--------------|--------------|-------------|-------------|-------------|
| Name                                | ID         | Gene    | <i>apcA</i> | <i>apcB</i> | <i>apcC</i> | <i>apcD</i> | <i>apcE</i> | <i>apcF</i> | <i>cpcA</i> | <i>cpcB</i> | <i>cpcE</i> | <i>cpcF</i> | <i>cpcG</i> | <i>hemN2</i> | <i>hemN1</i> | <i>narK</i> | <i>ureE</i> | <i>ureF</i> |
| Prochlorococcus sp. SCGC AC-669 E6  | 2626541501 | AMZ IA  | -           | -           | -           | -           | -           | -           | -           | -           | -           | -           | -           | -            | -            | +           | +           | +           |
| Prochlorococcus sp. SCGC AC-669 I11 | 2626541503 | AMZ IB  | -           | -           | -           | -           | -           | -           | -           | -           | -           | -           | -           | +            | -            | +           | +           | +           |
| Prochlorococcus sp. SCGC AC-669 I15 | 2626541504 | AMZ IA  | -           | -           | -           | -           | -           | -           | -           | -           | -           | -           | -           | -            | -            | +           | +           | +           |
| Prochlorococcus sp. SCGC AC-669 I23 | 2626541505 | AMZ IB  | -           | -           | -           | -           | -           | -           | -           | -           | -           | -           | -           | -            | -            | -           | +           | +           |
| Prochlorococcus sp. SCGC AC-669 I4  | 2626541506 | AMZ IB  | -           | -           | -           | -           | -           | -           | -           | -           | -           | -           | -           | -            | -            | -           | -           | +           |
| Prochlorococcus sp. SCGC AC-669 I9  | 2626541507 | AMZ IB  | -           | -           | -           | -           | -           | -           | -           | -           | -           | -           | -           | +            | +            | +           | +           | +           |
| Prochlorococcus sp. SCGC AC-669 J11 | 2626541509 | AMZ IB  | -           | -           | -           | -           | -           | -           | -           | -           | -           | -           | -           | +            | -            | +           | +           | +           |
| Prochlorococcus sp. SCGC AC-669 J17 | 2626541510 | AMZ IB  | -           | -           | -           | -           | -           | -           | -           | -           | -           | -           | -           | -            | +            | -           | -           | -           |
| Prochlorococcus sp. SCGC AC-669 J2  | 2626541513 | AMZ IB  | -           | -           | -           | -           | -           | -           | -           | -           | -           | -           | -           | -            | -            | -           | -           | -           |
| Prochlorococcus sp. SCGC AC-669 J20 | 2626541511 | AMZ IB  | -           | -           | -           | -           | -           | -           | -           | -           | -           | -           | -           | +            | +            | -           | +           | +           |
| Prochlorococcus sp. SCGC AC-669 J22 | 2626541512 | AMZ IB  | -           | -           | -           | -           | -           | -           | -           | -           | -           | -           | -           | -            | -            | -           | -           | -           |
| Prochlorococcus sp. SCGC AC-669 J5  | 2626541514 | AMZ IB  | -           | -           | -           | -           | -           | -           | -           | -           | -           | -           | -           | -            | -            | -           | -           | -           |
| Prochlorococcus sp. SCGC AC-669 K10 | 2626541515 | AMZ IB  | -           | -           | -           | -           | -           | -           | -           | -           | -           | -           | -           | +            | -            | -           | -           | -           |
| Prochlorococcus sp. SCGC AC-669 K18 | 2626541516 | AMZ IA  | -           | -           | -           | -           | -           | -           | -           | -           | -           | -           | -           | +            | -            | +           | +           | +           |
| Prochlorococcus sp. SCGC AC-669 K20 | 2626541517 | AMZ IB  | -           | -           | -           | -           | -           | -           | -           | -           | -           | -           | -           | -            | -            | +           | +           | +           |
| Prochlorococcus sp. SCGC AC-669 K21 | 2626541518 | AMZ IB  | -           | -           | -           | -           | -           | -           | -           | -           | -           | -           | -           | +            | -            | +           | +           | +           |
| Prochlorococcus sp. SCGC AC-669 K22 | 2626541519 | AMZ IB  | -           | -           | -           | -           | -           | -           | -           | -           | -           | -           | -           | -            | -            | -           | -           | -           |
| Prochlorococcus sp. SCGC AC-669 L2  | 2626541520 | AMZ IA  | -           | -           | -           | -           | -           | -           | -           | -           | -           | -           | -           | -            | -            | +           | +           | +           |
| Prochlorococcus sp. SCGC AC-669 M10 | 2626541521 | AMZ IB  | -           | -           | -           | -           | -           | -           | -           | -           | -           | -           | -           | -            | -            | -           | -           | -           |
| Prochlorococcus sp. SCGC AC-669 M13 | 2626541522 | AMZ IA  | -           | -           | -           | -           | -           | -           | -           | -           | -           | -           | -           | -            | -            | -           | -           | -           |
| Prochlorococcus sp. SCGC AC-669 M16 | 2626541523 | AMZ IB  | -           | -           | -           | -           | -           | -           | -           | -           | -           | -           | -           | -            | -            | -           | +           | +           |
| Prochlorococcus sp. SCGC AC-669 M19 | 2626541524 | AMZ IA  | -           | -           | -           | -           | -           | -           | -           | -           | -           | -           | -           | -            | -            | -           | -           | -           |
| Prochlorococcus sp. SCGC AC-669 M6  | 2626541525 | AMZ IA  | -           | -           | -           | -           | -           | -           | -           | -           | -           | -           | -           | -            | -            | -           | -           | -           |
| Prochlorococcus sp. SCGC AC-669 M7  | 2626541526 | AMZ IA  | -           | -           | -           | -           | -           | -           | -           | -           | -           | -           | -           | -            | +            | +           | +           | +           |
| Prochlorococcus sp. SCGC AC-669 N11 | 2626541527 | AMZ IA  | -           | -           | -           | -           | -           | -           | -           | -           | -           | -           | -           | +            | -            | +           | +           | +           |
| Prochlorococcus sp. SCGC AC-669 N18 | 2626541528 | AMZ IB  | -           | -           | -           | -           | -           | -           | -           | -           | -           | -           | -           | -            | +            | +           | -           | -           |
| Prochlorococcus sp. SCGC AC-669 N22 | 2626541529 | AMZ IA  | -           | -           | -           | -           | -           | -           | -           | -           | -           | -           | -           | -            | -            | +           | +           | +           |
| Prochlorococcus sp. SCGC AC-669 N23 | 2626541530 | AMZ IB  | -           | -           | -           | -           | -           | -           | -           | -           | -           | -           | -           | -            | -            | -           | -           | -           |
| Prochlorococcus sp. SCGC AC-669 N7  | 2626541531 | AMZ IB  | -           | -           | -           | -           | -           | -           | -           | -           | -           | -           | -           | -            | -            | -           | -           | -           |
| Prochlorococcus sp. SCGC AC-669 O11 | 2626541532 | AMZ IB  | -           | -           | -           | -           | -           | -           | -           | -           | -           | -           | -           | +            | +            | +           | +           | +           |
| Prochlorococcus sp. SCGC AC-669 O14 | 2626541533 | AMZ IA  | -           | -           | -           | -           | -           | -           | -           | -           | -           | -           | -           | -            | -            | +           | +           | +           |
| Prochlorococcus sp. SCGC AC-669 O17 | 2626541534 | AMZ IB  | -           | -           | -           | -           | -           | -           | -           | -           | -           | -           | -           | -            | -            | -           | -           | -           |
| Prochlorococcus sp. SCGC AC-669 P10 | 2626541535 | AMZ IA  | -           | -           | -           | -           | -           | -           | -           | -           | -           | -           | -           | -            | +            | -           | -           | -           |
| Prochlorococcus sp. SCGC AC-669 P19 | 2626541536 | AMZ IB  | -           | -           | -           | -           | -           | -           | -           | -           | -           | -           | -           | +            | -            | -           | +           | +           |



|                                     |            |         |   |   |   |   |   |   |   |   |   |   |   |   |   |   |   |   |   |   |   |
|-------------------------------------|------------|---------|---|---|---|---|---|---|---|---|---|---|---|---|---|---|---|---|---|---|---|
| Prochlorococcus sp. SCGC AG-937-O02 | 2818991498 | AMZ II  | . | . | . | . | . | + | . | . | . | . | + | . | . | . | . | . |   |   |   |
| Prochlorococcus sp. SCGC AG-937-O08 | 2818991494 | AMZ II  | . | . | . | + | . | . | . | . | . | . | + | . | . | . | . | . |   |   |   |
| Prochlorococcus sp. SCGC AG-937-P09 | 2818991486 | AMZ II  | + | + | + | + | + | + | . | . | . | . | + | . | . | + | + | + |   |   |   |
| Prochlorococcus sp. SCGC AG-937-P16 | 2818991485 | AMZ II  | . | . | . | . | . | . | . | . | . | . | . | . | . | . | . | . |   |   |   |
| Prochlorococcus sp. SCGC AG-937-A04 | 2818991575 | AMZ III | . | . | . | . | . | . | . | . | . | + | . | + | + | . | . | . |   |   |   |
| Prochlorococcus sp. SCGC AG-937-A22 | 2818991570 | AMZ III | . | . | . | . | . | + | + | + | + | + | + | + | . | . | . | . |   |   |   |
| Prochlorococcus sp. SCGC AG-937-B15 | 2818991568 | AMZ III | . | . | . | . | . | . | . | . | . | + | . | + | . | . | . | . |   |   |   |
| Prochlorococcus sp. SCGC AG-937-B17 | 2818991567 | AMZ III | . | . | . | . | . | . | . | . | . | . | . | + | + | . | . | + | + |   |   |
| Prochlorococcus sp. SCGC AG-937-C02 | 2818991566 | AMZ III | . | . | . | . | . | . | . | . | . | . | . | + | . | . | + | + | + |   |   |
| Prochlorococcus sp. SCGC AG-937-C19 | 2818991564 | AMZ III | . | . | . | . | . | . | . | . | . | . | . | + | + | . | . | . | . |   |   |
| Prochlorococcus sp. SCGC AG-937-D09 | 2818991559 | AMZ III | . | . | . | . | . | . | . | . | . | . | . | . | . | . | . | . | . |   |   |
| Prochlorococcus sp. SCGC AG-937-D11 | 2818991558 | AMZ III | . | . | . | . | + | . | . | . | . | . | . | + | + | . | + | + | + |   |   |
| Prochlorococcus sp. SCGC AG-937-D23 | 2818991553 | AMZ III | . | . | . | . | . | . | . | . | . | . | . | + | . | . | . | . | . |   |   |
| Prochlorococcus sp. SCGC AG-937-E20 | 2818991549 | AMZ III | . | . | . | . | . | . | . | . | . | . | + | . | + | + | . | + | + |   |   |
| Prochlorococcus sp. SCGC AG-937-F14 | 2818991546 | AMZ III | . | . | . | . | . | . | . | . | . | . | . | . | + | . | . | . | . |   |   |
| Prochlorococcus sp. SCGC AG-937-F20 | 2818991545 | AMZ III | + | + | . | . | + | . | . | . | . | . | . | + | . | . | . | . | . |   |   |
| Prochlorococcus sp. SCGC AG-937-F21 | 2818991544 | AMZ III | . | . | . | . | . | . | . | . | . | . | . | + | . | + | . | . | . |   |   |
| Prochlorococcus sp. SCGC AG-937-G08 | 2818991542 | AMZ III | . | . | . | . | . | + | . | . | . | . | . | . | . | . | . | . | . |   |   |
| Prochlorococcus sp. SCGC AG-937-G11 | 2818991540 | AMZ III | . | . | . | . | . | . | . | . | . | . | . | . | . | + | . | . | . |   |   |
| Prochlorococcus sp. SCGC AG-937-G14 | 2818991539 | AMZ III | . | . | . | . | . | . | . | . | . | . | . | . | . | . | . | . | . |   |   |
| Prochlorococcus sp. SCGC AG-937-G19 | 2818991536 | AMZ III | . | . | . | . | . | . | . | . | . | . | . | . | . | . | + | . | + | + |   |
| Prochlorococcus sp. SCGC AG-937-G21 | 2818991535 | AMZ III | . | . | . | . | . | . | . | . | . | . | . | . | . | . | . | . | . | . |   |
| Prochlorococcus sp. SCGC AG-937-J05 | 2818991528 | AMZ III | . | . | . | . | + | . | + | + | + | + | + | + | + | . | . | . | . |   |   |
| Prochlorococcus sp. SCGC AG-937-J08 | 2818991525 | AMZ III | . | . | . | . | . | . | + | + | + | + | + | + | + | . | . | . | . |   |   |
| Prochlorococcus sp. SCGC AG-937-J11 | 2818991524 | AMZ III | + | + | . | . | + | + | + | + | + | + | + | + | + | . | . | . | . |   |   |
| Prochlorococcus sp. SCGC AG-937-J14 | 2818991523 | AMZ III | . | . | . | . | . | . | + | . | . | . | . | + | . | . | . | . | . |   |   |
| Prochlorococcus sp. SCGC AG-937-J17 | 2818991522 | AMZ III | . | . | . | . | . | . | . | . | . | . | . | . | . | + | + | . | + | + |   |
| Prochlorococcus sp. SCGC AG-937-K11 | 2818991520 | AMZ III | . | . | . | . | . | . | . | . | . | . | . | . | . | + | + | . | . | . |   |
| Prochlorococcus sp. SCGC AG-937-K16 | 2818991519 | AMZ III | . | . | . | . | . | . | . | . | . | . | . | . | . | + | + | . | . | . |   |
| Prochlorococcus sp. SCGC AG-937-K23 | 2818991516 | AMZ III | . | . | . | . | . | . | . | . | . | . | . | . | . | . | + | . | . | . |   |
| Prochlorococcus sp. SCGC AG-937-L14 | 2818991515 | AMZ III | . | . | . | . | . | . | . | . | . | . | . | . | . | . | . | . | + | + |   |
| Prochlorococcus sp. SCGC AG-937-L20 | 2818991514 | AMZ III | . | . | . | . | . | . | . | . | . | . | . | . | . | . | . | . | . | . |   |
| Prochlorococcus sp. SCGC AG-937-M02 | 2818991513 | AMZ III | . | . | . | . | + | . | + | . | . | . | . | . | . | + | + | . | + | + |   |
| Prochlorococcus sp. SCGC AG-937-M20 | 2818991510 | AMZ III | + | + | . | . | . | + | . | . | . | . | . | . | . | + | + | + | . | . |   |
| Prochlorococcus sp. SCGC AG-937-M22 | 2818991509 | AMZ III | + | + | . | . | . | + | . | + | + | + | + | + | + | . | . | . | . | . |   |
| Prochlorococcus sp. SCGC AG-937-N04 | 2818991508 | AMZ III | . | . | . | . | . | . | . | . | . | . | . | . | . | . | . | + | . | . |   |
| Prochlorococcus sp. SCGC AG-937-N06 | 2818991507 | AMZ III | . | . | . | . | . | . | . | . | . | . | . | . | . | . | . | . | . | . |   |
| Prochlorococcus sp. SCGC AG-937-N07 | 2818991506 | AMZ III | . | . | . | . | . | . | . | . | . | . | . | . | . | . | . | . | . | . |   |
| Prochlorococcus sp. SCGC AG-937-N14 | 2818991503 | AMZ III | . | . | . | . | . | . | . | . | . | . | . | . | . | . | . | . | . | . |   |
| Prochlorococcus sp. SCGC AG-937-N15 | 2818991502 | AMZ III | . | . | . | . | . | . | . | . | . | . | . | . | . | . | . | . | + | + | + |
| Prochlorococcus sp. SCGC AG-937-N16 | 2818991501 | AMZ III | . | . | . | . | . | . | . | . | . | . | . | . | . | . | . | . | . | . |   |
| Prochlorococcus sp. SCGC AG-937-N19 | 2818991500 | AMZ III | + | + | . | . | . | + | . | . | . | . | . | . | . | + | + | + | . | . |   |
| Prochlorococcus sp. SCGC AG-937-O03 | 2818991497 | AMZ III | . | . | . | . | . | . | . | . | . | . | . | . | . | . | . | . | . | . |   |

|                                     |            |         |   |   |   |   |   |   |   |   |   |   |   |   |   |   |   |
|-------------------------------------|------------|---------|---|---|---|---|---|---|---|---|---|---|---|---|---|---|---|
| Prochlorococcus sp. SCGC AG-937-O13 | 2818991493 | AMZ III | + | + | - | - | + | - | - | - | + | - | + | + | - | - | - |
| Prochlorococcus sp. SCGC AG-937-O22 | 2818991490 | AMZ III | - | - | - | - | - | - | - | - | - | - | - | - | - | - | - |
| Prochlorococcus sp. SCGC AG-937-P07 | 2818991488 | AMZ III | - | - | - | - | - | - | + | + | + | + | + | + | - | - | - |
| Prochlorococcus sp. SCGC AG-937-P08 | 2818991487 | AMZ III | - | - | - | - | - | - | - | - | - | - | + | + | - | + | - |
| Prochlorococcus sp. SCGC AG-937-P17 | 2818991484 | AMZ III | - | - | - | - | - | - | - | - | - | - | + | - | - | - | - |
| Prochlorococcus sp. SCGC AG-937-P18 | 2818991483 | AMZ III | + | + | - | - | + | - | - | - | - | - | - | - | + | - | - |
| Prochlorococcus sp. SCGC AG-937-P19 | 2818991482 | AMZ III | - | - | - | - | + | - | + | + | + | + | + | + | + | - | - |
| Prochlorococcus sp. SCGC AG-937-P23 | 2818991481 | AMZ III | - | - | - | - | - | - | - | - | - | - | - | - | - | - | - |

Table S3. Cont.

| SAG                                 | IMG        | Clade/ | K03189      | K03292      | K03635      | K03636      | K03637      | K03638      | K03639      | K03737      | K03750      | K03752      | K03777     | K04035       | K04035       | K04035        | K05376           |
|-------------------------------------|------------|--------|-------------|-------------|-------------|-------------|-------------|-------------|-------------|-------------|-------------|-------------|------------|--------------|--------------|---------------|------------------|
| Name                                | ID         | Gene   | <i>ureG</i> | <i>melB</i> | <i>moaE</i> | <i>moaD</i> | <i>moaC</i> | <i>moaB</i> | <i>moaA</i> | <i>pfor</i> | <i>moaE</i> | <i>mobA</i> | <i>dld</i> | <i>acsF1</i> | <i>acsF2</i> | <i>acsF2*</i> | <i>cpeA/mpeA</i> |
| Prochlorococcus sp. SCGC AC-669 E6  | 2626541501 | AMZ IA | +           | -           | +           | +           | +           | +           | +           | +           | +           | +           | -          | -            | -            | -             | +                |
| Prochlorococcus sp. SCGC AC-669 I11 | 2626541503 | AMZ IB | +           | -           | +           | +           | -           | +           | +           | +           | +           | +           | -          | +            | -            | -             | +                |
| Prochlorococcus sp. SCGC AC-669 I15 | 2626541504 | AMZ IA | +           | -           | +           | +           | +           | +           | +           | +           | +           | +           | +          | -            | -            | -             | -                |
| Prochlorococcus sp. SCGC AC-669 I23 | 2626541505 | AMZ IB | -           | +           | +           | +           | +           | +           | -           | +           | +           | -           | -          | +            | +            | -             | +                |
| Prochlorococcus sp. SCGC AC-669 I4  | 2626541506 | AMZ IB | +           | -           | -           | -           | -           | -           | -           | +           | -           | -           | -          | +            | -            | -             | +                |
| Prochlorococcus sp. SCGC AC-669 I9  | 2626541507 | AMZ IB | +           | -           | -           | -           | -           | -           | +           | +           | -           | +           | -          | +            | +            | -             | +                |
| Prochlorococcus sp. SCGC AC-669 J11 | 2626541509 | AMZ IB | +           | -           | -           | -           | +           | -           | +           | +           | +           | +           | -          | +            | +            | -             | +                |
| Prochlorococcus sp. SCGC AC-669 J17 | 2626541510 | AMZ IB | -           | +           | -           | -           | -           | -           | -           | +           | -           | -           | -          | +            | +            | -             | +                |
| Prochlorococcus sp. SCGC AC-669 J2  | 2626541513 | AMZ IB | -           | -           | -           | -           | -           | -           | -           | +           | -           | -           | -          | -            | -            | -             | -                |
| Prochlorococcus sp. SCGC AC-669 J20 | 2626541511 | AMZ IB | +           | -           | +           | +           | +           | +           | +           | +           | +           | -           | -          | +            | +            | -             | +                |
| Prochlorococcus sp. SCGC AC-669 J22 | 2626541512 | AMZ IB | -           | +           | -           | -           | -           | -           | -           | -           | -           | -           | -          | -            | -            | -             | +                |
| Prochlorococcus sp. SCGC AC-669 J5  | 2626541514 | AMZ IB | -           | -           | -           | -           | -           | -           | -           | +           | -           | -           | -          | -            | -            | -             | -                |
| Prochlorococcus sp. SCGC AC-669 K10 | 2626541515 | AMZ IB | -           | -           | -           | -           | -           | -           | -           | +           | -           | -           | -          | +            | +            | -             | +                |
| Prochlorococcus sp. SCGC AC-669 K18 | 2626541516 | AMZ IA | +           | -           | +           | +           | +           | +           | +           | -           | +           | +           | -          | +            | +            | -             | +                |
| Prochlorococcus sp. SCGC AC-669 K20 | 2626541517 | AMZ IB | +           | -           | -           | -           | -           | +           | +           | +           | -           | +           | -          | -            | -            | -             | -                |
| Prochlorococcus sp. SCGC AC-669 K21 | 2626541518 | AMZ IB | +           | +           | +           | +           | +           | +           | +           | +           | +           | +           | -          | +            | +            | -             | +                |
| Prochlorococcus sp. SCGC AC-669 K22 | 2626541519 | AMZ IB | -           | -           | -           | -           | -           | -           | -           | +           | -           | -           | -          | -            | -            | -             | -                |
| Prochlorococcus sp. SCGC AC-669 L2  | 2626541520 | AMZ IA | +           | -           | +           | +           | +           | +           | +           | -           | +           | +           | +          | +            | -            | -             | -                |
| Prochlorococcus sp. SCGC AC-669 M10 | 2626541521 | AMZ IB | -           | -           | -           | -           | -           | -           | -           | +           | -           | -           | -          | -            | -            | -             | +                |
| Prochlorococcus sp. SCGC AC-669 M13 | 2626541522 | AMZ IA | -           | -           | +           | +           | -           | +           | -           | +           | +           | -           | +          | -            | -            | -             | -                |
| Prochlorococcus sp. SCGC AC-669 M16 | 2626541523 | AMZ IB | +           | -           | -           | -           | -           | +           | -           | +           | -           | -           | -          | -            | -            | -             | -                |
| Prochlorococcus sp. SCGC AC-669 M19 | 2626541524 | AMZ IA | -           | -           | -           | -           | -           | -           | -           | +           | -           | -           | -          | -            | -            | -             | +                |
| Prochlorococcus sp. SCGC AC-669 M6  | 2626541525 | AMZ IA | -           | -           | -           | -           | -           | -           | -           | +           | -           | -           | +          | +            | -            | -             | +                |
| Prochlorococcus sp. SCGC AC-669 M7  | 2626541526 | AMZ IA | +           | -           | -           | -           | -           | +           | +           | +           | -           | +           | +          | -            | -            | -             | -                |
| Prochlorococcus sp. SCGC AC-669 N11 | 2626541527 | AMZ IA | +           | -           | +           | +           | +           | +           | +           | -           | +           | +           | -          | +            | +            | -             | +                |
| Prochlorococcus sp. SCGC AC-669 N18 | 2626541528 | AMZ IB | -           | -           | +           | +           | +           | +           | +           | -           | +           | +           | -          | -            | -            | -             | +                |
| Prochlorococcus sp. SCGC AC-669 N22 | 2626541529 | AMZ IA | +           | -           | +           | +           | +           | +           | +           | +           | +           | +           | +          | -            | -            | -             | +                |
| Prochlorococcus sp. SCGC AC-669 N23 | 2626541530 | AMZ IB | -           | +           | -           | -           | -           | -           | -           | +           | -           | -           | -          | -            | -            | -             | +                |
| Prochlorococcus sp. SCGC AC-669 N7  | 2626541531 | AMZ IB | -           | -           | -           | -           | -           | -           | -           | +           | -           | -           | -          | -            | -            | -             | -                |
| Prochlorococcus sp. SCGC AC-669 O11 | 2626541532 | AMZ IB | +           | -           | -           | -           | -           | -           | +           | +           | -           | +           | -          | +            | -            | -             | +                |
| Prochlorococcus sp. SCGC AC-669 O14 | 2626541533 | AMZ IA | +           | -           | -           | -           | -           | +           | +           | +           | -           | +           | -          | -            | -            | -             | -                |



|                                     |            |         |   |   |   |   |   |   |   |   |   |   |   |   |   |   |   |
|-------------------------------------|------------|---------|---|---|---|---|---|---|---|---|---|---|---|---|---|---|---|
| Prochlorococcus sp. SCGC AG-937-J20 | 2818991521 | AMZ II  | - | + | - | - | - | - | - | + | - | - | - | - | - | - | - |
| Prochlorococcus sp. SCGC AG-937-M18 | 2818991511 | AMZ II  | + | + | + | + | + | + | + | + | + | + | + | + | + | + | - |
| Prochlorococcus sp. SCGC AG-937-N23 | 2818991499 | AMZ II  | - | - | - | - | - | - | - | - | - | - | - | - | - | - | - |
| Prochlorococcus sp. SCGC AG-937-O02 | 2818991498 | AMZ II  | - | - | - | - | - | - | - | + | - | - | - | - | - | - | - |
| Prochlorococcus sp. SCGC AG-937-O08 | 2818991494 | AMZ II  | - | - | - | - | - | - | - | - | - | - | - | - | - | - | - |
| Prochlorococcus sp. SCGC AG-937-P09 | 2818991486 | AMZ II  | + | - | + | + | + | + | + | + | + | + | + | + | + | - | - |
| Prochlorococcus sp. SCGC AG-937-P16 | 2818991485 | AMZ II  | - | - | - | - | - | - | - | - | - | - | + | - | - | - | - |
| Prochlorococcus sp. SCGC AG-937-A04 | 2818991575 | AMZ III | - | + | - | - | - | - | - | + | - | - | - | + | + | + | + |
| Prochlorococcus sp. SCGC AG-937-A22 | 2818991570 | AMZ III | - | + | - | - | - | + | - | - | - | - | - | + | + | - | + |
| Prochlorococcus sp. SCGC AG-937-B15 | 2818991568 | AMZ III | - | + | + | + | - | + | - | + | + | - | - | + | + | + | + |
| Prochlorococcus sp. SCGC AG-937-B17 | 2818991567 | AMZ III | + | + | - | - | - | - | + | - | - | + | + | + | + | - | - |
| Prochlorococcus sp. SCGC AG-937-C02 | 2818991566 | AMZ III | + | + | + | + | + | + | + | - | + | + | - | - | - | - | - |
| Prochlorococcus sp. SCGC AG-937-C19 | 2818991564 | AMZ III | - | - | - | - | - | - | - | + | - | - | - | + | + | + | - |
| Prochlorococcus sp. SCGC AG-937-D09 | 2818991559 | AMZ III | - | - | + | + | + | + | - | + | + | - | + | + | + | - | - |
| Prochlorococcus sp. SCGC AG-937-D11 | 2818991558 | AMZ III | + | + | + | + | + | + | + | + | + | + | + | + | + | + | - |
| Prochlorococcus sp. SCGC AG-937-D23 | 2818991553 | AMZ III | - | + | + | + | + | + | - | + | + | - | - | + | + | - | - |
| Prochlorococcus sp. SCGC AG-937-E20 | 2818991549 | AMZ III | + | + | - | - | - | - | + | - | - | + | - | + | + | + | - |
| Prochlorococcus sp. SCGC AG-937-F14 | 2818991546 | AMZ III | - | - | - | - | - | - | - | + | - | - | - | + | + | - | + |
| Prochlorococcus sp. SCGC AG-937-F20 | 2818991545 | AMZ III | - | + | - | - | - | - | - | - | - | - | - | + | + | - | - |
| Prochlorococcus sp. SCGC AG-937-F21 | 2818991544 | AMZ III | - | + | - | - | - | - | - | - | - | - | - | + | + | - | - |
| Prochlorococcus sp. SCGC AG-937-G08 | 2818991542 | AMZ III | - | - | - | - | - | - | - | - | - | - | - | - | - | - | - |
| Prochlorococcus sp. SCGC AG-937-G11 | 2818991540 | AMZ III | - | - | - | - | - | - | - | - | - | - | + | + | + | - | - |
| Prochlorococcus sp. SCGC AG-937-G14 | 2818991539 | AMZ III | - | - | - | - | - | - | - | + | - | - | + | + | + | + | - |
| Prochlorococcus sp. SCGC AG-937-G19 | 2818991536 | AMZ III | + | - | - | - | - | - | - | - | - | + | - | - | - | - | - |
| Prochlorococcus sp. SCGC AG-937-G21 | 2818991535 | AMZ III | - | - | - | - | - | - | - | - | - | - | + | + | + | - | - |
| Prochlorococcus sp. SCGC AG-937-J05 | 2818991528 | AMZ III | - | + | - | - | - | - | - | - | - | - | + | + | + | + | + |
| Prochlorococcus sp. SCGC AG-937-J08 | 2818991525 | AMZ III | - | - | - | - | - | - | - | - | - | - | - | + | + | - | + |
| Prochlorococcus sp. SCGC AG-937-J11 | 2818991524 | AMZ III | - | + | - | - | - | - | - | + | - | - | - | + | + | + | + |
| Prochlorococcus sp. SCGC AG-937-J14 | 2818991523 | AMZ III | - | - | - | - | - | - | - | - | - | - | - | - | - | - | - |
| Prochlorococcus sp. SCGC AG-937-J17 | 2818991522 | AMZ III | + | + | - | - | - | - | - | + | - | + | + | + | + | - | - |
| Prochlorococcus sp. SCGC AG-937-K11 | 2818991520 | AMZ III | - | + | - | - | - | - | - | + | - | - | - | + | + | + | + |
| Prochlorococcus sp. SCGC AG-937-K16 | 2818991519 | AMZ III | - | + | - | - | - | - | - | + | - | - | + | + | + | + | - |
| Prochlorococcus sp. SCGC AG-937-K23 | 2818991516 | AMZ III | - | - | - | - | - | - | - | - | - | - | - | - | - | - | + |
| Prochlorococcus sp. SCGC AG-937-L14 | 2818991515 | AMZ III | + | + | - | - | - | - | + | + | - | + | + | + | + | + | - |
| Prochlorococcus sp. SCGC AG-937-L20 | 2818991514 | AMZ III | - | + | - | - | - | - | - | + | - | - | - | + | + | - | + |
| Prochlorococcus sp. SCGC AG-937-M02 | 2818991513 | AMZ III | + | + | - | - | + | - | + | - | - | + | - | + | + | + | - |
| Prochlorococcus sp. SCGC AG-937-M20 | 2818991510 | AMZ III | - | + | - | - | - | - | - | - | - | - | - | + | + | - | - |
| Prochlorococcus sp. SCGC AG-937-M22 | 2818991509 | AMZ III | - | - | - | - | - | - | - | + | - | - | - | + | + | - | + |
| Prochlorococcus sp. SCGC AG-937-N04 | 2818991508 | AMZ III | - | - | - | - | - | - | - | - | - | - | + | - | - | - | - |
| Prochlorococcus sp. SCGC AG-937-N06 | 2818991507 | AMZ III | - | - | - | - | - | - | - | + | - | - | - | + | + | + | + |
| Prochlorococcus sp. SCGC AG-937-N07 | 2818991506 | AMZ III | - | + | - | - | - | - | - | + | - | - | + | + | + | + | - |
| Prochlorococcus sp. SCGC AG-937-N14 | 2818991503 | AMZ III | - | - | - | - | - | - | - | + | - | - | + | + | + | - | - |
| Prochlorococcus sp. SCGC AG-937-N15 | 2818991502 | AMZ III | + | + | + | + | + | + | + | + | + | + | + | + | + | - | - |

|                                     |            |         |   |   |   |   |   |   |   |   |   |   |   |   |   |   |   |
|-------------------------------------|------------|---------|---|---|---|---|---|---|---|---|---|---|---|---|---|---|---|
| Prochlorococcus sp. SCGC AG-937-N16 | 2818991501 | AMZ III | - | + | - | - | - | - | - | - | - | - | - | + | + | - | - |
| Prochlorococcus sp. SCGC AG-937-N19 | 2818991500 | AMZ III | - | + | - | - | - | - | - | + | - | - | + | + | + | + | - |
| Prochlorococcus sp. SCGC AG-937-O03 | 2818991497 | AMZ III | - | - | - | - | - | - | - | - | - | - | - | + | + | - | - |
| Prochlorococcus sp. SCGC AG-937-O13 | 2818991493 | AMZ III | - | - | - | - | - | - | - | + | - | - | + | + | + | + | - |
| Prochlorococcus sp. SCGC AG-937-O22 | 2818991490 | AMZ III | - | - | - | - | - | - | - | + | - | - | - | - | - | - | - |
| Prochlorococcus sp. SCGC AG-937-P07 | 2818991488 | AMZ III | - | - | - | - | - | - | - | - | - | - | + | + | + | - | + |
| Prochlorococcus sp. SCGC AG-937-P08 | 2818991487 | AMZ III | - | + | + | + | + | + | + | + | + | + | + | + | + | + | - |
| Prochlorococcus sp. SCGC AG-937-P17 | 2818991484 | AMZ III | - | - | - | - | - | - | - | + | - | - | - | - | - | - | - |
| Prochlorococcus sp. SCGC AG-937-P18 | 2818991483 | AMZ III | - | + | - | - | - | - | - | - | - | - | + | - | - | - | + |
| Prochlorococcus sp. SCGC AG-937-P19 | 2818991482 | AMZ III | - | + | - | - | - | - | - | + | - | - | + | + | + | + | - |
| Prochlorococcus sp. SCGC AG-937-P23 | 2818991481 | AMZ III | - | - | - | - | - | - | - | - | - | - | - | - | - | - | - |

\* A second copy of *acsF<sub>2</sub>* was found.

Table S3. Cont.

| Genome name                         | IMG ID     | Clade/Fx Gene | K05377<br><i>cpeB/mpeB</i> | K05378<br><i>cpeC</i> | K05379<br><i>cpeD</i> | K05381<br><i>cpeR</i> | K05382<br><i>cpeS</i> | K05383<br><i>cpeT</i> | K05384<br><i>cpeU/mpeU</i> | K05385<br><i>cpeY</i> | K05386<br><i>cpeZ</i> | K05601<br><i>hcp</i> | K06444<br><i>crtL2</i> | K07322<br><i>yfE, scdA</i> | K08479<br><i>sasA</i> | K08480<br><i>kaiA</i> | K08481<br><i>kaiB</i> | K08482<br><i>kaiC</i> |
|-------------------------------------|------------|---------------|----------------------------|-----------------------|-----------------------|-----------------------|-----------------------|-----------------------|----------------------------|-----------------------|-----------------------|----------------------|------------------------|----------------------------|-----------------------|-----------------------|-----------------------|-----------------------|
| Prochlorococcus sp. SCGC AC-669 E6  | 2626541501 | AMZ IA        | +                          | -                     | -                     | -                     | +                     | +                     | +                          | +                     | +                     | -                    | -                      | -                          | -                     | -                     | -                     | -                     |
| Prochlorococcus sp. SCGC AC-669 I11 | 2626541503 | AMZ IB        | +                          | -                     | -                     | -                     | +                     | +                     | +                          | +                     | +                     | -                    | -                      | -                          | -                     | -                     | -                     | -                     |
| Prochlorococcus sp. SCGC AC-669 I15 | 2626541504 | AMZ IA        | -                          | -                     | -                     | -                     | +                     | +                     | -                          | +                     | -                     | -                    | -                      | -                          | +                     | -                     | -                     | -                     |
| Prochlorococcus sp. SCGC AC-669 I23 | 2626541505 | AMZ IB        | +                          | -                     | -                     | -                     | +                     | +                     | +                          | +                     | +                     | +                    | +                      | +                          | -                     | -                     | +                     | +                     |
| Prochlorococcus sp. SCGC AC-669 I4  | 2626541506 | AMZ IB        | +                          | -                     | -                     | -                     | +                     | +                     | -                          | -                     | -                     | -                    | -                      | -                          | -                     | -                     | -                     | -                     |
| Prochlorococcus sp. SCGC AC-669 I9  | 2626541507 | AMZ IB        | +                          | -                     | -                     | -                     | +                     | +                     | +                          | +                     | +                     | +                    | +                      | +                          | +                     | -                     | -                     | -                     |
| Prochlorococcus sp. SCGC AC-669 J11 | 2626541509 | AMZ IB        | +                          | -                     | -                     | -                     | +                     | +                     | +                          | +                     | +                     | +                    | +                      | +                          | -                     | -                     | -                     | -                     |
| Prochlorococcus sp. SCGC AC-669 J17 | 2626541510 | AMZ IB        | +                          | -                     | -                     | -                     | +                     | +                     | +                          | +                     | +                     | -                    | -                      | -                          | +                     | -                     | -                     | -                     |
| Prochlorococcus sp. SCGC AC-669 J2  | 2626541513 | AMZ IB        | -                          | -                     | -                     | -                     | -                     | -                     | -                          | -                     | -                     | -                    | -                      | -                          | -                     | -                     | -                     | -                     |
| Prochlorococcus sp. SCGC AC-669 J20 | 2626541511 | AMZ IB        | +                          | -                     | -                     | -                     | +                     | +                     | +                          | +                     | +                     | -                    | -                      | -                          | -                     | -                     | -                     | -                     |
| Prochlorococcus sp. SCGC AC-669 J22 | 2626541512 | AMZ IB        | +                          | -                     | -                     | -                     | +                     | +                     | +                          | +                     | +                     | +                    | +                      | +                          | +                     | -                     | +                     | +                     |
| Prochlorococcus sp. SCGC AC-669 J5  | 2626541514 | AMZ IB        | -                          | -                     | -                     | -                     | -                     | -                     | -                          | -                     | -                     | +                    | +                      | +                          | +                     | -                     | -                     | -                     |
| Prochlorococcus sp. SCGC AC-669 K10 | 2626541515 | AMZ IB        | +                          | -                     | -                     | -                     | +                     | +                     | +                          | +                     | +                     | +                    | +                      | +                          | -                     | -                     | +                     | +                     |
| Prochlorococcus sp. SCGC AC-669 K18 | 2626541516 | AMZ IA        | +                          | -                     | -                     | -                     | +                     | +                     | +                          | +                     | +                     | +                    | +                      | +                          | -                     | -                     | -                     | -                     |
| Prochlorococcus sp. SCGC AC-669 K20 | 2626541517 | AMZ IB        | -                          | -                     | -                     | -                     | -                     | -                     | -                          | -                     | -                     | +                    | +                      | +                          | +                     | -                     | +                     | +                     |
| Prochlorococcus sp. SCGC AC-669 K21 | 2626541518 | AMZ IB        | +                          | -                     | -                     | -                     | +                     | +                     | +                          | +                     | +                     | +                    | +                      | +                          | -                     | -                     | +                     | +                     |
| Prochlorococcus sp. SCGC AC-669 K22 | 2626541519 | AMZ IB        | -                          | -                     | -                     | -                     | -                     | -                     | -                          | -                     | -                     | -                    | -                      | -                          | +                     | -                     | -                     | -                     |
| Prochlorococcus sp. SCGC AC-669 L2  | 2626541520 | AMZ IA        | -                          | -                     | -                     | -                     | -                     | -                     | -                          | -                     | -                     | +                    | +                      | +                          | -                     | -                     | -                     | -                     |
| Prochlorococcus sp. SCGC AC-669 M10 | 2626541521 | AMZ IB        | -                          | -                     | -                     | -                     | -                     | -                     | +                          | -                     | +                     | -                    | +                      | -                          | +                     | -                     | -                     | -                     |
| Prochlorococcus sp. SCGC AC-669 M13 | 2626541522 | AMZ IA        | -                          | -                     | -                     | -                     | -                     | -                     | -                          | -                     | -                     | +                    | +                      | +                          | -                     | -                     | +                     | +                     |
| Prochlorococcus sp. SCGC AC-669 M16 | 2626541523 | AMZ IB        | -                          | -                     | -                     | -                     | -                     | -                     | -                          | -                     | -                     | +                    | +                      | +                          | -                     | -                     | -                     | -                     |
| Prochlorococcus sp. SCGC AC-669 M19 | 2626541524 | AMZ IA        | +                          | -                     | -                     | -                     | +                     | +                     | +                          | +                     | +                     | -                    | +                      | -                          | -                     | -                     | -                     | -                     |
| Prochlorococcus sp. SCGC AC-669 M6  | 2626541525 | AMZ IA        | +                          | -                     | -                     | -                     | +                     | +                     | +                          | +                     | +                     | +                    | +                      | +                          | +                     | -                     | -                     | -                     |
| Prochlorococcus sp. SCGC AC-669 M7  | 2626541526 | AMZ IA        | -                          | -                     | -                     | -                     | -                     | -                     | -                          | -                     | -                     | -                    | +                      | -                          | -                     | -                     | +                     | +                     |
| Prochlorococcus sp. SCGC AC-669 N11 | 2626541527 | AMZ IA        | +                          | -                     | -                     | -                     | +                     | +                     | +                          | +                     | +                     | -                    | +                      | -                          | -                     | -                     | -                     | -                     |
| Prochlorococcus sp. SCGC AC-669 N18 | 2626541528 | AMZ IB        | +                          | -                     | -                     | -                     | +                     | +                     | +                          | +                     | +                     | -                    | +                      | -                          | -                     | -                     | -                     | -                     |

|                                     |            |        |   |   |   |   |   |   |   |   |   |   |   |   |   |   |   |
|-------------------------------------|------------|--------|---|---|---|---|---|---|---|---|---|---|---|---|---|---|---|
| Prochlorococcus sp. SCGC AC 669 N22 | 2626541529 | AMZ IA | + | - | - | - | - | + | + | + | + | - | + | - | - | - | - |
| Prochlorococcus sp. SCGC AC 669 N23 | 2626541530 | AMZ IB | + | - | - | - | - | - | + | + | + | + | - | + | - | - | - |
| Prochlorococcus sp. SCGC AC 669 N7  | 2626541531 | AMZ IB | - | - | - | - | - | - | - | - | - | - | + | - | + | - | - |
| Prochlorococcus sp. SCGC AC 669 O11 | 2626541532 | AMZ IB | + | - | - | - | + | + | + | + | + | - | + | - | + | - | + |
| Prochlorococcus sp. SCGC AC 669 O14 | 2626541533 | AMZ IA | - | - | - | - | - | - | - | - | - | - | + | - | - | - | - |
| Prochlorococcus sp. SCGC AC 669 O17 | 2626541534 | AMZ IB | + | - | - | - | + | + | + | + | + | - | - | - | - | - | - |
| Prochlorococcus sp. SCGC AC 669 P10 | 2626541535 | AMZ IA | + | - | - | - | + | + | + | + | + | - | - | - | + | - | - |
| Prochlorococcus sp. SCGC AC 669 P19 | 2626541536 | AMZ IB | + | - | - | - | - | - | - | + | - | - | - | - | - | - | + |
| Prochlorococcus sp. SCGC AC 669 P8  | 2626541537 | AMZ IB | + | - | - | - | + | + | + | + | + | - | + | - | - | - | - |
| Prochlorococcus sp. SCGC AD 598 A14 | 2716884926 | AMZ IB | - | - | - | - | - | - | - | - | - | - | - | - | + | - | + |
| Prochlorococcus sp. SCGC AD 598 A20 | 2716884927 | AMZ IB | + | - | - | - | + | + | + | + | + | - | - | - | - | - | - |
| Prochlorococcus sp. SCGC AD 598 B06 | 2718217658 | AMZ IA | - | - | - | - | - | - | - | - | - | + | - | + | - | - | + |
| Prochlorococcus sp. SCGC AD 598 C06 | 2718217657 | AMZ IB | + | - | - | - | + | + | + | + | + | - | - | - | - | - | + |
| Prochlorococcus sp. SCGC AD 598 D04 | 2724679665 | AMZ IB | - | - | - | - | - | - | - | - | - | - | - | - | - | - | - |
| Prochlorococcus sp. SCGC AD 598 D21 | 2724679666 | AMZ IB | - | - | - | - | - | - | - | - | - | - | - | - | - | - | - |
| Prochlorococcus sp. SCGC AD 598 D22 | 2724679668 | AMZ IB | - | - | - | - | - | - | - | - | - | - | - | - | - | - | - |
| Prochlorococcus sp. SCGC AD 598 E21 | 2724679669 | AMZ IA | - | - | - | - | - | - | - | - | - | - | - | - | - | - | - |
| Prochlorococcus sp. SCGC AD 598 F05 | 2724679671 | AMZ IB | + | - | - | - | + | + | + | + | + | - | - | - | - | - | - |
| Prochlorococcus sp. SCGC AD 598 I02 | 2724679674 | AMZ IB | - | - | - | - | - | - | - | - | - | - | - | - | + | - | - |
| Prochlorococcus sp. SCGC AD 598 I13 | 2724679675 | AMZ IA | - | - | - | - | - | - | - | - | - | - | - | - | - | - | - |
| Prochlorococcus sp. SCGC AD 598 K13 | 2724679676 | AMZ IB | - | - | - | - | - | - | - | - | - | - | - | - | - | - | - |
| Prochlorococcus sp. SCGC AD 598 L02 | 2724679678 | AMZ IB | - | - | - | - | - | - | - | - | - | - | - | - | - | - | - |
| Prochlorococcus sp. SCGC AD 598 N22 | 2724679679 | AMZ IB | - | - | - | - | - | - | - | - | - | - | - | - | - | - | - |
| Prochlorococcus sp. SCGC AD 598 P08 | 2724679680 | AMZ IA | - | - | - | - | - | - | - | - | - | - | - | - | - | - | - |
| Prochlorococcus sp. SCGC AD 598 P19 | 2724679681 | AMZ IB | - | - | - | - | - | - | - | - | - | - | - | - | - | - | - |
| Prochlorococcus sp. SCGC AD 858 C19 | 2724679684 | AMZ II | - | - | - | - | - | - | - | - | - | + | - | + | - | - | - |
| Prochlorococcus sp. SCGC AD 858 D07 | 2724679692 | AMZ II | - | + | - | - | - | - | - | - | - | - | - | - | - | - | - |
| Prochlorococcus sp. SCGC AD 858 F19 | 2724679753 | AMZ II | - | + | - | - | - | - | - | - | - | + | - | + | - | - | - |
| Prochlorococcus sp. SCGC AD 858 I04 | 2724679758 | AMZ II | - | + | - | - | - | - | - | - | - | + | - | + | - | - | - |
| Prochlorococcus sp. SCGC AD 858 J10 | 2724679760 | AMZ II | - | - | - | - | - | - | - | - | - | + | - | + | + | - | - |
| Prochlorococcus sp. SCGC AD 858 N09 | 2724679773 | AMZ II | - | - | - | - | - | - | - | - | - | - | - | - | + | - | - |
| Prochlorococcus sp. SCGC AD 858 P02 | 2724679775 | AMZ II | - | - | - | - | - | - | - | - | - | - | - | - | - | - | - |
| Prochlorococcus sp. SCGC AG 937 A15 | 2818991573 | AMZ II | + | + | + | + | + | + | + | + | + | + | + | + | + | + | - |
| Prochlorococcus sp. SCGC AG 937 A16 | 2818991572 | AMZ II | - | - | - | - | - | - | - | - | - | + | - | + | + | + | + |
| Prochlorococcus sp. SCGC AG 937 A21 | 2818991571 | AMZ II | - | - | - | - | - | - | - | - | - | + | + | + | - | - | + |
| Prochlorococcus sp. SCGC AG 937 C04 | 2818991565 | AMZ II | + | + | - | + | + | + | + | + | + | - | + | + | - | + | + |
| Prochlorococcus sp. SCGC AG 937 D03 | 2818991563 | AMZ II | + | - | - | + | + | + | + | + | + | - | - | - | - | - | - |
| Prochlorococcus sp. SCGC AG 937 D07 | 2818991561 | AMZ II | + | + | + | - | + | - | - | - | - | - | - | - | + | + | + |
| Prochlorococcus sp. SCGC AG 937 D14 | 2818991557 | AMZ II | - | + | - | - | - | - | - | - | - | + | + | + | - | - | - |
| Prochlorococcus sp. SCGC AG 937 D18 | 2818991555 | AMZ II | + | + | - | - | - | - | - | - | - | + | + | + | + | - | - |
| Prochlorococcus sp. SCGC AG 937 E05 | 2818991551 | AMZ II | - | - | - | - | - | - | - | - | - | - | + | - | - | - | - |
| Prochlorococcus sp. SCGC AG 937 F06 | 2818991547 | AMZ II | - | + | - | - | - | - | - | - | - | - | + | - | - | - | - |
| Prochlorococcus sp. SCGC AG 937 G10 | 2818991541 | AMZ II | - | - | - | + | + | + | + | + | + | - | - | - | - | - | - |



|                                     |            |         |   |   |   |   |   |   |   |   |   |   |   |   |   |   |   |
|-------------------------------------|------------|---------|---|---|---|---|---|---|---|---|---|---|---|---|---|---|---|
| Prochlorococcus sp. SCGC AG-937-I04 | 2818991533 | AMZ II  | - | + | - | - | - | - | - | - | + | - | + | + | + | + | + |
| Prochlorococcus sp. SCGC AG-937-I23 | 2818991530 | AMZ II  | - | + | - | - | - | - | - | - | + | + | + | + | - | - | - |
| Prochlorococcus sp. SCGC AG-937-J02 | 2818991529 | AMZ II  | + | + | + | + | + | + | + | + | - | - | - | - | - | - | - |
| Prochlorococcus sp. SCGC AG-937-J06 | 2818991527 | AMZ II  | + | + | + | + | + | + | + | + | + | - | + | - | - | - | - |
| Prochlorococcus sp. SCGC AG-937-J07 | 2818991526 | AMZ II  | + | + | + | + | + | + | + | - | + | - | - | - | - | - | - |
| Prochlorococcus sp. SCGC AG-937-J20 | 2818991521 | AMZ II  | - | + | - | - | - | - | - | - | + | - | + | - | + | + | + |
| Prochlorococcus sp. SCGC AG-937-M18 | 2818991511 | AMZ II  | - | + | - | - | - | - | - | - | + | + | + | + | + | + | + |
| Prochlorococcus sp. SCGC AG-937-N23 | 2818991499 | AMZ II  | - | - | - | - | - | - | - | - | - | - | - | - | + | + | + |
| Prochlorococcus sp. SCGC AG-937-O02 | 2818991498 | AMZ II  | - | + | - | - | - | - | - | - | + | - | + | - | - | - | - |
| Prochlorococcus sp. SCGC AG-937-O08 | 2818991494 | AMZ II  | - | + | - | - | - | - | - | - | - | - | - | - | - | - | - |
| Prochlorococcus sp. SCGC AG-937-P09 | 2818991486 | AMZ II  | - | - | - | - | - | - | - | - | + | - | + | - | + | + | + |
| Prochlorococcus sp. SCGC AG-937-P16 | 2818991485 | AMZ II  | - | - | - | - | - | - | - | - | + | + | + | + | + | + | + |
| Prochlorococcus sp. SCGC AG-937-A04 | 2818991575 | AMZ III | + | + | - | - | - | + | + | + | + | + | - | + | - | - | - |
| Prochlorococcus sp. SCGC AG-937-A22 | 2818991570 | AMZ III | + | + | + | + | + | + | + | + | + | - | - | - | + | - | - |
| Prochlorococcus sp. SCGC AG-937-B15 | 2818991568 | AMZ III | + | + | + | - | + | + | + | + | - | + | - | - | + | + | + |
| Prochlorococcus sp. SCGC AG-937-B17 | 2818991567 | AMZ III | - | - | - | - | - | - | - | - | + | - | - | - | - | - | - |
| Prochlorococcus sp. SCGC AG-937-C02 | 2818991566 | AMZ III | - | - | - | - | - | - | - | - | - | - | - | - | - | - | - |
| Prochlorococcus sp. SCGC AG-937-C19 | 2818991564 | AMZ III | - | - | - | - | - | - | - | - | - | - | - | - | + | + | + |
| Prochlorococcus sp. SCGC AG-937-D09 | 2818991559 | AMZ III | - | - | - | - | - | - | - | - | - | - | - | - | + | + | + |
| Prochlorococcus sp. SCGC AG-937-D11 | 2818991558 | AMZ III | - | - | - | - | - | - | - | - | + | - | - | - | - | - | - |
| Prochlorococcus sp. SCGC AG-937-D23 | 2818991553 | AMZ III | - | + | - | - | - | - | - | - | + | + | - | - | - | - | - |
| Prochlorococcus sp. SCGC AG-937-E20 | 2818991549 | AMZ III | - | - | - | - | - | - | - | - | + | - | - | - | - | - | - |
| Prochlorococcus sp. SCGC AG-937-F14 | 2818991546 | AMZ III | + | + | - | - | - | + | + | + | - | + | - | - | - | - | - |
| Prochlorococcus sp. SCGC AG-937-F20 | 2818991545 | AMZ III | - | - | - | - | - | - | - | - | - | - | - | - | - | - | - |
| Prochlorococcus sp. SCGC AG-937-F21 | 2818991544 | AMZ III | - | + | - | - | - | - | - | - | + | + | - | - | - | - | - |
| Prochlorococcus sp. SCGC AG-937-G08 | 2818991542 | AMZ III | - | - | - | - | - | - | - | - | - | - | - | - | - | - | - |
| Prochlorococcus sp. SCGC AG-937-G11 | 2818991540 | AMZ III | - | - | - | - | - | - | - | - | + | + | - | - | - | - | - |
| Prochlorococcus sp. SCGC AG-937-G14 | 2818991539 | AMZ III | - | - | - | - | - | - | - | - | + | + | - | + | - | - | - |
| Prochlorococcus sp. SCGC AG-937-G19 | 2818991536 | AMZ III | - | - | - | - | - | - | - | - | - | + | - | + | + | + | + |
| Prochlorococcus sp. SCGC AG-937-G21 | 2818991535 | AMZ III | - | + | - | - | - | - | - | - | - | + | - | - | - | - | - |
| Prochlorococcus sp. SCGC AG-937-J05 | 2818991528 | AMZ III | + | + | + | + | + | + | + | + | + | - | - | + | - | - | - |
| Prochlorococcus sp. SCGC AG-937-J08 | 2818991525 | AMZ III | + | + | + | - | + | + | + | + | - | - | - | - | - | - | - |
| Prochlorococcus sp. SCGC AG-937-J11 | 2818991524 | AMZ III | + | + | + | + | + | + | + | + | + | - | - | + | + | + | + |
| Prochlorococcus sp. SCGC AG-937-J14 | 2818991523 | AMZ III | - | - | - | - | - | - | - | - | - | - | - | - | - | - | - |
| Prochlorococcus sp. SCGC AG-937-J17 | 2818991522 | AMZ III | - | - | - | - | - | - | - | - | + | - | - | - | + | + | + |
| Prochlorococcus sp. SCGC AG-937-K11 | 2818991520 | AMZ III | + | + | - | + | + | + | + | + | + | - | - | - | - | - | - |
| Prochlorococcus sp. SCGC AG-937-K16 | 2818991519 | AMZ III | - | - | - | - | - | - | - | - | + | - | - | - | - | - | - |
| Prochlorococcus sp. SCGC AG-937-K23 | 2818991516 | AMZ III | + | + | + | + | + | + | + | + | - | + | - | + | - | - | - |
| Prochlorococcus sp. SCGC AG-937-L14 | 2818991515 | AMZ III | - | - | - | - | - | - | - | - | + | - | - | - | - | - | - |
| Prochlorococcus sp. SCGC AG-937-L20 | 2818991514 | AMZ III | + | + | - | - | + | + | + | + | - | + | - | - | - | - | - |
| Prochlorococcus sp. SCGC AG-937-M02 | 2818991513 | AMZ III | - | - | - | - | - | - | - | - | + | - | - | - | - | - | - |
| Prochlorococcus sp. SCGC AG-937-M20 | 2818991510 | AMZ III | - | - | - | - | - | - | - | - | + | - | - | - | - | - | - |
| Prochlorococcus sp. SCGC AG-937-M22 | 2818991509 | AMZ III | + | + | + | + | + | + | + | + | + | - | - | - | - | - | - |

|                                     |            |         |   |   |   |   |   |   |   |   |   |   |   |   |   |   |   |
|-------------------------------------|------------|---------|---|---|---|---|---|---|---|---|---|---|---|---|---|---|---|
| Prochlorococcus sp. SCGC AG-937-N04 | 2818991508 | AMZ III | - | - | - | - | - | - | - | - | - | - | - | - | - | - | - |
| Prochlorococcus sp. SCGC AG-937-N06 | 2818991507 | AMZ III | + | + | + | - | + | + | + | + | + | + | - | - | - | - | - |
| Prochlorococcus sp. SCGC AG-937-N07 | 2818991506 | AMZ III | - | - | - | - | - | - | - | - | - | + | + | - | + | - | - |
| Prochlorococcus sp. SCGC AG-937-N14 | 2818991503 | AMZ III | - | - | - | - | - | - | - | - | - | - | - | - | - | - | - |
| Prochlorococcus sp. SCGC AG-937-N15 | 2818991502 | AMZ III | - | - | - | - | - | - | - | - | - | - | - | + | - | - | - |
| Prochlorococcus sp. SCGC AG-937-N16 | 2818991501 | AMZ III | - | - | - | - | - | - | - | - | - | + | + | - | - | - | - |
| Prochlorococcus sp. SCGC AG-937-N19 | 2818991500 | AMZ III | - | - | - | - | - | - | - | - | - | + | + | - | - | - | - |
| Prochlorococcus sp. SCGC AG-937-O03 | 2818991497 | AMZ III | - | - | - | - | - | - | - | - | - | + | - | - | - | - | - |
| Prochlorococcus sp. SCGC AG-937-O13 | 2818991493 | AMZ III | - | - | - | - | - | - | - | - | - | + | - | - | - | - | - |
| Prochlorococcus sp. SCGC AG-937-O22 | 2818991490 | AMZ III | - | - | - | - | - | - | - | - | - | - | - | - | - | - | - |
| Prochlorococcus sp. SCGC AG-937-P07 | 2818991488 | AMZ III | + | + | + | + | + | + | + | + | + | - | - | - | - | - | - |
| Prochlorococcus sp. SCGC AG-937-P08 | 2818991487 | AMZ III | - | - | - | - | - | - | - | - | - | + | - | - | - | + | + |
| Prochlorococcus sp. SCGC AG-937-P17 | 2818991484 | AMZ III | - | - | - | - | - | - | - | - | - | - | + | - | - | - | - |
| Prochlorococcus sp. SCGC AG-937-P18 | 2818991483 | AMZ III | + | + | - | - | + | + | + | + | + | - | + | - | - | - | - |
| Prochlorococcus sp. SCGC AG-937-P19 | 2818991482 | AMZ III | - | - | - | - | - | - | - | - | - | + | + | - | - | + | + |
| Prochlorococcus sp. SCGC AG-937-P23 | 2818991481 | AMZ III | - | - | - | - | - | - | - | - | - | - | - | - | - | - | - |

Table S3. Cont.

| SAG                                 | IMG        | Clade / | K08918      | K08921      | K08922      | K08923      | K08924      | K08925      | K11959      | K11960      | K11961      | K11962      | K11963      | pfam14218    |
|-------------------------------------|------------|---------|-------------|-------------|-------------|-------------|-------------|-------------|-------------|-------------|-------------|-------------|-------------|--------------|
| Name                                | ID         | Gene    | <i>pcbA</i> | <i>isiA</i> | <i>pcbE</i> | <i>pcbF</i> | <i>pcbG</i> | <i>pcbC</i> | <i>urtA</i> | <i>urtB</i> | <i>urtC</i> | <i>urtD</i> | <i>urtE</i> | <i>cop23</i> |
| Prochlorococcus sp. SCGC AC-669 E6  | 2626541501 | AMZ IA  | -           | -           | -           | -           | +           | -           | +           | +           | +           | +           | +           | -            |
| Prochlorococcus sp. SCGC AC-669 I11 | 2626541503 | AMZ IB  | -           | -           | -           | -           | -           | -           | +           | +           | +           | +           | +           | +            |
| Prochlorococcus sp. SCGC AC-669 I15 | 2626541504 | AMZ IA  | -           | -           | -           | -           | -           | -           | +           | -           | -           | -           | -           | +            |
| Prochlorococcus sp. SCGC AC-669 I23 | 2626541505 | AMZ IB  | -           | -           | -           | -           | +           | -           | +           | -           | -           | -           | -           | -            |
| Prochlorococcus sp. SCGC AC-669 I4  | 2626541506 | AMZ IB  | -           | -           | -           | -           | -           | -           | +           | -           | -           | -           | -           | -            |
| Prochlorococcus sp. SCGC AC-669 I9  | 2626541507 | AMZ IB  | -           | -           | -           | -           | +           | -           | +           | +           | +           | +           | +           | -            |
| Prochlorococcus sp. SCGC AC-669 J11 | 2626541509 | AMZ IB  | -           | -           | -           | -           | +           | -           | +           | +           | +           | +           | +           | -            |
| Prochlorococcus sp. SCGC AC-669 J17 | 2626541510 | AMZ IB  | -           | -           | -           | -           | -           | -           | -           | -           | -           | -           | -           | -            |
| Prochlorococcus sp. SCGC AC-669 J2  | 2626541513 | AMZ IB  | -           | -           | -           | -           | -           | -           | -           | -           | -           | -           | -           | -            |
| Prochlorococcus sp. SCGC AC-669 J20 | 2626541511 | AMZ IB  | -           | -           | -           | -           | -           | -           | +           | +           | -           | -           | -           | -            |
| Prochlorococcus sp. SCGC AC-669 J22 | 2626541512 | AMZ IB  | -           | -           | -           | -           | -           | -           | +           | -           | -           | -           | -           | -            |
| Prochlorococcus sp. SCGC AC-669 J5  | 2626541514 | AMZ IB  | -           | -           | -           | -           | -           | -           | -           | -           | -           | -           | -           | -            |
| Prochlorococcus sp. SCGC AC-669 K10 | 2626541515 | AMZ IB  | -           | -           | -           | -           | -           | -           | +           | -           | -           | -           | -           | -            |
| Prochlorococcus sp. SCGC AC-669 K18 | 2626541516 | AMZ IA  | -           | -           | -           | -           | -           | -           | +           | -           | +           | +           | +           | -            |
| Prochlorococcus sp. SCGC AC-669 K20 | 2626541517 | AMZ IB  | -           | -           | -           | -           | -           | -           | +           | +           | +           | +           | +           | +            |
| Prochlorococcus sp. SCGC AC-669 K21 | 2626541518 | AMZ IB  | -           | -           | -           | -           | +           | -           | +           | +           | +           | +           | +           | -            |
| Prochlorococcus sp. SCGC AC-669 K22 | 2626541519 | AMZ IB  | -           | -           | -           | -           | -           | -           | -           | -           | -           | -           | +           | +            |
| Prochlorococcus sp. SCGC AC-669 L2  | 2626541520 | AMZ IA  | -           | -           | -           | -           | +           | -           | +           | -           | +           | +           | +           | -            |
| Prochlorococcus sp. SCGC AC-669 M10 | 2626541521 | AMZ IB  | -           | -           | -           | -           | +           | -           | -           | -           | -           | -           | -           | -            |
| Prochlorococcus sp. SCGC AC-669 M13 | 2626541522 | AMZ IA  | +           | -           | -           | -           | -           | -           | -           | -           | -           | -           | -           | -            |
| Prochlorococcus sp. SCGC AC-669 M16 | 2626541523 | AMZ IB  | +           | -           | -           | -           | +           | -           | +           | +           | +           | +           | +           | -            |
| Prochlorococcus sp. SCGC AC-669 M19 | 2626541524 | AMZ IA  | +           | -           | -           | -           | -           | -           | -           | -           | -           | -           | -           | -            |

|                                     |            |        |   |   |   |   |   |   |   |   |   |   |   |   |
|-------------------------------------|------------|--------|---|---|---|---|---|---|---|---|---|---|---|---|
| Prochlorococcus sp. SCGC AC 669 M6  | 2626541525 | AMZ IA | + | . | . | . | . | . | . | . | . | . | . | . |
| Prochlorococcus sp. SCGC AC 669 M7  | 2626541526 | AMZ IA | + | . | . | . | + | . | + | + | + | + | + | . |
| Prochlorococcus sp. SCGC AC 669 N11 | 2626541527 | AMZ IA | . | . | . | . | . | . | + | + | + | + | + | . |
| Prochlorococcus sp. SCGC AC 669 N18 | 2626541528 | AMZ IB | + | . | . | . | . | . | . | . | . | . | . | . |
| Prochlorococcus sp. SCGC AC 669 N22 | 2626541529 | AMZ IA | . | . | . | . | . | . | + | . | . | . | . | + |
| Prochlorococcus sp. SCGC AC 669 N23 | 2626541530 | AMZ IB | . | . | . | . | + | . | . | . | . | . | . | . |
| Prochlorococcus sp. SCGC AC 669 N7  | 2626541531 | AMZ IB | + | . | . | . | + | . | . | . | . | . | . | . |
| Prochlorococcus sp. SCGC AC 669 O11 | 2626541532 | AMZ IB | . | . | . | . | + | . | + | + | + | + | + | + |
| Prochlorococcus sp. SCGC AC 669 O14 | 2626541533 | AMZ IA | . | . | . | . | . | . | + | + | + | + | + | . |
| Prochlorococcus sp. SCGC AC 669 O17 | 2626541534 | AMZ IB | . | . | . | . | + | . | . | . | . | . | . | . |
| Prochlorococcus sp. SCGC AC 669 P10 | 2626541535 | AMZ IA | . | . | . | . | + | . | . | . | . | . | . | + |
| Prochlorococcus sp. SCGC AC 669 P19 | 2626541536 | AMZ IB | . | . | . | . | + | . | + | + | + | + | + | . |
| Prochlorococcus sp. SCGC AC 669 P8  | 2626541537 | AMZ IB | . | . | . | . | . | . | + | + | + | + | + | . |
| Prochlorococcus sp. SCGC AD 598 A14 | 2716884926 | AMZ IB | . | . | . | . | . | . | . | . | . | . | . | . |
| Prochlorococcus sp. SCGC AD 598 A20 | 2716884927 | AMZ IB | . | . | . | . | + | . | + | + | . | . | . | + |
| Prochlorococcus sp. SCGC AD 598 B06 | 2718217658 | AMZ IA | . | . | . | . | . | . | . | . | . | . | . | . |
| Prochlorococcus sp. SCGC AD 598 C06 | 2718217657 | AMZ IB | . | . | . | . | . | . | . | . | . | . | . | . |
| Prochlorococcus sp. SCGC AD 598 D04 | 2724679665 | AMZ IB | + | . | . | . | + | . | . | . | . | . | . | . |
| Prochlorococcus sp. SCGC AD 598 D21 | 2724679666 | AMZ IB | . | . | . | . | + | . | . | . | . | . | . | . |
| Prochlorococcus sp. SCGC AD 598 D22 | 2724679668 | AMZ IB | . | . | . | . | . | . | . | . | . | . | . | . |
| Prochlorococcus sp. SCGC AD 598 E21 | 2724679669 | AMZ IA | . | . | . | . | . | . | . | . | . | . | . | . |
| Prochlorococcus sp. SCGC AD 598 F05 | 2724679671 | AMZ IB | . | . | . | . | . | . | . | . | . | . | . | . |
| Prochlorococcus sp. SCGC AD 598 I02 | 2724679674 | AMZ IB | . | . | . | . | + | . | + | . | . | . | . | . |
| Prochlorococcus sp. SCGC AD 598 I13 | 2724679675 | AMZ IA | . | . | . | . | . | . | . | . | . | . | . | . |
| Prochlorococcus sp. SCGC AD 598 K13 | 2724679676 | AMZ IB | . | . | . | . | . | . | . | . | . | . | . | + |
| Prochlorococcus sp. SCGC AD 598 L02 | 2724679678 | AMZ IB | . | . | . | . | . | . | . | . | . | . | . | + |
| Prochlorococcus sp. SCGC AD 598 N22 | 2724679679 | AMZ IB | . | . | . | . | . | . | . | . | . | . | . | . |
| Prochlorococcus sp. SCGC AD 598 P08 | 2724679680 | AMZ IA | . | . | . | . | . | . | . | . | . | . | . | . |
| Prochlorococcus sp. SCGC AD 598 P19 | 2724679681 | AMZ IB | . | . | . | . | . | . | . | . | . | . | . | . |
| Prochlorococcus sp. SCGC AD 858 C19 | 2724679684 | AMZ II | . | + | . | . | . | . | . | . | . | . | . | + |
| Prochlorococcus sp. SCGC AD 858 D07 | 2724679692 | AMZ II | . | . | . | . | . | . | . | . | . | . | . | . |
| Prochlorococcus sp. SCGC AD 858 F19 | 2724679753 | AMZ II | . | + | . | . | . | . | . | . | . | . | . | . |
| Prochlorococcus sp. SCGC AD 858 I04 | 2724679758 | AMZ II | . | + | . | . | . | . | . | . | . | . | . | . |
| Prochlorococcus sp. SCGC AD 858 J10 | 2724679760 | AMZ II | . | . | . | . | . | . | . | . | . | . | . | + |
| Prochlorococcus sp. SCGC AD 858 N09 | 2724679773 | AMZ II | . | . | . | . | . | . | . | . | . | . | . | . |
| Prochlorococcus sp. SCGC AD 858 P02 | 2724679775 | AMZ II | . | . | . | . | . | . | . | . | . | . | . | . |
| Prochlorococcus sp. SCGC AG 937 A15 | 2818991573 | AMZ II | . | . | . | . | . | . | + | . | . | . | . | . |
| Prochlorococcus sp. SCGC AG 937 A16 | 2818991572 | AMZ II | . | + | . | . | . | . | . | . | . | . | . | . |
| Prochlorococcus sp. SCGC AG 937 A21 | 2818991571 | AMZ II | . | . | . | . | . | . | . | . | . | . | . | . |
| Prochlorococcus sp. SCGC AG 937 C04 | 2818991565 | AMZ II | . | . | . | . | . | . | . | . | . | . | . | . |
| Prochlorococcus sp. SCGC AG 937 D03 | 2818991563 | AMZ II | . | . | . | . | . | . | . | . | . | . | . | . |
| Prochlorococcus sp. SCGC AG 937 D07 | 2818991561 | AMZ II | . | . | . | . | . | . | . | . | . | . | . | . |
| Prochlorococcus sp. SCGC AG 937 D14 | 2818991557 | AMZ II | . | + | . | . | . | . | . | . | . | . | . | . |



|                                        |            |         |   |   |   |   |   |   |   |   |   |   |   |   |
|----------------------------------------|------------|---------|---|---|---|---|---|---|---|---|---|---|---|---|
| Prochlorococcus sp.<br>SCGC AG 937-L20 | 2818991514 | AMZ III | . | . | . | . | . | . | . | . | . | . | . | . |
| Prochlorococcus sp.<br>SCGC AG 937-M02 | 2818991513 | AMZ III | . | . | . | . | . | + | + | + | + | + | . | . |
| Prochlorococcus sp.<br>SCGC AG 937-M20 | 2818991510 | AMZ III | . | + | . | . | . | . | . | . | . | . | . | . |
| Prochlorococcus sp.<br>SCGC AG 937-M22 | 2818991509 | AMZ III | . | . | . | . | . | . | . | . | . | . | . | . |
| Prochlorococcus sp.<br>SCGC AG 937-N04 | 2818991508 | AMZ III | . | . | . | . | . | . | . | . | . | . | . | . |
| Prochlorococcus sp.<br>SCGC AG 937-N06 | 2818991507 | AMZ III | . | . | . | . | . | . | . | . | . | . | . | . |
| Prochlorococcus sp.<br>SCGC AG 937-N07 | 2818991506 | AMZ III | . | + | . | . | . | . | . | . | . | . | . | . |
| Prochlorococcus sp.<br>SCGC AG 937-N14 | 2818991503 | AMZ III | . | . | . | . | . | . | . | . | . | . | . | . |
| Prochlorococcus sp.<br>SCGC AG 937-N15 | 2818991502 | AMZ III | . | . | . | . | . | + | . | . | . | . | . | . |
| Prochlorococcus sp.<br>SCGC AG 937-N16 | 2818991501 | AMZ III | . | + | . | . | . | . | . | . | . | . | . | . |
| Prochlorococcus sp.<br>SCGC AG 937-N19 | 2818991500 | AMZ III | . | + | . | . | . | . | . | . | . | . | + | . |
| Prochlorococcus sp.<br>SCGC AG 937-O03 | 2818991497 | AMZ III | . | . | . | . | . | . | . | . | . | . | . | . |
| Prochlorococcus sp.<br>SCGC AG 937-O13 | 2818991493 | AMZ III | . | . | . | . | . | . | . | . | . | . | . | . |
| Prochlorococcus sp.<br>SCGC AG 937-O22 | 2818991490 | AMZ III | . | . | . | . | . | . | . | . | . | + | + | . |
| Prochlorococcus sp.<br>SCGC AG 937-P07 | 2818991488 | AMZ III | . | . | . | . | . | . | . | . | . | . | . | . |
| Prochlorococcus sp.<br>SCGC AG 937-P08 | 2818991487 | AMZ III | . | + | . | . | . | . | . | . | . | . | . | . |
| Prochlorococcus sp.<br>SCGC AG 937-P17 | 2818991484 | AMZ III | . | . | . | . | . | . | . | . | . | . | . | . |
| Prochlorococcus sp.<br>SCGC AG 937-P18 | 2818991483 | AMZ III | . | . | . | . | . | . | . | . | . | . | . | . |
| Prochlorococcus sp.<br>SCGC AG 937-P19 | 2818991482 | AMZ III | . | . | . | . | . | . | . | . | . | . | . | . |
| Prochlorococcus sp.<br>SCGC AG 937-P23 | 2818991481 | AMZ III | . | . | . | . | . | . | . | . | . | . | . | . |

**Table S4.** High-performance liquid chromatography (HPLC) photosynthetic pigments at a selected depth in AMZ waters during cruise MV1015. Data downloaded from the C-MORE BiG-RAPA Database ([https://hahana.soest.hawaii.edu/cmoreserver/cruises/big\\_rapa/](https://hahana.soest.hawaii.edu/cmoreserver/cruises/big_rapa/)).

| Station | Depth (m) | CHLDA (ng/L) | CHLC (ng/L) | PER (ng/L) | BUT (ng/L) | FUCO (ng/L) | HEX (ng/L) | PRAS (ng/L) | VIOLA (ng/L) | DDX (ng/L) | ALLOX (ng/L) | DTX (ng/L) | LUT (ng/L) | ZEAX (ng/L) | CHLB (ng/L) | A-CAR (ng/L) | B-CAR (ng/L) | DV-CHLA (ng/L) | MV-CHLA (ng/L) | TOTCHLA (ng/L) |
|---------|-----------|--------------|-------------|------------|------------|-------------|------------|-------------|--------------|------------|--------------|------------|------------|-------------|-------------|--------------|--------------|----------------|----------------|----------------|
| 1       | 65        | 0.0          | 19.1        | 0.0        | 0.0        | 16.0        | 12.6       | 0.0         | 0.4          | 1.2        | 0.0          | 0.0        | 0.0        | 22.8        | 86.5        | 55.3         | 0.0          | 52.7           | 30.4           | 83.1           |

**Pigment abbreviations:** CHLDA = chlorophyllide *a*, CHLC = chlorophyll *c*, PER = peridinin, BUT = 19'-butanoyloxyfucoxanthin, FUCO = fucoxanthin, HEX = 19'-hexanoyloxyfucoxanthin, PRAS = prasinoxanthin, VIOLA = violaxanthin, DDX = diadinoxanthin, ALLOX = alloxanthin, DTX = diatoxanthin, LUT = lutein, ZEAX = zeaxanthin, CHLB = chlorophyll *b*, A-CAR =  $\alpha$ -carotene, B-CAR =  $\beta$ -carotene, DV-CHLA = divinyl chlorophyll *a*, MV-CHLA = mono-vinyl chlorophyll *a*, TOTCHLA = total chlorophyll *a*.

**Table S5.** Metagenomes and metatranscriptomes used in fragment recruitment (Fig. S7) and metatranscriptomic analysis (Fig. 8).

| Accession    | Data Repository             | Metagenome/Metatranscriptome Name | Specific Ecosystem                 | Region       | Latitude | Longitude | Depth (m) | O <sub>2</sub> (μmol/kg) | NO <sub>2</sub> <sup>-</sup> (μmol/kg) | NO <sub>3</sub> <sup>-</sup> (μmol/kg) | PO <sub>4</sub> <sup>-3</sup> (μmol/kg) | Temp (°C) | Salinity | Seq. Platform      | Total quality filtered reads | Reference / Contact                                                                                                                           |
|--------------|-----------------------------|-----------------------------------|------------------------------------|--------------|----------|-----------|-----------|--------------------------|----------------------------------------|----------------------------------------|-----------------------------------------|-----------|----------|--------------------|------------------------------|-----------------------------------------------------------------------------------------------------------------------------------------------|
| SRX648500    | NCBI SRA                    | OMZoMBIE_2013_St10_30m_D          | Eastern-Tropical North Pacific AMZ | ETNP         | 18.800   | -104.7    | 30        | 205.1                    | 0.00                                   | 0.00                                   | 0.00                                    | 26.22     | 34.68    | Illumi MiSeq       |                              | Ganesh et al. ISME J. 2015 Apr 7. doi: 10.1038/ismej.2015.44.                                                                                 |
| SRX648501    | NCBI SRA                    | OMZoMBIE_2013_St10_85m_D          | Eastern-Tropical North Pacific AMZ | ETNP         | 18.800   | -104.7    | 85        | 3.7                      | 20.86                                  | 0.11                                   | 2.75                                    | 15.5      | 34.65    | Illumi MiSeq       | 1903315                      | Ganesh et al. ISME J. 2015 Apr 7. doi: 10.1038/ismej.2015.44.                                                                                 |
| SRX648502    | NCBI SRA                    | OMZoMBIE_2013_St10_125m_D         | Eastern-Tropical North Pacific AMZ | ETNP         | 18.800   | -104.7    | 125       | 1.4                      | 16.39                                  | 4.75                                   | 2.75                                    | 12.86     | 34.77    | Illumi MiSeq       | 1342105                      | Ganesh et al. ISME J. 2015 Apr 7. doi: 10.1038/ismej.2015.44.                                                                                 |
| SRX648440    | NCBI SRA                    | OMZoMBIE_2013_St6_30m_D           | Eastern-Tropical North Pacific AMZ | ETNP         | 18.900   | -104.5    | 30        | 215.9                    | 3.28                                   | 0.42                                   | 0.98                                    | 25.7      | 34.69    | Illumi MiSeq       |                              | Ganesh et al. ISME J. 2015 Apr 7. doi: 10.1038/ismej.2015.44.                                                                                 |
| SRX648442    | NCBI SRA                    | OMZoMBIE_2013_St6_85m_D           | Eastern-Tropical North Pacific AMZ | ETNP         | 18.900   | -104.5    | 85        | 1.7                      | 22.44                                  | 0.07                                   | 2.57                                    | 14.9      | 34.72    | Illumi MiSeq       | 2305477                      | Ganesh et al. ISME J. 2015 Apr 7. doi: 10.1038/ismej.2015.44.                                                                                 |
| SRX648443    | NCBI SRA                    | OMZoMBIE_2013_St6_100m_D          | Eastern-Tropical North Pacific AMZ | ETNP         | 18.900   | -104.5    | 100       | 1.5                      | 16.25                                  | 4.19                                   | 2.52                                    | 13.99     | 34.78    | Illumi MiSeq       | 1396799                      | Ganesh et al. ISME J. 2015 Apr 7. doi: 10.1038/ismej.2015.44.                                                                                 |
| SRX3036145   | NCBI SRA                    | NH1315-St6-100m                   | Eastern-Tropical North Pacific AMZ | ETNP         | 18.900   | -104.5    | 100       | 1.5                      | 16.25                                  | 4.19                                   | 2.52                                    | 13.99     | 34.78    | Illumi MiSeq       | 5494798                      | Plominsky et al. Environmental microbiology. 2018 Aug;20(8):2727-42.                                                                          |
| SRX648444    | NCBI SRA                    | OMZoMBIE_2013_St6_125m_D          | Eastern-Tropical North Pacific AMZ | ETNP         | 18.900   | -104.5    | 125       | 1.8                      | 15.48                                  | 6.06                                   | 2.55                                    | 13.36     | 34.8     | Illumi MiSeq       |                              | Ganesh et al. ISME J. 2015 Apr 7. doi: 10.1038/ismej.2015.44.                                                                                 |
| SRX3036140   | NCBI SRA                    | Galathea_G14.100_60m              | Eastern-Tropical South Pacific AMZ | ETSP         | -12.444  | -77.616   | 60        | 0.0                      |                                        | 1.00                                   |                                         |           |          | 454-pyrosequencing | 1143183                      | Astorga-Eló et al. ISME J. 2015 May;9(5):1264-7.                                                                                              |
| SRX080938    | NCBI SRA                    | MOOMZ1_65m_D                      | Eastern-Tropical South Pacific AMZ | ETSP         | -20.117  | -70.383   | 65        | 40.0                     | 15.00                                  | 0.00                                   |                                         |           |          | 454-pyrosequencing | 330057                       | Stewart et al. Environ Microbiol. 2012 Jan;14(1):23-40.                                                                                       |
| SRX025908    | NCBI SRA                    | MOOMZ1_85m_D                      | Eastern-Tropical South Pacific AMZ | ETSP         | -20.117  | -70.383   | 85        | 10.0                     | 14.00                                  | 2.00                                   |                                         |           |          | 454-pyrosequencing | 476329                       | Stewart et al. Environ Microbiol. 2012 Jan;14(1):23-40.                                                                                       |
| SRX029170    | NCBI SRA                    | MOOMZ2_70m_D                      | Eastern-Tropical South Pacific AMZ | ETSP         | -20.117  | -70.383   | 70        | 25.0                     |                                        |                                        |                                         |           |          | 454-pyrosequencing | 354902                       | Stewart et al. Environ Microbiol. 2012 Jan;14(1):23-40.                                                                                       |
| SRX080956    | NCBI SRA                    | MOOMZ3_50m_D                      | Eastern-Tropical South Pacific AMZ | ETSP         | -20.117  | -70.383   | 50        | 16.3                     | 16.21                                  | 0.04                                   | 2.84                                    |           | 34.82    | 454-pyrosequencing | 566738                       | Canfield et al. Science. 2010 Dec 3;330(6009):1375-1378.                                                                                      |
| SRX029172    | NCBI SRA                    | MOOMZ3_80m_D                      | Eastern-Tropical South Pacific AMZ | ETSP         | -20.117  | -70.383   | 80        | 0.0                      | 15.21                                  | 4.37                                   | 3.00                                    |           | 34.91    | 454-pyrosequencing | 693522                       | De Brabandere L, Canfield DE, Dalsgaard T, Friederich GE, Revsbech NP, Ulloa O, Thamdrup B (2014) Environ Microbiol. 2014 Oct;16(10):3041-54. |
| SAMEA2619935 | European Nucleotide Archive | TARA_036_SRF_0.1-0.22             | Indian Ocean [MRGID:1904]          | Indian Ocean | 20.818   | 63.505    | 5.5       | 210.9                    | 0.08                                   | 0.05                                   | 0.37                                    | 25.6      | 36.5     | HiSeq-Illumi       | 19877627                     | Sunagawa et al. Science 22 May 2015: Vol. 348, Issue 6373                                                                                     |
| SAMEA2620004 | European Nucleotide Archive | TARA_038_SRF_0.1-0.22             | Indian Ocean [MRGID:1904]          | Indian Ocean | 19.039   | 64.491    | 5.5       | 199.9                    | 0.05                                   | 0.01                                   | 0.32                                    | 26.2      | 36.6     | HiSeq-Illumi       | 29453475                     | Sunagawa et al. Science 22 May 2015: Vol. 348, Issue 6373                                                                                     |
| SAMEA2620081 | European Nucleotide Archive | TARA_039_DCM_0.22-1.6             | Indian Ocean [MRGID:1904]          | Indian Ocean | 18.584   | 66.473    | 25.3      | 193.0                    | 0.07                                   | 0.02                                   | 0.26                                    | 26.8      | 36.3     | HiSeq-Illumi       | 149652886                    | Sunagawa et al. Science 22 May 2015: Vol. 348, Issue 6373                                                                                     |
| SAMEA2620106 | European Nucleotide Archive | TARA_039_MES_0.1-0.22             | Indian Ocean [MRGID:1904]          | Indian Ocean | 18.734   | 66.390    | 268.2     | 2.3                      | 19.15                                  | 2.07                                   | 2.64                                    | 15.6      | 35.9     | HiSeq-Illumi       | 76545865                     | Sunagawa et al. Science 22 May 2015: Vol. 348, Issue 6373                                                                                     |
| SAMEA2620065 | European Nucleotide Archive | TARA_039_SRF_0.1-0.22             | Indian Ocean [MRGID:1904]          | Indian Ocean | 18.592   | 66.622    | 5.4       | 193.4                    | 0.02                                   | 0.01                                   | 0.23                                    | 26.8      | 36.3     | HiSeq-Illumi       | 20449163                     | Sunagawa et al. Science 22 May 2015: Vol. 348, Issue 6373                                                                                     |
| SAMEA2620198 | European Nucleotide Archive | TARA_041_SRF_0.1-0.22             | Indian Ocean [MRGID:1904]          | Indian Ocean | 14.606   | 69.978    | 5.5       | 187.4                    | 0.09                                   | 0.00                                   | 0.14                                    | 29.1      | 36       | HiSeq-Illumi       | 24745044                     | Sunagawa et al. Science 22 May 2015: Vol. 348, Issue 6373                                                                                     |
| SAMEA2620413 | European Nucleotide Archive | TARA_048_SRF_0.1-0.22             | Indian Ocean [MRGID:1904]          | Indian Ocean | -9.392   | 66.423    | 5.4       | 187.3                    | 0.05                                   | 0.01                                   | 0.08                                    | 29.8      | 34.2     | HiSeq-Illumi       | 82925072                     | Sunagawa et al. Science 22 May 2015: Vol. 348, Issue 6373                                                                                     |
| SAMEA2620651 | European Nucleotide Archive | TARA_056_SRF_0.22-3               | Indian Ocean [MRGID:1904]          | Indian Ocean | -15.342  | 43.297    | 5.5       | 193.1                    |                                        |                                        |                                         | 27.3      | 35       | HiSeq-Illumi       | 152134585                    | Sunagawa et al. Science 22 May 2015: Vol. 348, Issue 6373                                                                                     |

|              |                             |                              |                                                     |                   |         |          |      |       |       |      |      |       |       |              |              |                                                           |                                                           |
|--------------|-----------------------------|------------------------------|-----------------------------------------------------|-------------------|---------|----------|------|-------|-------|------|------|-------|-------|--------------|--------------|-----------------------------------------------------------|-----------------------------------------------------------|
| SAMEA2620672 | European Nucleotide Archive | TARA_057_SRF_0.22-3          | Indian Ocean [MRGID:1904]                           | Indian Ocean      | -17.025 | 42.740   | 5.6  | 190.1 | -0.02 | 0.02 | 0.00 | 27    | 35.1  | HiSeq-Illumi | 137899254    | Sunagawa et al. Science 22 May 2015: Vol. 348, Issue 6373 |                                                           |
| SAMEA2620734 | European Nucleotide Archive | TARA_058_DCM_0.22-3          | Indian Ocean [MRGID:1904]                           | Indian Ocean      | -17.286 | 42.287   | 67.1 | 185.0 | 0.03  | 0.03 | 0.00 | 25.3  | 35.2  | HiSeq-Illumi | 150840420    | Sunagawa et al. Science 22 May 2015: Vol. 348, Issue 6373 |                                                           |
| SAMEA2620756 | European Nucleotide Archive | TARA_062_SRF_0.22-3          | Indian Ocean [MRGID:1904]                           | Indian Ocean      | -22.337 | 40.341   | 5.4  | 199.9 |       |      |      | 25.1  | 35.3  | HiSeq-Illumi | 126656804    | Sunagawa et al. Science 22 May 2015: Vol. 348, Issue 6373 |                                                           |
| SAMEA2620836 | European Nucleotide Archive | TARA_064_DCM_0.1-0.22        | Indian Ocean [MRGID:1904]                           | Indian Ocean      | -29.533 | 37.912   | 63.6 | 207.4 | 0.02  | 0.00 | 0.08 | 22.3  | 35.3  | HiSeq-Illumi | 51316051     | Sunagawa et al. Science 22 May 2015: Vol. 348, Issue 6373 |                                                           |
| SAMEA2620828 | European Nucleotide Archive | TARA_064_DCM_0.22-3          | Indian Ocean [MRGID:1904]                           | Indian Ocean      | -29.533 | 37.912   | 63.6 | 207.4 | 0.02  | 0.00 | 0.08 | 22.3  | 35.3  | HiSeq-Illumi | 141276880    | Sunagawa et al. Science 22 May 2015: Vol. 348, Issue 6373 |                                                           |
| SAMEA2620786 | European Nucleotide Archive | TARA_064_SRF_0.22-3          | Indian Ocean [MRGID:1904]                           | Indian Ocean      | -29.502 | 37.989   | 5.5  | 210.0 | 0.00  | 0.00 | 0.08 | 22.2  | 35.3  | HiSeq-Illumi | 282205808    | Sunagawa et al. Science 22 May 2015: Vol. 348, Issue 6373 |                                                           |
| SAMEA2620894 | European Nucleotide Archive | TARA_065_DCM_0.1-0.22        | Indian Ocean [MRGID:1904]                           | Indian Ocean      | -35.242 | 26.305   | 28.7 | 206.4 |       |      |      |       | 21.8  | HiSeq-Illumi | 81813162     | Sunagawa et al. Science 22 May 2015: Vol. 348, Issue 6373 |                                                           |
| SAMEA2620890 | European Nucleotide Archive | TARA_065_DCM_0.22-3          | Indian Ocean [MRGID:1904]                           | Indian Ocean      | -35.242 | 26.305   | 28.7 | 206.4 |       |      |      |       | 21.8  | HiSeq-Illumi | 196548092    | Sunagawa et al. Science 22 May 2015: Vol. 348, Issue 6373 |                                                           |
| SAMEA2620861 | European Nucleotide Archive | TARA_065_SRF_0.1-0.22        | Indian Ocean [MRGID:1904]                           | Indian Ocean      | -35.173 | 26.287   | 5.9  | 207.0 |       |      |      |       | 21.8  | 35.4         | HiSeq-Illumi | 79943254                                                  | Sunagawa et al. Science 22 May 2015: Vol. 348, Issue 6373 |
| SAMEA2620855 | European Nucleotide Archive | TARA_065_SRF_0.22-3          | Indian Ocean [MRGID:1904]                           | Indian Ocean      | -35.173 | 26.287   | 5.9  | 207.0 |       |      |      |       | 21.8  | 35.4         | HiSeq-Illumi | 107392199                                                 | Sunagawa et al. Science 22 May 2015: Vol. 348, Issue 6373 |
| SRX672316    | NCBI SRA                    | Mediterranean_DCM_JUL2012-LF | Mediterranean Sea                                   | Mediterranean Sea | 38.068  | -0.232   | 75   |       |       |      |      |       |       | HiSeq-Illumi | 6651036      | Martin-Cuadrado et al. ISME J. 2015 Jul;9(7):1619-34.     |                                                           |
| SRX672099    | NCBI SRA                    | Mediterranean_DCM_JUN2009-LF | Mediterranean Sea                                   | Mediterranean Sea | 38.068  | -0.232   | 65   |       |       |      |      |       |       | HiSeq-Illumi | 32129968     | Martin-Cuadrado et al. ISME J. 2015 Jul;9(7):1619-34.     |                                                           |
| SRX672291    | NCBI SRA                    | Mediterranean_DCM_SEP2013    | Mediterranean Sea                                   | Mediterranean Sea | 38.068  | -0.232   | 55   |       |       |      |      |       |       | HiSeq-Illumi | 52511073     | Martin-Cuadrado et al. ISME J. 2015 Jul;9(7):1619-34.     |                                                           |
| SRX672326    | NCBI SRA                    | Mediterranean_DCM_SEP2013-LF | Mediterranean Sea                                   | Mediterranean Sea | 38.068  | -0.232   | 55   |       |       |      |      |       |       | HiSeq-Illumi | 37121672     | Martin-Cuadrado et al. ISME J. 2015 Jul;9(7):1619-34.     |                                                           |
| SAMEA2591074 | European Nucleotide Archive | TARA_007_DCM_0.22-1.6        | Mediterranean Sea [MRGID:1905]                      | Mediterranean Sea | 37.054  | 1.948    | 41.7 |       | 0.03  | 0.00 | 0.01 | 17.4  |       | HiSeq-Illumi | 54648479     | Sunagawa et al. Science 22 May 2015: Vol. 348, Issue 6373 |                                                           |
| SAMEA2591057 | European Nucleotide Archive | TARA_007_SRF_0.22-1.6        | Mediterranean Sea [MRGID:1905]                      | Mediterranean Sea | 37.051  | 1.938    | 7.5  |       | 0.03  | 0.00 | 0.06 | 23.8  | 37.5  | HiSeq-Illumi | 59116478     | Sunagawa et al. Science 22 May 2015: Vol. 348, Issue 6373 |                                                           |
| SAMEA2619548 | European Nucleotide Archive | TARA_009_DCM_0.22-1.6        | Mediterranean Sea [MRGID:1905]                      | Mediterranean Sea | 39.061  | 5.942    | 55   |       | 0.06  | 0.02 | 0.02 | 16.2  | 37.8  | HiSeq-Illumi | 166347645    | Sunagawa et al. Science 22 May 2015: Vol. 348, Issue 6373 |                                                           |
| SAMEA2619531 | European Nucleotide Archive | TARA_009_SRF_0.22-1.6        | Mediterranean Sea [MRGID:1905]                      | Mediterranean Sea | 39.163  | 5.916    | 5.8  |       | 0.02  | 0.01 | 0.02 | 23.9  | 38    | HiSeq-Illumi | 211904463    | Sunagawa et al. Science 22 May 2015: Vol. 348, Issue 6373 |                                                           |
| SAMEA2619678 | European Nucleotide Archive | TARA_018_DCM_0.22-1.6        | Mediterranean Sea [MRGID:1905]                      | Mediterranean Sea | 35.753  | 14.277   | 61.6 | 237.9 | -0.01 | 0.03 | 0.01 | 18.4  | 37.9  | HiSeq-Illumi | 180928152    | Sunagawa et al. Science 22 May 2015: Vol. 348, Issue 6373 |                                                           |
| SAMEA2619667 | European Nucleotide Archive | TARA_018_SRF_0.22-1.6        | Mediterranean Sea [MRGID:1905]                      | Mediterranean Sea | 35.759  | 14.257   | 5.4  | 207.8 | 0.10  | 0.02 | 0.03 | 21.4  | 37.9  | HiSeq-Illumi | 186901404    | Sunagawa et al. Science 22 May 2015: Vol. 348, Issue 6373 |                                                           |
| SAMEA2591098 | European Nucleotide Archive | TARA_023_DCM_0.22-1.6        | Mediterranean Sea [MRGID:1905]                      | Mediterranean Sea | 42.174  | 17.725   | 55.2 | 224.3 | 0.04  | 0.01 | 0.01 | 15.7  | 38.4  | HiSeq-Illumi | 49930292     | Sunagawa et al. Science 22 May 2015: Vol. 348, Issue 6373 |                                                           |
| SAMEA2591084 | European Nucleotide Archive | TARA_023_SRF_0.22-1.6        | Mediterranean Sea [MRGID:1905]                      | Mediterranean Sea | 42.204  | 17.715   | 5.5  | 220.0 | 0.03  | 0.01 | 0.01 | 17.6  | 38.2  | HiSeq-Illumi | 60142647     | Sunagawa et al. Science 22 May 2015: Vol. 348, Issue 6373 |                                                           |
| SAMEA2619888 | European Nucleotide Archive | TARA_034_SRF_0.1-0.22        | Red Sea                                             | Red Sea           | 18.397  | 39.875   | 5.4  | 184.1 | 0.01  | 0.02 | 0.19 | 27.6  | 38.6  | HiSeq-Illumi | 74437608     | Sunagawa et al. Science 22 May 2015: Vol. 348, Issue 6373 |                                                           |
| SAMN05224470 | NCBI bioproject             | LineP_Aug_2008_P26_10m       | Open ocean waters in North eastern subartic pacific | NESAP             | 50.000  | -145     | 10   | 287.7 |       |      |      | 11.37 | 32.49 | Illumina     | 10976040     | Steven Hallam UBC                                         |                                                           |
| SAMN05224425 | NCBI bioproject             | LineP_Aug_2009_P04_10m       | Coastal waters off Vancouver                        | NESAP             | 48.651  | -126.667 | 10   | 283.4 | 5.30  |      | 0.77 | 12.33 | 32.24 | Illumina     | 28953848     | Steven Hallam UBC                                         |                                                           |



|              |                             |                        |                                                     |                |        |          |       |       |      |      |      |       |       |              |           |                                                           |
|--------------|-----------------------------|------------------------|-----------------------------------------------------|----------------|--------|----------|-------|-------|------|------|------|-------|-------|--------------|-----------|-----------------------------------------------------------|
| SAMN05224414 | NCBI bioproject             | LineP_Aug_2009_P16_10m | Open ocean waters in North eastern subartic pacific | NESAP          | 49.283 | -134.666 | 10    | 258.0 | 3.50 |      | 0.64 | 15.48 | 32.49 | Illumina     | 13008645  | Steven Hallam UBC                                         |
| SAMN05224399 | NCBI bioproject             | LineP_Jun_2009_P04_10m | Coastal waters off Vancouver                        | NESAP          | 48.650 | -126.667 | 10    | 319.8 | 0.40 |      | 0.50 | 10.96 | 32.22 | Illumina     | 11886673  | Steven Hallam UBC                                         |
| SAMEA2619399 | European Nucleotide Archive | TARA_004_DCM_0.22-1.6  | North Atlantic Ocean [MRGID:1912]                   | North Atlantic | 36.553 | -6.567   | 38.7  |       |      |      |      | 16.2  | 36.6  | HiSeq-Illumi | 29618354  | Sunagawa et al. Science 22 May 2015: Vol. 348, Issue 6373 |
| SAMEA2619376 | European Nucleotide Archive | TARA_004_SRF_0.22-1.6  | North Atlantic Ocean [MRGID:1912]                   | North Atlantic | 36.553 | -6.567   | 10    |       |      |      |      | 20.5  | 36.6  | HiSeq-Illumi | 152438622 | Sunagawa et al. Science 22 May 2015: Vol. 348, Issue 6373 |
| SAMEA2623446 | European Nucleotide Archive | TARA_141_SRF_0.22-3    | North Atlantic Ocean [MRGID:1912]                   | North Atlantic | 9.848  | -80.045  | 5.4   | 195.5 | 0.00 | 0.00 | 0.01 | 27.1  | 34.3  | HiSeq-Illumi | 140182768 | Sunagawa et al. Science 22 May 2015: Vol. 348, Issue 6373 |
| SAMEA2623488 | European Nucleotide Archive | TARA_142_DCM_0.22-3    | North Atlantic Ocean [MRGID:1912]                   | North Atlantic | 25.617 | -88.453  | 123.7 | 193.0 | 0.04 | 0.02 | 0.02 | 24.9  | 36.2  | HiSeq-Illumi | 142314010 | Sunagawa et al. Science 22 May 2015: Vol. 348, Issue 6373 |
| SAMEA2623463 | European Nucleotide Archive | TARA_142_SRF_0.22-3    | North Atlantic Ocean [MRGID:1912]                   | North Atlantic | 25.526 | -88.394  | 5.4   | 194.3 | 0.03 | 0.02 | 0.00 | 25    | 36.2  | HiSeq-Illumi | 144764785 | Sunagawa et al. Science 22 May 2015: Vol. 348, Issue 6373 |
| SAMEA2623627 | European Nucleotide Archive | TARA_145_SRF_0.22-3    | North Atlantic Ocean [MRGID:1912]                   | North Atlantic | 39.231 | -70.038  | 5.5   | 233.9 | 4.27 | 0.11 | 0.35 | 14.1  | 35.2  | HiSeq-Illumi | 143074884 | Sunagawa et al. Science 22 May 2015: Vol. 348, Issue 6373 |
| SAMEA2623673 | European Nucleotide Archive | TARA_146_SRF_0.22-3    | North Atlantic Ocean [MRGID:1912]                   | North Atlantic | 34.671 | -71.309  | 11.7  | 214.4 | 0.52 | 0.22 | 0.02 | 19.1  | 36.5  | HiSeq-Illumi | 155009509 | Sunagawa et al. Science 22 May 2015: Vol. 348, Issue 6373 |
| SAMEA2623734 | European Nucleotide Archive | TARA_148_SRF_0.22-3    | North Atlantic Ocean [MRGID:1912]                   | North Atlantic | 31.695 | -64.249  | 6.1   | 212.6 | 0.06 | 0.09 | 0.00 | 20.4  | 36.6  | HiSeq-Illumi | 151176043 | Sunagawa et al. Science 22 May 2015: Vol. 348, Issue 6373 |
| SAMEA2623756 | European Nucleotide Archive | TARA_148b_MES_0.22-3   | North Atlantic Ocean [MRGID:1912]                   | North Atlantic | 34.150 | -56.968  | 246.4 | 191.8 | 4.10 | 0.03 | 0.18 | 18.2  | 36.6  | HiSeq-Illumi | 149653178 | Sunagawa et al. Science 22 May 2015: Vol. 348, Issue 6373 |
| SAMEA2623774 | European Nucleotide Archive | TARA_149_SRF_0.22-3    | North Atlantic Ocean [MRGID:1912]                   | North Atlantic | 34.113 | -49.918  | 5.5   | 220.2 | 0.43 | 0.25 | 0.06 | 18.7  | 36.4  | HiSeq-Illumi | 161799052 | Sunagawa et al. Science 22 May 2015: Vol. 348, Issue 6373 |
| SAMEA2623826 | European Nucleotide Archive | TARA_150_DCM_0.22-3    | North Atlantic Ocean [MRGID:1912]                   | North Atlantic | 35.843 | -37.153  | 39.8  | 230.1 | 0.13 | 0.04 | 0.00 | 17.7  | 36.2  | HiSeq-Illumi | 162316515 | Sunagawa et al. Science 22 May 2015: Vol. 348, Issue 6373 |
| SAMEA2623808 | European Nucleotide Archive | TARA_150_SRF_0.22-3    | North Atlantic Ocean [MRGID:1912]                   | North Atlantic | 35.935 | -37.303  | 5.5   | 228.4 | 0.13 | 0.04 | 0.01 | 17.6  | 36.3  | HiSeq-Illumi | 173070328 | Sunagawa et al. Science 22 May 2015: Vol. 348, Issue 6373 |
| SAMEA2623868 | European Nucleotide Archive | TARA_151_DCM_0.22-3    | North Atlantic Ocean [MRGID:1912]                   | North Atlantic | 36.181 | -28.937  | 77.6  | 228.5 | 0.04 | 0.01 | 0.01 | 16.8  | 36.2  | HiSeq-Illumi | 157338966 | Sunagawa et al. Science 22 May 2015: Vol. 348, Issue 6373 |
| SAMEA2623850 | European Nucleotide Archive | TARA_151_SRF_0.22-3    | North Atlantic Ocean [MRGID:1912]                   | North Atlantic | 36.172 | -29.023  | 5.4   | 232.1 | 0.00 | 0.02 | 0.01 | 17.3  | 36.2  | HiSeq-Illumi | 173320739 | Sunagawa et al. Science 22 May 2015: Vol. 348, Issue 6373 |
| SAMEA2623919 | European Nucleotide Archive | TARA_152_MIX_0.22-3    | North Atlantic Ocean [MRGID:1912]                   | North Atlantic | 43.706 | -16.879  | 23.9  | 239.4 | 1.94 | 0.32 | 0.17 | 14.3  | 36    | HiSeq-Illumi | 173137389 | Sunagawa et al. Science 22 May 2015: Vol. 348, Issue 6373 |
| SAMEA2623886 | European Nucleotide Archive | TARA_152_SRF_0.22-3    | North Atlantic Ocean [MRGID:1912]                   | North Atlantic | 43.679 | -16.834  | 5.4   | 243.1 | 1.85 | 0.31 | 0.16 | 14.3  | 36    | HiSeq-Illumi | 144261764 | Sunagawa et al. Science 22 May 2015: Vol. 348, Issue 6373 |
| SAMEA2622336 | European Nucleotide Archive | TARA_109_DCM_0.22-3    | North Pacific Ocean [MRGID:1908]                    | North Pacific  | 2.030  | -84.555  | 29.8  | 203.1 | 4.49 | 0.11 | 0.50 | 26.5  | 34.3  | HiSeq-Illumi | 137818935 | Sunagawa et al. Science 22 May 2015: Vol. 348, Issue 6373 |
| SAMEA2622316 | European Nucleotide Archive | TARA_109_SRF_0.22-3    | North Pacific Ocean [MRGID:1908]                    | North Pacific  | 1.993  | -84.577  | 5.4   | 198.6 | 0.86 | 0.04 | 0.27 | 27.6  | 33.4  | HiSeq-Illumi | 169531608 | Sunagawa et al. Science 22 May 2015: Vol. 348, Issue 6373 |
| SAMEA2623079 | European Nucleotide Archive | TARA_132_DCM_0.22-3    | North Pacific Ocean [MRGID:1908]                    | North Pacific  | 31.517 | -159.046 | 113.8 | 225.5 | 0.03 | 0.02 | 0.13 | 15.3  | 34.4  | HiSeq-Illumi | 220688156 | Sunagawa et al. Science 22 May 2015: Vol. 348, Issue 6373 |
| SAMEA2623059 | European Nucleotide Archive | TARA_132_SRF_0.22-3    | North Pacific Ocean [MRGID:1908]                    | North Pacific  | 31.521 | -158.996 | 5.5   | 197.7 | 0.01 | 0.00 | 0.01 | 25.2  | 35.2  | HiSeq-Illumi | 148553071 | Sunagawa et al. Science 22 May 2015: Vol. 348, Issue 6373 |
| SAMEA2623135 | European Nucleotide Archive | TARA_133_DCM_0.22-3    | North Pacific Ocean [MRGID:1908]                    | North Pacific  | 35.400 | -127.750 | 47.2  | 227.7 | 1.22 | 0.08 | 0.46 | 13.2  | 33.2  | HiSeq-Illumi | 159687766 | Sunagawa et al. Science 22 May 2015: Vol. 348, Issue 6373 |
| SAMEA2623116 | European Nucleotide Archive | TARA_133_SRF_0.22-3    | North Pacific Ocean [MRGID:1908]                    | North Pacific  | 35.367 | -127.742 | 5.5   | 224.4 | 0.02 | 0.00 | 0.29 | 19.2  | 33.1  | HiSeq-Illumi | 235552324 | Sunagawa et al. Science 22 May 2015: Vol. 348, Issue 6373 |
| SAMEA2623295 | European Nucleotide Archive | TARA_137_DCM_0.22-3    | North Pacific Ocean [MRGID:1908]                    | North Pacific  | 14.208 | -116.647 | 44.2  | 95.4  | 5.74 | 0.31 | 0.88 | 18.6  | 34.4  | HiSeq-Illumi | 180592631 | Sunagawa et al. Science 22 May 2015: Vol. 348, Issue 6373 |

|              |                             |                        |                                   |                |         |          |      |       |       |      |      |      |      |              |           |                                                           |
|--------------|-----------------------------|------------------------|-----------------------------------|----------------|---------|----------|------|-------|-------|------|------|------|------|--------------|-----------|-----------------------------------------------------------|
| SAMEA2623275 | European Nucleotide Archive | TARA_137_SRF_0.22-3    | North Pacific Ocean [MRGID:1908]  | North Pacific  | 14.204  | -116.626 | 5.4  | 195.1 | 2.37  | 0.07 | 0.46 | 26.4 | 33.9 | HiSeq-Illumi | 166511956 | Sunagawa et al. Science 22 May 2015: Vol. 348, Issue 6373 |
| SAMEA2623370 | European Nucleotide Archive | TARA_138_DCM_0.22-3    | North Pacific Ocean [MRGID:1908]  | North Pacific  | 6.338   | -102.954 | 58.1 | 77.0  | 12.07 | 0.83 | 1.11 | 19   | 34.6 | HiSeq-Illumi | 154522283 | Sunagawa et al. Science 22 May 2015: Vol. 348, Issue 6373 |
| SAMEA2623350 | European Nucleotide Archive | TARA_138_SRF_0.22-3    | North Pacific Ocean [MRGID:1908]  | North Pacific  | 6.333   | -102.943 | 5.4  | 196.9 | 0.00  | 0.00 | 0.16 | 26.6 | 33.4 | HiSeq-Illumi | 157012629 | Sunagawa et al. Science 22 May 2015: Vol. 348, Issue 6373 |
| SAMEA2623426 | European Nucleotide Archive | TARA_140_SRF_0.22-3    | North Pacific Ocean [MRGID:1908]  | North Pacific  | 7.412   | -79.302  | 5.4  | 205.3 | 0.00  | 0.00 | 0.08 | 26.6 | 28.9 | HiSeq-Illumi | 170358537 | Sunagawa et al. Science 22 May 2015: Vol. 348, Issue 6373 |
| SAMEA2620950 | European Nucleotide Archive | TARA_066_DCM_0.22-3    | South Atlantic Ocean [MRGID:1914] | South Atlantic | -34.890 | 18.046   | 28.6 | 240.4 | 2.97  | 0.26 | 0.37 | 15   | 35.3 | HiSeq-Illumi | 62835775  | Sunagawa et al. Science 22 May 2015: Vol. 348, Issue 6373 |
| SAMEA2620929 | European Nucleotide Archive | TARA_066_SRF_0.22-3    | South Atlantic Ocean [MRGID:1914] | South Atlantic | -34.945 | 17.919   | 5.4  | 238.9 | 3.04  | 0.30 | 0.34 | 15   | 35.3 | HiSeq-Illumi | 127013558 | Sunagawa et al. Science 22 May 2015: Vol. 348, Issue 6373 |
| SAMEA2620979 | European Nucleotide Archive | TARA_067_SRF_0.22-0.45 | South Atlantic Ocean [MRGID:1914] | South Atlantic | -32.240 | 17.710   | 5.5  | 249.4 | 6.92  | 0.17 | 1.02 | 12.8 | 34.8 | HiSeq-Illumi | 158396282 | Sunagawa et al. Science 22 May 2015: Vol. 348, Issue 6373 |
| SAMEA2620970 | European Nucleotide Archive | TARA_067_SRF_0.22-3    | South Atlantic Ocean [MRGID:1914] | South Atlantic | -32.240 | 17.710   | 5.5  | 249.4 | 6.92  | 0.17 | 1.02 | 12.8 | 34.8 | HiSeq-Illumi | 69017274  | Sunagawa et al. Science 22 May 2015: Vol. 348, Issue 6373 |
| SAMEA2620980 | European Nucleotide Archive | TARA_067_SRF_0.45-0.8  | South Atlantic Ocean [MRGID:1914] | South Atlantic | -32.240 | 17.710   | 5.5  | 249.4 | 6.92  | 0.17 | 1.02 | 12.8 | 34.8 | HiSeq-Illumi | 155390499 | Sunagawa et al. Science 22 May 2015: Vol. 348, Issue 6373 |
| SAMEA2621044 | European Nucleotide Archive | TARA_068_DCM_0.22-0.45 | South Atlantic Ocean [MRGID:1914] | South Atlantic | -31.027 | 4.680    | 40.3 | 231.7 | 0.79  | 0.29 | 0.23 | 16.8 | 35.7 | HiSeq-Illumi | 142116093 | Sunagawa et al. Science 22 May 2015: Vol. 348, Issue 6373 |
| SAMEA2621037 | European Nucleotide Archive | TARA_068_DCM_0.22-3    | South Atlantic Ocean [MRGID:1914] | South Atlantic | -31.027 | 4.680    | 40.3 | 231.7 | 0.79  | 0.29 | 0.23 | 16.8 | 35.7 | HiSeq-Illumi | 72584098  | Sunagawa et al. Science 22 May 2015: Vol. 348, Issue 6373 |
| SAMEA2621045 | European Nucleotide Archive | TARA_068_DCM_0.45-0.8  | South Atlantic Ocean [MRGID:1914] | South Atlantic | -31.027 | 4.680    | 40.3 | 231.7 | 0.79  | 0.29 | 0.23 | 16.8 | 35.7 | HiSeq-Illumi | 118524702 | Sunagawa et al. Science 22 May 2015: Vol. 348, Issue 6373 |
| SAMEA2621020 | European Nucleotide Archive | TARA_068_SRF_0.22-0.45 | South Atlantic Ocean [MRGID:1914] | South Atlantic | -31.027 | 4.665    | 5.4  | 231.9 | 1.05  | 0.25 | 0.23 | 16.8 | 35.7 | HiSeq-Illumi | 127126692 | Sunagawa et al. Science 22 May 2015: Vol. 348, Issue 6373 |
| SAMEA2621013 | European Nucleotide Archive | TARA_068_SRF_0.22-3    | South Atlantic Ocean [MRGID:1914] | South Atlantic | -31.027 | 4.665    | 5.4  | 231.9 | 1.05  | 0.25 | 0.23 | 16.8 | 35.7 | HiSeq-Illumi | 99179064  | Sunagawa et al. Science 22 May 2015: Vol. 348, Issue 6373 |
| SAMEA2621021 | European Nucleotide Archive | TARA_068_SRF_0.45-0.8  | South Atlantic Ocean [MRGID:1914] | South Atlantic | -31.027 | 4.665    | 5.4  | 231.9 | 1.05  | 0.25 | 0.23 | 16.8 | 35.7 | HiSeq-Illumi | 156173417 | Sunagawa et al. Science 22 May 2015: Vol. 348, Issue 6373 |
| SAMEA2621075 | European Nucleotide Archive | TARA_070_SRF_0.22-0.45 | South Atlantic Ocean [MRGID:1914] | South Atlantic | -20.409 | -3.176   | 5.4  | 215.7 | 0.94  | 0.05 | 0.36 | 19.8 | 36.4 | HiSeq-Illumi | 173683964 | Sunagawa et al. Science 22 May 2015: Vol. 348, Issue 6373 |
| SAMEA2621066 | European Nucleotide Archive | TARA_070_SRF_0.22-3    | South Atlantic Ocean [MRGID:1914] | South Atlantic | -20.409 | -3.176   | 5.4  | 215.7 | 0.94  | 0.05 | 0.36 | 19.8 | 36.4 | HiSeq-Illumi | 94196162  | Sunagawa et al. Science 22 May 2015: Vol. 348, Issue 6373 |
| SAMEA2621076 | European Nucleotide Archive | TARA_070_SRF_0.45-0.8  | South Atlantic Ocean [MRGID:1914] | South Atlantic | -20.409 | -3.176   | 5.4  | 215.7 | 0.94  | 0.05 | 0.36 | 19.8 | 36.4 | HiSeq-Illumi | 161588490 | Sunagawa et al. Science 22 May 2015: Vol. 348, Issue 6373 |
| SAMEA2621155 | European Nucleotide Archive | TARA_072_DCM_0.22-3    | South Atlantic Ocean [MRGID:1914] | South Atlantic | -8.730  | -17.960  | 95.4 | 194.4 | 0.03  | 0.01 | 0.14 | 24.1 | 36.6 | HiSeq-Illumi | 115780700 | Sunagawa et al. Science 22 May 2015: Vol. 348, Issue 6373 |
| SAMEA2621132 | European Nucleotide Archive | TARA_072_SRF_0.22-3    | South Atlantic Ocean [MRGID:1914] | South Atlantic | -8.779  | -17.910  | 5.8  | 199.1 | 0.02  | 0.00 | 0.10 | 25   | 36.4 | HiSeq-Illumi | 185942437 | Sunagawa et al. Science 22 May 2015: Vol. 348, Issue 6373 |
| SAMEA2621221 | European Nucleotide Archive | TARA_076_DCM_0.22-0.45 | South Atlantic Ocean [MRGID:1914] | South Atlantic | -21.029 | -35.350  | 148  | 203.8 | -0.02 | 0.02 | 0.04 | 21.6 | 36.7 | HiSeq-Illumi | 148812120 | Sunagawa et al. Science 22 May 2015: Vol. 348, Issue 6373 |
| SAMEA2621216 | European Nucleotide Archive | TARA_076_DCM_0.22-3    | South Atlantic Ocean [MRGID:1914] | South Atlantic | -21.029 | -35.350  | 148  | 203.8 | -0.02 | 0.02 | 0.04 | 21.6 | 36.7 | HiSeq-Illumi | 175304252 | Sunagawa et al. Science 22 May 2015: Vol. 348, Issue 6373 |
| SAMEA2621222 | European Nucleotide Archive | TARA_076_DCM_0.45-0.8  | South Atlantic Ocean [MRGID:1914] | South Atlantic | -21.029 | -35.350  | 148  | 203.8 | -0.02 | 0.02 | 0.04 | 21.6 | 36.7 | HiSeq-Illumi | 99420785  | Sunagawa et al. Science 22 May 2015: Vol. 348, Issue 6373 |
| SAMEA2621203 | European Nucleotide Archive | TARA_076_SRF_0.22-0.45 | South Atlantic Ocean [MRGID:1914] | South Atlantic | -20.935 | -35.180  | 5.5  | 206.2 | 0.00  | 0.00 | 0.06 | 23.3 | 37.1 | HiSeq-Illumi | 174321237 | Sunagawa et al. Science 22 May 2015: Vol. 348, Issue 6373 |
| SAMEA2621198 | European Nucleotide Archive | TARA_076_SRF_0.22-3    | South Atlantic Ocean [MRGID:1914] | South Atlantic | -20.935 | -35.180  | 5.5  | 206.2 | 0.00  | 0.00 | 0.06 | 23.3 | 37.1 | HiSeq-Illumi | 180079780 | Sunagawa et al. Science 22 May 2015: Vol. 348, Issue 6373 |

|              |                             |                        |                                   |                |         |          |       |       |       |      |      |      |      |              |           |                                                           |
|--------------|-----------------------------|------------------------|-----------------------------------|----------------|---------|----------|-------|-------|-------|------|------|------|------|--------------|-----------|-----------------------------------------------------------|
| SAMEA2621204 | European Nucleotide Archive | TARA_076_SRF_0.45-0.8  | South Atlantic Ocean [MRGID:1914] | South Atlantic | -20.935 | -35.180  | 5.5   | 206.2 | 0.00  | 0.00 | 0.06 | 23.3 | 37.1 | HiSeq-Illumi | 138195772 | Sunagawa et al. Science 22 May 2015: Vol. 348, Issue 6373 |
| SAMEA2621277 | European Nucleotide Archive | TARA_078_DCM_0.22-0.45 | South Atlantic Ocean [MRGID:1914] | South Atlantic | -30.148 | -43.271  | 118.3 | 217.1 | 0.05  | 0.05 | 0.00 | 19.3 | 36.3 | HiSeq-Illumi | 147446967 | Sunagawa et al. Science 22 May 2015: Vol. 348, Issue 6373 |
| SAMEA2621272 | European Nucleotide Archive | TARA_078_DCM_0.22-3    | South Atlantic Ocean [MRGID:1914] | South Atlantic | -30.148 | -43.271  | 118.3 | 217.1 | 0.05  | 0.05 | 0.00 | 19.3 | 36.3 | HiSeq-Illumi | 167819047 | Sunagawa et al. Science 22 May 2015: Vol. 348, Issue 6373 |
| SAMEA2621278 | European Nucleotide Archive | TARA_078_DCM_0.45-0.8  | South Atlantic Ocean [MRGID:1914] | South Atlantic | -30.148 | -43.271  | 118.3 | 217.1 | 0.05  | 0.05 | 0.00 | 19.3 | 36.3 | HiSeq-Illumi | 127093281 | Sunagawa et al. Science 22 May 2015: Vol. 348, Issue 6373 |
| SAMEA2621259 | European Nucleotide Archive | TARA_078_SRF_0.22-0.45 | South Atlantic Ocean [MRGID:1914] | South Atlantic | -30.137 | -43.290  | 5.6   | 221.5 | 0.02  | 0.00 | 0.00 | 19.9 | 36.3 | HiSeq-Illumi | 143025080 | Sunagawa et al. Science 22 May 2015: Vol. 348, Issue 6373 |
| SAMEA2621254 | European Nucleotide Archive | TARA_078_SRF_0.22-3    | South Atlantic Ocean [MRGID:1914] | South Atlantic | -30.137 | -43.290  | 5.6   | 221.5 | 0.02  | 0.00 | 0.00 | 19.9 | 36.3 | HiSeq-Illumi | 165250546 | Sunagawa et al. Science 22 May 2015: Vol. 348, Issue 6373 |
| SAMEA2621260 | European Nucleotide Archive | TARA_078_SRF_0.45-0.8  | South Atlantic Ocean [MRGID:1914] | South Atlantic | -30.137 | -43.290  | 5.6   | 221.5 | 0.02  | 0.00 | 0.00 | 19.9 | 36.3 | HiSeq-Illumi | 111032501 | Sunagawa et al. Science 22 May 2015: Vol. 348, Issue 6373 |
| SAMEA2621423 | European Nucleotide Archive | TARA_082_DCM_0.22-3    | South Atlantic Ocean [MRGID:1914] | South Atlantic | -47.201 | -57.945  | 41.8  | 306.2 | 18.93 | 0.14 | 1.42 | 7    | 34.1 | HiSeq-Illumi | 192678074 | Sunagawa et al. Science 22 May 2015: Vol. 348, Issue 6373 |
| SAMEA2621401 | European Nucleotide Archive | TARA_082_SRF_0.22-3    | South Atlantic Ocean [MRGID:1914] | South Atlantic | -47.186 | -58.290  | 5.5   | 305.0 | 18.00 | 0.15 | 1.30 | 7.3  | 34   | HiSeq-Illumi | 104910011 | Sunagawa et al. Science 22 May 2015: Vol. 348, Issue 6373 |
| SAMEA2621812 | European Nucleotide Archive | TARA_093_DCM_0.22-3    | South Pacific Ocean [MRGID:1910]  | South Pacific  | -33.912 | -73.054  | 33.8  | 237.2 | 7.18  | 0.37 | 1.07 | 16.4 | 34.3 | HiSeq-Illumi | 154040756 | Sunagawa et al. Science 22 May 2015: Vol. 348, Issue 6373 |
| SAMEA2621779 | European Nucleotide Archive | TARA_093_SRF_0.22-3    | South Pacific Ocean [MRGID:1910]  | South Pacific  | -34.061 | -73.107  | 5.3   | 244.9 | 0.01  | 0.01 | 0.52 | 18   | 34.3 | HiSeq-Illumi | 130621917 | Sunagawa et al. Science 22 May 2015: Vol. 348, Issue 6373 |
| SAMEA2621839 | European Nucleotide Archive | TARA_094_SRF_0.22-3    | South Pacific Ocean [MRGID:1910]  | South Pacific  | -32.797 | -87.069  | 5.4   | 219.2 | 0.03  | 0.00 | 0.28 | 21.1 | 34.7 | HiSeq-Illumi | 195083051 | Sunagawa et al. Science 22 May 2015: Vol. 348, Issue 6373 |
| SAMEA2621859 | European Nucleotide Archive | TARA_096_SRF_0.22-3    | South Pacific Ocean [MRGID:1910]  | South Pacific  | -29.724 | -101.160 | 5.5   | 204.1 | 0.02  | 0.00 | 0.16 | 23.8 | 35.8 | HiSeq-Illumi | 170572909 | Sunagawa et al. Science 22 May 2015: Vol. 348, Issue 6373 |
| SAMEA2622021 | European Nucleotide Archive | TARA_098_DCM_0.22-3    | South Pacific Ocean [MRGID:1910]  | South Pacific  | -25.826 | -111.729 | 183.3 | 210.6 | 0.03  | 0.02 | 0.10 | 20.2 | 35.8 | HiSeq-Illumi | 116973594 | Sunagawa et al. Science 22 May 2015: Vol. 348, Issue 6373 |
| SAMEA2621990 | European Nucleotide Archive | TARA_098_SRF_0.22-3    | South Pacific Ocean [MRGID:1910]  | South Pacific  | -25.805 | -111.720 | 5.6   | 200.5 | 0.05  | 0.00 | 0.20 | 25.1 | 36.4 | HiSeq-Illumi | 111583396 | Sunagawa et al. Science 22 May 2015: Vol. 348, Issue 6373 |
| SAMEA2622074 | European Nucleotide Archive | TARA_099_SRF_0.22-3    | South Pacific Ocean [MRGID:1910]  | South Pacific  | -21.146 | -104.787 | 5.4   | 204.0 | 0.04  | 0.00 | 0.29 | 23.8 | 36.1 | HiSeq-Illumi | 145400798 | Sunagawa et al. Science 22 May 2015: Vol. 348, Issue 6373 |
| SAMEA2622119 | European Nucleotide Archive | TARA_100_DCM_0.22-3    | South Pacific Ocean [MRGID:1910]  | South Pacific  | -12.972 | -96.012  | 57.6  | 216.8 | 5.54  | 0.16 | 0.78 | 20.6 | 35.5 | HiSeq-Illumi | 148309956 | Sunagawa et al. Science 22 May 2015: Vol. 348, Issue 6373 |
| SAMEA2622149 | European Nucleotide Archive | TARA_100_MES_0.22-3    | South Pacific Ocean [MRGID:1910]  | South Pacific  | -12.979 | -96.023  | 175.3 | 0.7   | 23.87 | 0.03 | 2.68 | 13   | 34.8 | HiSeq-Illumi | 167230059 | Sunagawa et al. Science 22 May 2015: Vol. 348, Issue 6373 |
| SAMEA2622097 | European Nucleotide Archive | TARA_100_SRF_0.22-3    | South Pacific Ocean [MRGID:1910]  | South Pacific  | -13.002 | -95.976  | 5.5   | 200.2 | 6.06  | 0.14 | 0.68 | 25.3 | 35.8 | HiSeq-Illumi | 175161727 | Sunagawa et al. Science 22 May 2015: Vol. 348, Issue 6373 |
| SAMEA2622219 | European Nucleotide Archive | TARA_102_DCM_0.22-3    | South Pacific Ocean [MRGID:1910]  | South Pacific  | -5.267  | -85.273  | 45.7  | 103.9 | 23.20 | 1.20 | 1.86 | 19.6 | 34.9 | HiSeq-Illumi | 187261361 | Sunagawa et al. Science 22 May 2015: Vol. 348, Issue 6373 |
| SAMEA2622173 | European Nucleotide Archive | TARA_102_SRF_0.22-3    | South Pacific Ocean [MRGID:1910]  | South Pacific  | -5.253  | -85.155  | 5.5   | 206.0 | 12.28 | 0.32 | 1.00 | 24.9 | 34.7 | HiSeq-Illumi | 134073668 | Sunagawa et al. Science 22 May 2015: Vol. 348, Issue 6373 |
| SAMEA2622402 | European Nucleotide Archive | TARA_110_DCM_0.22-3    | South Pacific Ocean [MRGID:1910]  | South Pacific  | -1.900  | -84.627  | 48.7  | 144.6 | 10.29 | 0.41 | 0.93 | 21.8 | 35.1 | HiSeq-Illumi | 186233875 | Sunagawa et al. Science 22 May 2015: Vol. 348, Issue 6373 |
| SAMEA2622376 | European Nucleotide Archive | TARA_110_SRF_0.22-3    | South Pacific Ocean [MRGID:1910]  | South Pacific  | -2.013  | -84.589  | 5.5   | 190.8 | 7.89  | 0.31 | 0.75 | 23.9 | 35   | HiSeq-Illumi | 149505095 | Sunagawa et al. Science 22 May 2015: Vol. 348, Issue 6373 |
| SAMEA2622478 | European Nucleotide Archive | TARA_111_DCM_0.22-3    | South Pacific Ocean [MRGID:1910]  | South Pacific  | -16.959 | -100.675 | 89    | 211.5 | 0.73  | 0.20 | 0.44 | 19.9 | 35.7 | HiSeq-Illumi | 166287723 | Sunagawa et al. Science 22 May 2015: Vol. 348, Issue 6373 |
| SAMEA2622452 | European Nucleotide Archive | TARA_111_SRF_0.22-3    | South Pacific Ocean [MRGID:1910]  | South Pacific  | -16.960 | -100.634 | 5.9   | 208.9 | 2.64  | 0.04 | 0.50 | 22.8 | 36   | HiSeq-Illumi | 172542814 | Sunagawa et al. Science 22 May 2015: Vol. 348, Issue 6373 |

|              |                             |                        |                                  |               |         |          |       |       |      |      |      |      |      |                |           |                                                           |
|--------------|-----------------------------|------------------------|----------------------------------|---------------|---------|----------|-------|-------|------|------|------|------|------|----------------|-----------|-----------------------------------------------------------|
| SAMEA2622545 | European Nucleotide Archive | TARA_112_DCM_0.22-3    | South Pacific Ocean [MRGID:1910] | South Pacific | -23.219 | -129.500 | 153.5 | 207.1 | 0.02 | 0.00 | 0.11 | 22.3 | 35.9 | HiSeq-illumina | 179780813 | Sunagawa et al. Science 22 May 2015: Vol. 348, Issue 6373 |
| SAMEA2622518 | European Nucleotide Archive | TARA_112_SRF_0.22-3    | South Pacific Ocean [MRGID:1910] | South Pacific | -23.281 | -129.395 | 5.4   | 202.2 | 0.02 | 0.01 | 0.14 | 24.2 | 36.5 | HiSeq-illumina | 179430610 | Sunagawa et al. Science 22 May 2015: Vol. 348, Issue 6373 |
| SAMEA2622694 | European Nucleotide Archive | TARA_122_DCM_0.1-0.22  | South Pacific Ocean [MRGID:1910] | South Pacific | -9.006  | -139.139 | 113.3 | 179.9 | 2.70 | 0.10 | 0.59 | 24.7 | 36.1 | HiSeq-illumina | 73542094  | Sunagawa et al. Science 22 May 2015: Vol. 348, Issue 6373 |
| SAMEA2622695 | European Nucleotide Archive | TARA_122_DCM_0.22-0.45 | South Pacific Ocean [MRGID:1910] | South Pacific | -9.006  | -139.139 | 113.3 | 179.9 | 2.70 | 0.10 | 0.59 | 24.7 | 36.1 | HiSeq-illumina | 150764901 | Sunagawa et al. Science 22 May 2015: Vol. 348, Issue 6373 |
| SAMEA2622690 | European Nucleotide Archive | TARA_122_DCM_0.22-3    | South Pacific Ocean [MRGID:1910] | South Pacific | -9.006  | -139.139 | 113.3 | 179.9 | 2.70 | 0.10 | 0.59 | 24.7 | 36.1 | HiSeq-illumina | 138016385 | Sunagawa et al. Science 22 May 2015: Vol. 348, Issue 6373 |
| SAMEA2622696 | European Nucleotide Archive | TARA_122_DCM_0.45-0.8  | South Pacific Ocean [MRGID:1910] | South Pacific | -9.006  | -139.139 | 113.3 | 179.9 | 2.70 | 0.10 | 0.59 | 24.7 | 36.1 | HiSeq-illumina | 154859558 | Sunagawa et al. Science 22 May 2015: Vol. 348, Issue 6373 |
| SAMEA2622656 | European Nucleotide Archive | TARA_122_SRF_0.1-0.22  | South Pacific Ocean [MRGID:1910] | South Pacific | -8.997  | -139.196 | 5.9   | 186.2 | 5.34 | 0.12 | 0.57 | 26.5 | 35.4 | HiSeq-illumina | 72290317  | Sunagawa et al. Science 22 May 2015: Vol. 348, Issue 6373 |
| SAMEA2622657 | European Nucleotide Archive | TARA_122_SRF_0.22-0.45 | South Pacific Ocean [MRGID:1910] | South Pacific | -8.997  | -139.196 | 5.9   | 186.2 | 5.34 | 0.12 | 0.57 | 26.5 | 35.4 | HiSeq-illumina | 112536637 | Sunagawa et al. Science 22 May 2015: Vol. 348, Issue 6373 |
| SAMEA2622652 | European Nucleotide Archive | TARA_122_SRF_0.22-3    | South Pacific Ocean [MRGID:1910] | South Pacific | -8.997  | -139.196 | 5.9   | 186.2 | 5.34 | 0.12 | 0.57 | 26.5 | 35.4 | HiSeq-illumina | 129242788 | Sunagawa et al. Science 22 May 2015: Vol. 348, Issue 6373 |
| SAMEA2622658 | European Nucleotide Archive | TARA_122_SRF_0.45-0.8  | South Pacific Ocean [MRGID:1910] | South Pacific | -8.997  | -139.196 | 5.9   | 186.2 | 5.34 | 0.12 | 0.57 | 26.5 | 35.4 | HiSeq-illumina | 138238123 | Sunagawa et al. Science 22 May 2015: Vol. 348, Issue 6373 |
| SAMEA2622736 | European Nucleotide Archive | TARA_123_MIX_0.1-0.22  | South Pacific Ocean [MRGID:1910] | South Pacific | -8.911  | -140.285 | 148   | 161.3 | 3.96 | 1.47 | 0.66 | 22.1 | 35.9 | HiSeq-illumina | 81886087  | Sunagawa et al. Science 22 May 2015: Vol. 348, Issue 6373 |
| SAMEA2622737 | European Nucleotide Archive | TARA_123_MIX_0.22-0.45 | South Pacific Ocean [MRGID:1910] | South Pacific | -8.911  | -140.285 | 148   | 161.3 | 3.96 | 1.47 | 0.66 | 22.1 | 35.9 | HiSeq-illumina | 150560098 | Sunagawa et al. Science 22 May 2015: Vol. 348, Issue 6373 |
| SAMEA2622733 | European Nucleotide Archive | TARA_123_MIX_0.22-3    | South Pacific Ocean [MRGID:1910] | South Pacific | -8.911  | -140.285 | 148   | 161.3 | 3.96 | 1.47 | 0.66 | 22.1 | 35.9 | HiSeq-illumina | 173529265 | Sunagawa et al. Science 22 May 2015: Vol. 348, Issue 6373 |
| SAMEA2622738 | European Nucleotide Archive | TARA_123_MIX_0.45-0.8  | South Pacific Ocean [MRGID:1910] | South Pacific | -8.911  | -140.285 | 148   | 161.3 | 3.96 | 1.47 | 0.66 | 22.1 | 35.9 | HiSeq-illumina | 137931308 | Sunagawa et al. Science 22 May 2015: Vol. 348, Issue 6373 |
| SAMEA2622715 | European Nucleotide Archive | TARA_123_SRF_0.22-0.45 | South Pacific Ocean [MRGID:1910] | South Pacific | -8.907  | -140.283 | 5.5   | 189.8 | 4.76 | 0.14 | 0.53 | 26.6 | 35.4 | HiSeq-illumina | 171857347 | Sunagawa et al. Science 22 May 2015: Vol. 348, Issue 6373 |
| SAMEA2622710 | European Nucleotide Archive | TARA_123_SRF_0.22-3    | South Pacific Ocean [MRGID:1910] | South Pacific | -8.907  | -140.283 | 5.5   | 189.8 | 4.76 | 0.14 | 0.53 | 26.6 | 35.4 | HiSeq-illumina | 144023698 | Sunagawa et al. Science 22 May 2015: Vol. 348, Issue 6373 |
| SAMEA2622716 | European Nucleotide Archive | TARA_123_SRF_0.45-0.8  | South Pacific Ocean [MRGID:1910] | South Pacific | -8.907  | -140.283 | 5.5   | 189.8 | 4.76 | 0.14 | 0.53 | 26.6 | 35.4 | HiSeq-illumina | 164411353 | Sunagawa et al. Science 22 May 2015: Vol. 348, Issue 6373 |
| SAMEA2622799 | European Nucleotide Archive | TARA_124_MIX_0.1-0.22  | South Pacific Ocean [MRGID:1910] | South Pacific | -9.071  | -140.597 | 118.3 | 175.9 | 0.86 | 0.35 | 0.49 | 25.2 | 35.8 | HiSeq-illumina | 83511924  | Sunagawa et al. Science 22 May 2015: Vol. 348, Issue 6373 |
| SAMEA2622800 | European Nucleotide Archive | TARA_124_MIX_0.22-0.45 | South Pacific Ocean [MRGID:1910] | South Pacific | -9.071  | -140.597 | 118.3 | 175.9 | 0.86 | 0.35 | 0.49 | 25.2 | 35.8 | HiSeq-illumina | 144025441 | Sunagawa et al. Science 22 May 2015: Vol. 348, Issue 6373 |
| SAMEA2622796 | European Nucleotide Archive | TARA_124_MIX_0.22-3    | South Pacific Ocean [MRGID:1910] | South Pacific | -9.071  | -140.597 | 118.3 | 175.9 | 0.86 | 0.35 | 0.49 | 25.2 | 35.8 | HiSeq-illumina | 177586325 | Sunagawa et al. Science 22 May 2015: Vol. 348, Issue 6373 |
| SAMEA2622801 | European Nucleotide Archive | TARA_124_MIX_0.45-0.8  | South Pacific Ocean [MRGID:1910] | South Pacific | -9.071  | -140.597 | 118.3 | 175.9 | 0.86 | 0.35 | 0.49 | 25.2 | 35.8 | HiSeq-illumina | 152307354 | Sunagawa et al. Science 22 May 2015: Vol. 348, Issue 6373 |
| SAMEA2622763 | European Nucleotide Archive | TARA_124_SRF_0.1-0.22  | South Pacific Ocean [MRGID:1910] | South Pacific | -9.150  | -140.522 | 9.9   | 190.7 | 6.02 | 0.16 | 0.63 | 26.5 | 35.4 | HiSeq-illumina | 69048551  | Sunagawa et al. Science 22 May 2015: Vol. 348, Issue 6373 |
| SAMEA2622764 | European Nucleotide Archive | TARA_124_SRF_0.22-0.45 | South Pacific Ocean [MRGID:1910] | South Pacific | -9.150  | -140.522 | 9.9   | 190.7 | 6.02 | 0.16 | 0.63 | 26.5 | 35.4 | HiSeq-illumina | 139921860 | Sunagawa et al. Science 22 May 2015: Vol. 348, Issue 6373 |
| SAMEA2622759 | European Nucleotide Archive | TARA_124_SRF_0.22-3    | South Pacific Ocean [MRGID:1910] | South Pacific | -9.150  | -140.522 | 9.9   | 190.7 | 6.02 | 0.16 | 0.63 | 26.5 | 35.4 | HiSeq-illumina | 232627344 | Sunagawa et al. Science 22 May 2015: Vol. 348, Issue 6373 |
| SAMEA2622765 | European Nucleotide Archive | TARA_124_SRF_0.45-0.8  | South Pacific Ocean [MRGID:1910] | South Pacific | -9.150  | -140.522 | 9.9   | 190.7 | 6.02 | 0.16 | 0.63 | 26.5 | 35.4 | HiSeq-illumina | 150305739 | Sunagawa et al. Science 22 May 2015: Vol. 348, Issue 6373 |

|                                                        |                             |                                     |                                  |                |         |          |       |       |       |      |      |        |        |                |            |                                                            |
|--------------------------------------------------------|-----------------------------|-------------------------------------|----------------------------------|----------------|---------|----------|-------|-------|-------|------|------|--------|--------|----------------|------------|------------------------------------------------------------|
| SAMEA2622841                                           | European Nucleotide Archive | TARA_125_MIX_0.1-0.22               | South Pacific Ocean [MRGID:1910] | South Pacific  | -8.900  | -142.546 | 138.2 | 160.5 | 3.09  | 0.06 | 0.56 | 23.7   | 36.3   | HiSeq-illumina | 92519259   | Sunagawa et al. Science 22 May 2015: Vol. 348, Issue 6373  |
| SAMEA2622842                                           | European Nucleotide Archive | TARA_125_MIX_0.22-0.45              | South Pacific Ocean [MRGID:1910] | South Pacific  | -8.900  | -142.546 | 138.2 | 160.5 | 3.09  | 0.06 | 0.56 | 23.7   | 36.3   | HiSeq-illumina | 165021188  | Sunagawa et al. Science 22 May 2015: Vol. 348, Issue 6373  |
| SAMEA2622837                                           | European Nucleotide Archive | TARA_125_MIX_0.22-3                 | South Pacific Ocean [MRGID:1910] | South Pacific  | -8.900  | -142.546 | 138.2 | 160.5 | 3.09  | 0.06 | 0.56 | 23.7   | 36.3   | HiSeq-illumina | 145634620  | Sunagawa et al. Science 22 May 2015: Vol. 348, Issue 6373  |
| SAMEA2622843                                           | European Nucleotide Archive | TARA_125_MIX_0.45-0.8               | South Pacific Ocean [MRGID:1910] | South Pacific  | -8.900  | -142.546 | 138.2 | 160.5 | 3.09  | 0.06 | 0.56 | 23.7   | 36.3   | HiSeq-illumina | 172949278  | Sunagawa et al. Science 22 May 2015: Vol. 348, Issue 6373  |
| SAMEA2622821                                           | European Nucleotide Archive | TARA_125_SRF_0.1-0.22               | South Pacific Ocean [MRGID:1910] | South Pacific  | -8.911  | -142.557 | 5.5   | 187.3 | 3.54  | 0.19 | 0.56 | 26.8   | 35.4   | HiSeq-illumina | 79733673   | Sunagawa et al. Science 22 May 2015: Vol. 348, Issue 6373  |
| SAMEA2622822                                           | European Nucleotide Archive | TARA_125_SRF_0.22-0.45              | South Pacific Ocean [MRGID:1910] | South Pacific  | -8.911  | -142.557 | 5.5   | 187.3 | 3.54  | 0.19 | 0.56 | 26.8   | 35.4   | HiSeq-illumina | 156388404  | Sunagawa et al. Science 22 May 2015: Vol. 348, Issue 6373  |
| SAMEA2622817                                           | European Nucleotide Archive | TARA_125_SRF_0.22-3                 | South Pacific Ocean [MRGID:1910] | South Pacific  | -8.911  | -142.557 | 5.5   | 187.3 | 3.54  | 0.19 | 0.56 | 26.8   | 35.4   | HiSeq-illumina | 154036689  | Sunagawa et al. Science 22 May 2015: Vol. 348, Issue 6373  |
| SAMEA2622823                                           | European Nucleotide Archive | TARA_125_SRF_0.45-0.8               | South Pacific Ocean [MRGID:1910] | South Pacific  | -8.911  | -142.557 | 5.5   | 187.3 | 3.54  | 0.19 | 0.56 | 26.8   | 35.4   | HiSeq-illumina | 148150069  | Sunagawa et al. Science 22 May 2015: Vol. 348, Issue 6373  |
| SAMEA2622923                                           | European Nucleotide Archive | TARA_128_DCM_0.22-3                 | South Pacific Ocean [MRGID:1910] | South Pacific  | 0.022   | -153.686 | 41.7  | 177.0 | 4.98  | 0.28 | 0.55 | 26.1   | 35.1   | HiSeq-illumina | 125802183  | Sunagawa et al. Science 22 May 2015: Vol. 348, Issue 6373  |
| SAMEA2622901                                           | European Nucleotide Archive | TARA_128_SRF_0.22-3                 | South Pacific Ocean [MRGID:1910] | South Pacific  | 0.000   | -153.676 | 5.4   | 179.9 | 4.81  | 0.27 | 0.54 | 26.1   | 35.1   | HiSeq-illumina | 139904160  | Sunagawa et al. Science 22 May 2015: Vol. 348, Issue 6373  |
| SAMEA2621487                                           | European Nucleotide Archive | TARA_084_SRF_0.22-3                 | Southern Ocean [MRGID:1907]      | Southern Ocean | -60.229 | -60.648  | 5.9   | 338.3 | 25.03 | 0.27 | 1.72 | 1.8    | 33.7   | HiSeq-illumina | 190610130  | Sunagawa et al. Science 22 May 2015: Vol. 348, Issue 6373  |
| SAMEA2621536                                           | European Nucleotide Archive | TARA_085_DCM_0.22-3                 | Southern Ocean [MRGID:1907]      | Southern Ocean | -62.223 | -49.214  | 87.4  | 325.4 | 30.94 | 0.06 | 2.31 | -0.8   | 34.3   | HiSeq-illumina | 178428793  | Sunagawa et al. Science 22 May 2015: Vol. 348, Issue 6373  |
| SAMEA2621509                                           | European Nucleotide Archive | TARA_085_SRF_0.22-3                 | Southern Ocean [MRGID:1907]      | Southern Ocean | -62.039 | -49.529  | 5.9   | 343.4 | 28.39 | 0.11 | 2.11 | 0.7    | 34.4   | HiSeq-illumina | 176078135  | Sunagawa et al. Science 22 May 2015: Vol. 348, Issue 6373  |
| SAMEA2620158, SAMEA2620136, SAMEA2620147, SAMEA2620169 | European Nucleotide Archive | TARA_B100000116                     | Indian Ocean [MRGID:1904]        | Indian Ocean   | 17.485  | 68.000   | 75    | 59.3  | 13.83 | 0.04 | 1.50 | 23.6   | 35.9   | HiSeq-illumina | 1064527710 | Salazar et al. Cell 14 November 2019: Vol. 179, Issue 5    |
| SAMEA2620261                                           | European Nucleotide Archive | TARA_B100000133                     | Indian Ocean [MRGID:1904]        | Indian Ocean   | 6.000   | 73.907   | 80    | 137.9 | 0.00  | 0.15 | 0.00 | 27.96  | 35.044 | HiSeq-illumina | 292998252  | Salazar et al. Cell 14 November 2019: Vol. 179, Issue 5    |
| SAMEA2621511                                           | European Nucleotide Archive | TARA_B100000624                     | North Pacific Ocean [MRGID:1908] | North Pacific  | 6.611   | -155.054 | 85    | 183.2 | 0.00  | 0.69 | 4.11 | 28.308 | 34.8   | HiSeq-illumina | 225903500  | Salazar et al. Cell 14 November 2019: Vol. 179, Issue 5    |
| SAMEA2623027                                           | European Nucleotide Archive | TARA_B100000639                     | North Pacific Ocean [MRGID:1908] | North Pacific  | 22.790  | -157.944 | 110   | 204.2 | 0.00  | 0.01 | 0.02 | 22.3   | 35.3   | HiSeq-illumina | 298456081  | Salazar et al. Cell 14 November 2019: Vol. 179, Issue 5    |
| SAMEA2623083                                           | European Nucleotide Archive | TARA_B100000660                     | North Pacific Ocean [MRGID:1908] | North Pacific  | 31.517  | -159.046 | 115   | 222.9 | 0.00  | 0.02 | 0.12 | 15.32  | 34.4   | HiSeq-illumina | 183888911  | Salazar et al. Cell 14 November 2019: Vol. 179, Issue 5    |
| SAMN04335825                                           | NCBI SRA                    | Mt_ETNP_NH14_S10_100m_cDNA_illumina | North Pacific Ocean [MRGID:1908] | North Pacific  | 18.310  | -105.209 | 100   |       |       |      |      |        |        | HiSeq-illumina | 2149661    | Garcia-Robledo et al. PNAS 17 July 2017: Vol 114, Issue 31 |
| SAMN03379861                                           | NCBI SRA                    | Mt_ETNP_NH14_S10_150m_cDNA_illumina | North Pacific Ocean [MRGID:1908] | North Pacific  | 18.310  | -105.209 | 150   |       |       |      |      |        |        | HiSeq-illumina | 4523472    | Garcia-Robledo et al. PNAS 17 July 2017: Vol 114, Issue 31 |
| SAMN04335847                                           | NCBI SRA                    | Mt_ETNP_NH14_S14_100m_cDNA_illumina | North Pacific Ocean [MRGID:1908] | North Pacific  | 21.292  | -108.241 | 100   |       |       |      |      |        |        | HiSeq-illumina | 2520169    | Garcia-Robledo et al. PNAS 17 July 2017: Vol 114, Issue 31 |
| SAMN04335847                                           | NCBI SRA                    | Mt_ETNP_NH14_S14_150m_cDNA_illumina | North Pacific Ocean [MRGID:1908] | North Pacific  | 21.292  | -107.241 | 150   |       |       |      |      |        |        | HiSeq-illumina | 1291622    | Garcia-Robledo et al. PNAS 17 July 2017: Vol 114, Issue 31 |
| SAMN04335848                                           | NCBI SRA                    | Mt_ETNP_NH14_S14_200m_cDNA_illumina | North Pacific Ocean [MRGID:1908] | North Pacific  | 21.292  | -106.241 | 200   |       |       |      |      |        |        | HiSeq-illumina | 1212126    | Garcia-Robledo et al. PNAS 17 July 2017: Vol 114, Issue 31 |
| SAMN04335824                                           | NCBI SRA                    | Mt_ETNP_NH14_S14_60m_cDNA_illumina  | North Pacific Ocean [MRGID:1908] | North Pacific  | 21.292  | -105.241 | 60    |       |       |      |      |        |        | HiSeq-illumina | 2302732    | Garcia-Robledo et al. PNAS 17 July 2017: Vol 114, Issue 31 |
| SAMN04335853                                           | NCBI SRA                    | Mt_ETNP_NH14_S16_100m_cDNA_illumina | North Pacific Ocean [MRGID:1908] | North Pacific  | 18.900  | -104.5   | 100   |       |       |      |      |        |        | HiSeq-illumina | 1601640    | Garcia-Robledo et al. PNAS 17 July 2017: Vol 114, Issue 31 |
